# Supplementary material
Source: publisher figshare collection journal article supplement (https://acs.figshare.com/ndownloader/files/5959404)
Supplement: Supplementary file 1 [file 5959404]

 
data_mk373
 
_audit_creation_method            'SHELXL-2014/7'
_shelx_SHELXL_version_number      '2014/7'
_chemical_name_systematic         ?
_chemical_name_common             ?
_chemical_melting_point           ?
_chemical_formula_moiety            
 'C29 H42 Cl Mg N3 O, C H2 Cl2'
_chemical_formula_sum
 'C30 H44 Cl3 Mg N3 O' 
_chemical_formula_weight          593.34

loop_
 _atom_type_symbol
 _atom_type_description
 _atom_type_scat_dispersion_real
 _atom_type_scat_dispersion_imag
 _atom_type_scat_source
 'C'  'C'   0.0033   0.0016
 'International Tables Vol C Tables 4.2.6.8 and 6.1.1.4'
 'H'  'H'   0.0000   0.0000
 'International Tables Vol C Tables 4.2.6.8 and 6.1.1.4'
 'N'  'N'   0.0061   0.0033
 'International Tables Vol C Tables 4.2.6.8 and 6.1.1.4'
 'O'  'O'   0.0106   0.0060
 'International Tables Vol C Tables 4.2.6.8 and 6.1.1.4'
 'Mg'  'Mg'   0.0486   0.0363
 'International Tables Vol C Tables 4.2.6.8 and 6.1.1.4'
 'Cl'  'Cl'   0.1484   0.1585
 'International Tables Vol C Tables 4.2.6.8 and 6.1.1.4'
 
_space_group_crystal_system       orthorhombic
_space_group_IT_number            19
_space_group_name_H-M_alt         'P 21 21 21'
_space_group_name_Hall            'P 2ac 2ab'
 
_shelx_space_group_comment
;
The symmetry employed for this shelxl refinement is uniquely defined
by the following loop, which should always be used as a source of
symmetry information in preference to the above space-group names.
They are only intended as comments.
;
 
loop_
 _space_group_symop_operation_xyz
 'x, y, z'
 '-x+1/2, -y, z+1/2'
 '-x, y+1/2, -z+1/2'
 'x+1/2, -y+1/2, -z'
 
_cell_length_a                    7.9066(5)
_cell_length_b                    17.5510(13)
_cell_length_c                    22.4279(18)
_cell_angle_alpha                 90
_cell_angle_beta                  90
_cell_angle_gamma                 90
_cell_volume                      3112.3(4)
_cell_formula_units_Z             4
_cell_measurement_temperature     110(2)
_cell_measurement_reflns_used     4196
_cell_measurement_theta_min       1.82
_cell_measurement_theta_max       25.0
 
_exptl_crystal_description        'needle'
_exptl_crystal_colour             'colorless'
_exptl_crystal_density_meas       ?
_exptl_crystal_density_method     ?
_exptl_crystal_density_diffrn     1.266          
_exptl_crystal_F_000              1264
_exptl_transmission_factor_min    ?
_exptl_transmission_factor_max    ?
_exptl_crystal_size_max           0.300
_exptl_crystal_size_mid           0.150
_exptl_crystal_size_min           0.120
_exptl_absorpt_coefficient_mu     0.342
_shelx_estimated_absorpt_T_min    0.904
_shelx_estimated_absorpt_T_max    0.960
_exptl_absorpt_correction_type    'multi-scan'
_exptl_absorpt_correction_T_min   0.904
_exptl_absorpt_correction_T_max   0.960
_exptl_absorpt_process_details    'Sadabs, Bruker-AXS'
_exptl_absorpt_special_details    ?
_diffrn_ambient_temperature       110(2)
_diffrn_radiation_wavelength      0.71073
_diffrn_radiation_type            MoK\a
_diffrn_source                    'ImuS micro-focus'
_diffrn_measurement_device_type   'ApexDuo, Bruker-AXS'
_diffrn_measurement_method        '1 deg. \f and \w scans'
_diffrn_detector_area_resol_mean  1.75
_diffrn_reflns_number             6450
_diffrn_reflns_av_unetI/netI      0.0628
_diffrn_reflns_av_R_equivalents   0.0248
_diffrn_reflns_limit_h_min        -9
_diffrn_reflns_limit_h_max        7
_diffrn_reflns_limit_k_min        -20
_diffrn_reflns_limit_k_max        19
_diffrn_reflns_limit_l_min        -15
_diffrn_reflns_limit_l_max        26
_diffrn_reflns_theta_min          1.816
_diffrn_reflns_theta_max          25.027
_diffrn_reflns_theta_full         25.027
_diffrn_measured_fraction_theta_max   0.980
_diffrn_measured_fraction_theta_full  0.980
_diffrn_reflns_Laue_measured_fraction_max    0.980
_diffrn_reflns_Laue_measured_fraction_full   0.980
_diffrn_reflns_point_group_measured_fraction_max   0.983
_diffrn_reflns_point_group_measured_fraction_full  0.983
_reflns_number_total              4786
_reflns_number_gt                 4196
_reflns_threshold_expression      'I > 2\s(I)'
_reflns_Friedel_coverage          0.761
_reflns_Friedel_fraction_max      0.986
_reflns_Friedel_fraction_full     0.986
 
_reflns_special_details
;
 Reflections were merged by SHELXL according to the crystal
 class for the calculation of statistics and refinement.
 
 _reflns_Friedel_fraction is defined as the number of unique
 Friedel pairs measured divided by the number that would be
 possible theoretically, ignoring centric projections and
 systematic absences.
;
 
_computing_data_collection        'Apex2, Bruker-AXS'
_computing_cell_refinement        'Saint, Bruker-AXS'
_computing_data_reduction         'Saint, Bruker-AXS'
_computing_structure_solution     'SHELXT-2014 (sheldrick, 2015)'
_computing_structure_refinement 'SHELXL-2014/7 (Sheldrick, 2015)'
_computing_molecular_graphics     ?
_computing_publication_material   ?
_refine_special_details
;
 Refined as a 2-component inversion twin.
;
_refine_ls_structure_factor_coef  Fsqd
_refine_ls_matrix_type            full
_refine_ls_weighting_scheme       calc
_refine_ls_weighting_details
'w=1/[\s^2^(Fo^2^)+(0.0895P)^2^+5.2670P] where P=(Fo^2^+2Fc^2^)/3'
_atom_sites_solution_primary      direct
_atom_sites_solution_secondary    difmap
_atom_sites_solution_hydrogens    geom
_refine_ls_hydrogen_treatment     constr
_refine_ls_extinction_method      none
_refine_ls_extinction_coef        .
_refine_ls_abs_structure_details
;
 Refined as an inversion twin.
;
_refine_ls_abs_structure_Flack    0.05(14)
_chemical_absolute_configuration  ad
_refine_ls_number_reflns          4786
_refine_ls_number_parameters      350
_refine_ls_number_restraints      0
_refine_ls_R_factor_all           0.0733
_refine_ls_R_factor_gt            0.0634
_refine_ls_wR_factor_ref          0.1718
_refine_ls_wR_factor_gt           0.1638
_refine_ls_goodness_of_fit_ref    1.045
_refine_ls_restrained_S_all       1.045
_refine_ls_shift/su_max           0.012
_refine_ls_shift/su_mean          0.000
 
loop_
 _atom_site_label
 _atom_site_type_symbol
 _atom_site_fract_x
 _atom_site_fract_y
 _atom_site_fract_z
 _atom_site_U_iso_or_equiv
 _atom_site_adp_type
 _atom_site_occupancy
 _atom_site_site_symmetry_order  
 _atom_site_calc_flag
 _atom_site_refinement_flags_posn
 _atom_site_refinement_flags_adp
 _atom_site_refinement_flags_occupancy
 _atom_site_disorder_assembly
 _atom_site_disorder_group
Mg1 Mg 0.8111(2) 0.33985(11) 0.66582(8) 0.0147(4) Uani 1 1 d . . . . .
Cl1 Cl 1.0122(2) 0.39584(10) 0.72889(8) 0.0315(4) Uani 1 1 d . . . . .
Cl2 Cl 0.1119(2) 0.16749(11) 0.85819(8) 0.0369(5) Uani 1 1 d . . . . .
Cl3 Cl -0.1985(3) 0.11004(18) 0.90475(18) 0.0956(12) Uani 1 1 d . . . . .
O1 O 0.8187(6) 0.3528(2) 0.58162(17) 0.0210(10) Uani 1 1 d . . . . .
N1 N 0.6403(6) 0.2741(3) 0.7221(2) 0.0168(11) Uani 1 1 d . . . . .
N2 N 0.6041(7) 0.4236(3) 0.67857(19) 0.0152(11) Uani 1 1 d . . . . .
N3 N 0.9140(7) 0.2244(3) 0.6626(2) 0.0192(11) Uani 1 1 d . . . . .
C1 C 0.7764(8) 0.4153(3) 0.5517(2) 0.0168(13) Uani 1 1 d . . . . .
C2 C 0.5538(8) 0.3295(4) 0.7617(2) 0.0174(13) Uani 1 1 d . . . . .
H2 H 0.6351 0.3502 0.7918 0.021 Uiso 1 1 calc R U . . .
C3 C 0.8673(8) 0.1814(3) 0.7100(2) 0.0189(13) Uani 1 1 d . . . . .
C4 C 0.8185(9) 0.5085(3) 0.4738(2) 0.0193(13) Uani 1 1 d . . . . .
H4 H 0.8820 0.5257 0.4405 0.023 Uiso 1 1 calc R U . . .
C5 C 0.4958(9) 0.2300(4) 0.6959(2) 0.0202(13) Uani 1 1 d . . . . .
H5A H 0.5325 0.1778 0.6853 0.024 Uiso 1 1 calc R U . . .
H5B H 0.4534 0.2555 0.6595 0.024 Uiso 1 1 calc R U . . .
C6 C 0.4157(9) 0.2836(4) 0.7927(3) 0.0232(14) Uani 1 1 d . . . . .
H6A H 0.3220 0.3170 0.8059 0.028 Uiso 1 1 calc R U . . .
H6B H 0.4613 0.2560 0.8277 0.028 Uiso 1 1 calc R U . . .
C7 C 0.6318(8) 0.4569(4) 0.5694(2) 0.0185(13) Uani 1 1 d . . . . .
C8 C 0.8702(8) 0.4411(4) 0.5019(2) 0.0181(13) Uani 1 1 d . . . . .
C9 C 1.0649(8) 0.1171(4) 0.6238(3) 0.0266(15) Uani 1 1 d . . . . .
H9 H 1.1341 0.0957 0.5935 0.032 Uiso 1 1 calc R U . . .
C10 C 0.4795(8) 0.3942(4) 0.7244(2) 0.0178(13) Uani 1 1 d . . . . .
H10 H 0.3745 0.3763 0.7040 0.021 Uiso 1 1 calc R U . . .
C11 C 0.7577(9) 0.2229(4) 0.7549(2) 0.0212(14) Uani 1 1 d . . . . .
H11A H 0.6926 0.1858 0.7789 0.025 Uiso 1 1 calc R U . . .
H11B H 0.8296 0.2532 0.7822 0.025 Uiso 1 1 calc R U . . .
C12 C 0.9186(8) 0.1070(4) 0.7164(3) 0.0246(14) Uani 1 1 d . . . . .
H12 H 0.8876 0.0783 0.7506 0.030 Uiso 1 1 calc R U . . .
C13 C 0.9686(9) 0.3122(4) 0.4649(3) 0.0243(15) Uani 1 1 d . . . . .
H13A H 1.0681 0.2820 0.4539 0.036 Uiso 1 1 calc R U . . .
H13B H 0.8882 0.3127 0.4316 0.036 Uiso 1 1 calc R U . . .
H13C H 0.9146 0.2897 0.5001 0.036 Uiso 1 1 calc R U . . .
C14 C 0.5199(8) 0.4260(4) 0.6179(2) 0.0166(12) Uani 1 1 d . . . . .
H14A H 0.4841 0.3738 0.6069 0.020 Uiso 1 1 calc R U . . .
H14B H 0.4170 0.4579 0.6205 0.020 Uiso 1 1 calc R U . . .
C15 C 0.6204(10) 0.6249(4) 0.4602(3) 0.0291(16) Uani 1 1 d . . . . .
C16 C 0.6509(9) 0.5021(4) 0.6986(3) 0.0238(15) Uani 1 1 d . . . . .
H16A H 0.7741 0.5104 0.6942 0.029 Uiso 1 1 calc R U . . .
H16B H 0.5903 0.5408 0.6747 0.029 Uiso 1 1 calc R U . . .
C17 C 0.4375(9) 0.4631(4) 0.7646(3) 0.0243(15) Uani 1 1 d . . . . .
H17A H 0.3422 0.4932 0.7483 0.029 Uiso 1 1 calc R U . . .
H17B H 0.4101 0.4469 0.8057 0.029 Uiso 1 1 calc R U . . .
C18 C 1.0239(8) 0.3953(4) 0.4794(2) 0.0210(13) Uani 1 1 d . . . . .
C19 C 0.5867(9) 0.5236(4) 0.5400(3) 0.0219(14) Uani 1 1 d . . . . .
H19 H 0.4897 0.5509 0.5529 0.026 Uiso 1 1 calc R U . . .
C20 C 1.0104(8) 0.1920(4) 0.6206(3) 0.0201(13) Uani 1 1 d . . . . .
H20 H 1.0430 0.2217 0.5872 0.024 Uiso 1 1 calc R U . . .
C21 C 0.6808(9) 0.5517(4) 0.4915(2) 0.0204(13) Uani 1 1 d . . . . .
C22 C 1.1003(9) 0.4302(4) 0.4224(3) 0.0271(15) Uani 1 1 d . . . . .
H22A H 1.1430 0.4813 0.4312 0.041 Uiso 1 1 calc R U . . .
H22B H 1.0130 0.4333 0.3915 0.041 Uiso 1 1 calc R U . . .
H22C H 1.1934 0.3980 0.4084 0.041 Uiso 1 1 calc R U . . .
C23 C 1.1619(8) 0.3944(4) 0.5272(3) 0.0260(15) Uani 1 1 d . . . . .
H23A H 1.1157 0.3734 0.5643 0.039 Uiso 1 1 calc R U . . .
H23B H 1.2017 0.4465 0.5343 0.039 Uiso 1 1 calc R U . . .
H23C H 1.2566 0.3628 0.5137 0.039 Uiso 1 1 calc R U . . .
C24 C 1.0157(9) 0.0750(4) 0.6722(3) 0.0285(15) Uani 1 1 d . . . . .
H24 H 1.0489 0.0231 0.6752 0.034 Uiso 1 1 calc R U . . .
C25 C 0.3553(9) 0.2272(4) 0.7442(3) 0.0292(16) Uani 1 1 d . . . . .
H25A H 0.2451 0.2434 0.7274 0.035 Uiso 1 1 calc R U . . .
H25B H 0.3437 0.1752 0.7606 0.035 Uiso 1 1 calc R U . . .
C26 C 0.6158(13) 0.6911(4) 0.5039(3) 0.044(2) Uani 1 1 d . . . . .
H26A H 0.5356 0.6797 0.5360 0.065 Uiso 1 1 calc R U . . .
H26B H 0.5798 0.7374 0.4831 0.065 Uiso 1 1 calc R U . . .
H26C H 0.7288 0.6988 0.5208 0.065 Uiso 1 1 calc R U . . .
C27 C 0.4407(12) 0.6138(5) 0.4344(4) 0.047(2) Uani 1 1 d . . . . .
H27A H 0.3617 0.6027 0.4670 0.071 Uiso 1 1 calc R U . . .
H27B H 0.4413 0.5713 0.4062 0.071 Uiso 1 1 calc R U . . .
H27C H 0.4053 0.6605 0.4139 0.071 Uiso 1 1 calc R U . . .
C28 C 0.7370(14) 0.6470(5) 0.4092(4) 0.060(3) Uani 1 1 d . . . . .
H28A H 0.6923 0.6924 0.3892 0.090 Uiso 1 1 calc R U . . .
H28B H 0.7439 0.6049 0.3806 0.090 Uiso 1 1 calc R U . . .
H28C H 0.8500 0.6581 0.4249 0.090 Uiso 1 1 calc R U . . .
C29 C 0.0095(11) 0.0881(5) 0.8920(4) 0.049(2) Uani 1 1 d . . . . .
H29A H 0.0172 0.0432 0.8654 0.058 Uiso 1 1 calc R U . . .
H29B H 0.0659 0.0755 0.9301 0.058 Uiso 1 1 calc R U . . .
C30 C 0.6005(16) 0.5071(6) 0.7623(4) 0.066(3) Uani 1 1 d . . . . .
H30A H 0.5831 0.5607 0.7745 0.079 Uiso 1 1 calc R U . . .
H30B H 0.6871 0.4837 0.7885 0.079 Uiso 1 1 calc R U . . .
 
loop_
 _atom_site_aniso_label
 _atom_site_aniso_U_11
 _atom_site_aniso_U_22
 _atom_site_aniso_U_33
 _atom_site_aniso_U_23
 _atom_site_aniso_U_13
 _atom_site_aniso_U_12
Mg1 0.0142(10) 0.0155(10) 0.0145(8) -0.0001(8) 0.0004(8) 0.0004(9)
Cl1 0.0168(8) 0.0350(10) 0.0428(9) -0.0160(7) -0.0083(7) 0.0008(8)
Cl2 0.0358(10) 0.0362(10) 0.0388(9) 0.0117(8) 0.0099(8) 0.0012(9)
Cl3 0.0445(15) 0.0682(19) 0.174(3) 0.042(2) 0.0409(19) -0.0020(14)
O1 0.026(2) 0.021(2) 0.0164(18) 0.0021(17) 0.0038(18) 0.007(2)
N1 0.015(3) 0.019(3) 0.017(2) 0.002(2) 0.002(2) -0.002(2)
N2 0.018(3) 0.015(3) 0.013(2) 0.0011(19) -0.001(2) 0.000(2)
N3 0.020(3) 0.018(3) 0.020(2) 0.000(2) 0.000(2) 0.004(2)
C1 0.020(3) 0.016(3) 0.015(2) -0.002(2) 0.000(2) -0.003(3)
C2 0.021(3) 0.018(3) 0.013(2) -0.003(2) 0.002(2) -0.002(3)
C3 0.020(3) 0.016(3) 0.020(3) -0.001(2) -0.001(2) 0.001(3)
C4 0.025(3) 0.019(3) 0.014(2) 0.000(2) 0.001(3) -0.010(3)
C5 0.026(3) 0.017(3) 0.018(3) -0.007(2) 0.003(3) -0.006(3)
C6 0.028(4) 0.020(3) 0.021(3) -0.001(3) 0.009(3) 0.001(3)
C7 0.018(3) 0.023(3) 0.014(2) 0.002(2) -0.001(2) 0.002(3)
C8 0.019(3) 0.022(3) 0.013(2) -0.004(2) -0.003(2) 0.001(3)
C9 0.023(3) 0.026(4) 0.030(3) -0.010(3) 0.007(3) 0.004(3)
C10 0.018(3) 0.020(3) 0.015(2) -0.001(2) 0.006(3) -0.003(3)
C11 0.024(3) 0.021(3) 0.019(3) 0.006(3) 0.002(3) 0.003(3)
C12 0.021(3) 0.020(3) 0.033(3) 0.007(3) -0.008(3) -0.005(3)
C13 0.027(4) 0.028(4) 0.018(3) -0.006(3) -0.004(3) 0.010(3)
C14 0.013(3) 0.024(3) 0.013(2) 0.002(2) 0.001(2) 0.005(3)
C15 0.037(4) 0.023(4) 0.028(3) 0.012(3) 0.004(3) 0.005(3)
C16 0.029(4) 0.015(3) 0.028(3) -0.001(3) 0.000(3) -0.005(3)
C17 0.028(4) 0.017(3) 0.028(3) -0.001(3) 0.009(3) 0.006(3)
C18 0.020(3) 0.026(3) 0.018(3) -0.001(2) 0.002(2) -0.001(3)
C19 0.021(3) 0.026(4) 0.019(3) 0.000(3) 0.001(3) 0.006(3)
C20 0.016(3) 0.020(3) 0.024(3) -0.002(2) 0.002(3) -0.001(3)
C21 0.025(3) 0.019(3) 0.018(3) 0.002(2) 0.004(3) 0.000(3)
C22 0.025(4) 0.033(4) 0.023(3) 0.000(3) 0.009(3) 0.003(3)
C23 0.020(3) 0.034(4) 0.023(3) -0.006(3) -0.003(3) 0.004(3)
C24 0.026(4) 0.021(4) 0.038(3) -0.003(3) -0.006(3) 0.005(3)
C25 0.026(4) 0.024(4) 0.038(4) -0.009(3) 0.008(3) -0.006(3)
C26 0.067(6) 0.027(4) 0.036(4) 0.006(3) 0.007(4) 0.012(4)
C27 0.065(6) 0.038(5) 0.039(4) 0.014(4) -0.006(4) 0.012(5)
C28 0.082(7) 0.049(6) 0.048(5) 0.025(4) 0.037(5) 0.023(5)
C29 0.037(4) 0.052(5) 0.057(5) 0.035(4) 0.013(4) 0.010(4)
C30 0.094(9) 0.046(6) 0.058(5) -0.010(5) 0.005(6) -0.010(6)
 
_geom_special_details
;
 All esds (except the esd in the dihedral angle between two l.s. planes)
 are estimated using the full covariance matrix.  The cell esds are taken
 into account individually in the estimation of esds in distances, angles
 and torsion angles; correlations between esds in cell parameters are only
 used when they are defined by crystal symmetry.  An approximate (isotropic)
 treatment of cell esds is used for estimating esds involving l.s. planes.
;
 
loop_
 _geom_bond_atom_site_label_1
 _geom_bond_atom_site_label_2
 _geom_bond_distance
 _geom_bond_site_symmetry_2
 _geom_bond_publ_flag
Mg1 O1 1.903(4) . ?
Mg1 N1 2.179(5) . ?
Mg1 N3 2.185(5) . ?
Mg1 N2 2.218(5) . ?
Mg1 Cl1 2.344(2) . ?
Cl2 C29 1.781(8) . ?
Cl3 C29 1.713(9) . ?
O1 C1 1.329(7) . ?
N1 C2 1.485(8) . ?
N1 C11 1.486(8) . ?
N1 C5 1.499(8) . ?
N2 C16 1.496(8) . ?
N2 C10 1.514(7) . ?
N2 C14 1.516(7) . ?
N3 C20 1.337(8) . ?
N3 C3 1.354(8) . ?
C1 C7 1.413(9) . ?
C1 C8 1.415(8) . ?
C2 C6 1.525(9) . ?
C2 C10 1.528(8) . ?
C2 H2 1.0000 . ?
C3 C12 1.376(9) . ?
C3 C11 1.515(9) . ?
C4 C21 1.384(9) . ?
C4 C8 1.402(9) . ?
C4 H4 0.9500 . ?
C5 C25 1.551(9) . ?
C5 H5A 0.9900 . ?
C5 H5B 0.9900 . ?
C6 C25 1.546(9) . ?
C6 H6A 0.9900 . ?
C6 H6B 0.9900 . ?
C7 C19 1.391(9) . ?
C7 C14 1.503(8) . ?
C8 C18 1.543(9) . ?
C9 C24 1.368(9) . ?
C9 C20 1.386(9) . ?
C9 H9 0.9500 . ?
C10 C17 1.543(8) . ?
C10 H10 1.0000 . ?
C11 H11A 0.9900 . ?
C11 H11B 0.9900 . ?
C12 C24 1.374(10) . ?
C12 H12 0.9500 . ?
C13 C18 1.556(9) . ?
C13 H13A 0.9800 . ?
C13 H13B 0.9800 . ?
C13 H13C 0.9800 . ?
C14 H14A 0.9900 . ?
C14 H14B 0.9900 . ?
C15 C28 1.519(10) . ?
C15 C26 1.521(10) . ?
C15 C21 1.540(9) . ?
C15 C27 1.546(12) . ?
C16 C30 1.486(11) . ?
C16 H16A 0.9900 . ?
C16 H16B 0.9900 . ?
C17 C30 1.504(13) . ?
C17 H17A 0.9900 . ?
C17 H17B 0.9900 . ?
C18 C23 1.530(8) . ?
C18 C22 1.539(8) . ?
C19 C21 1.407(9) . ?
C19 H19 0.9500 . ?
C20 H20 0.9500 . ?
C22 H22A 0.9800 . ?
C22 H22B 0.9800 . ?
C22 H22C 0.9800 . ?
C23 H23A 0.9800 . ?
C23 H23B 0.9800 . ?
C23 H23C 0.9800 . ?
C24 H24 0.9500 . ?
C25 H25A 0.9900 . ?
C25 H25B 0.9900 . ?
C26 H26A 0.9800 . ?
C26 H26B 0.9800 . ?
C26 H26C 0.9800 . ?
C27 H27A 0.9800 . ?
C27 H27B 0.9800 . ?
C27 H27C 0.9800 . ?
C28 H28A 0.9800 . ?
C28 H28B 0.9800 . ?
C28 H28C 0.9800 . ?
C29 H29A 0.9900 . ?
C29 H29B 0.9900 . ?
C30 H30A 0.9900 . ?
C30 H30B 0.9900 . ?
 
loop_
 _geom_angle_atom_site_label_1
 _geom_angle_atom_site_label_2
 _geom_angle_atom_site_label_3
 _geom_angle
 _geom_angle_site_symmetry_1
 _geom_angle_site_symmetry_3
 _geom_angle_publ_flag
O1 Mg1 N1 131.1(2) . . ?
O1 Mg1 N3 93.80(19) . . ?
N1 Mg1 N3 76.0(2) . . ?
O1 Mg1 N2 94.13(19) . . ?
N1 Mg1 N2 79.58(19) . . ?
N3 Mg1 N2 153.3(2) . . ?
O1 Mg1 Cl1 121.84(18) . . ?
N1 Mg1 Cl1 107.03(15) . . ?
N3 Mg1 Cl1 98.99(16) . . ?
N2 Mg1 Cl1 98.33(15) . . ?
C1 O1 Mg1 126.3(4) . . ?
C2 N1 C11 112.8(4) . . ?
C2 N1 C5 102.8(5) . . ?
C11 N1 C5 111.0(5) . . ?
C2 N1 Mg1 106.6(4) . . ?
C11 N1 Mg1 102.7(4) . . ?
C5 N1 Mg1 121.3(3) . . ?
C16 N2 C10 105.7(4) . . ?
C16 N2 C14 110.7(4) . . ?
C10 N2 C14 109.5(4) . . ?
C16 N2 Mg1 117.8(4) . . ?
C10 N2 Mg1 110.0(3) . . ?
C14 N2 Mg1 103.1(3) . . ?
C20 N3 C3 118.1(5) . . ?
C20 N3 Mg1 129.0(4) . . ?
C3 N3 Mg1 112.9(4) . . ?
O1 C1 C7 119.2(5) . . ?
O1 C1 C8 122.0(6) . . ?
C7 C1 C8 118.7(5) . . ?
N1 C2 C6 104.8(5) . . ?
N1 C2 C10 109.7(4) . . ?
C6 C2 C10 111.5(5) . . ?
N1 C2 H2 110.2 . . ?
C6 C2 H2 110.2 . . ?
C10 C2 H2 110.2 . . ?
N3 C3 C12 122.0(6) . . ?
N3 C3 C11 114.2(5) . . ?
C12 C3 C11 123.8(6) . . ?
C21 C4 C8 124.3(5) . . ?
C21 C4 H4 117.9 . . ?
C8 C4 H4 117.9 . . ?
N1 C5 C25 106.8(4) . . ?
N1 C5 H5A 110.4 . . ?
C25 C5 H5A 110.4 . . ?
N1 C5 H5B 110.4 . . ?
C25 C5 H5B 110.4 . . ?
H5A C5 H5B 108.6 . . ?
C2 C6 C25 103.8(5) . . ?
C2 C6 H6A 111.0 . . ?
C25 C6 H6A 111.0 . . ?
C2 C6 H6B 111.0 . . ?
C25 C6 H6B 111.0 . . ?
H6A C6 H6B 109.0 . . ?
C19 C7 C1 120.6(5) . . ?
C19 C7 C14 119.7(6) . . ?
C1 C7 C14 119.6(5) . . ?
C4 C8 C1 118.1(6) . . ?
C4 C8 C18 121.5(5) . . ?
C1 C8 C18 120.4(5) . . ?
C24 C9 C20 117.7(6) . . ?
C24 C9 H9 121.2 . . ?
C20 C9 H9 121.2 . . ?
N2 C10 C2 112.0(5) . . ?
N2 C10 C17 105.7(5) . . ?
C2 C10 C17 110.2(5) . . ?
N2 C10 H10 109.6 . . ?
C2 C10 H10 109.6 . . ?
C17 C10 H10 109.6 . . ?
N1 C11 C3 108.6(4) . . ?
N1 C11 H11A 110.0 . . ?
C3 C11 H11A 110.0 . . ?
N1 C11 H11B 110.0 . . ?
C3 C11 H11B 110.0 . . ?
H11A C11 H11B 108.4 . . ?
C24 C12 C3 118.5(6) . . ?
C24 C12 H12 120.7 . . ?
C3 C12 H12 120.7 . . ?
C18 C13 H13A 109.5 . . ?
C18 C13 H13B 109.5 . . ?
H13A C13 H13B 109.5 . . ?
C18 C13 H13C 109.5 . . ?
H13A C13 H13C 109.5 . . ?
H13B C13 H13C 109.5 . . ?
C7 C14 N2 113.6(5) . . ?
C7 C14 H14A 108.8 . . ?
N2 C14 H14A 108.8 . . ?
C7 C14 H14B 108.8 . . ?
N2 C14 H14B 108.8 . . ?
H14A C14 H14B 107.7 . . ?
C28 C15 C26 107.7(7) . . ?
C28 C15 C21 111.6(6) . . ?
C26 C15 C21 110.5(6) . . ?
C28 C15 C27 108.0(7) . . ?
C26 C15 C27 108.3(7) . . ?
C21 C15 C27 110.5(6) . . ?
C30 C16 N2 106.1(6) . . ?
C30 C16 H16A 110.5 . . ?
N2 C16 H16A 110.5 . . ?
C30 C16 H16B 110.5 . . ?
N2 C16 H16B 110.5 . . ?
H16A C16 H16B 108.7 . . ?
C30 C17 C10 101.4(6) . . ?
C30 C17 H17A 111.5 . . ?
C10 C17 H17A 111.5 . . ?
C30 C17 H17B 111.5 . . ?
C10 C17 H17B 111.5 . . ?
H17A C17 H17B 109.3 . . ?
C23 C18 C22 107.8(5) . . ?
C23 C18 C8 109.7(5) . . ?
C22 C18 C8 112.0(5) . . ?
C23 C18 C13 109.7(5) . . ?
C22 C18 C13 108.1(5) . . ?
C8 C18 C13 109.6(5) . . ?
C7 C19 C21 121.7(6) . . ?
C7 C19 H19 119.1 . . ?
C21 C19 H19 119.1 . . ?
N3 C20 C9 123.0(6) . . ?
N3 C20 H20 118.5 . . ?
C9 C20 H20 118.5 . . ?
C4 C21 C19 116.4(6) . . ?
C4 C21 C15 124.8(5) . . ?
C19 C21 C15 118.7(6) . . ?
C18 C22 H22A 109.5 . . ?
C18 C22 H22B 109.5 . . ?
H22A C22 H22B 109.5 . . ?
C18 C22 H22C 109.5 . . ?
H22A C22 H22C 109.5 . . ?
H22B C22 H22C 109.5 . . ?
C18 C23 H23A 109.5 . . ?
C18 C23 H23B 109.5 . . ?
H23A C23 H23B 109.5 . . ?
C18 C23 H23C 109.5 . . ?
H23A C23 H23C 109.5 . . ?
H23B C23 H23C 109.5 . . ?
C9 C24 C12 120.7(6) . . ?
C9 C24 H24 119.7 . . ?
C12 C24 H24 119.7 . . ?
C6 C25 C5 104.4(5) . . ?
C6 C25 H25A 110.9 . . ?
C5 C25 H25A 110.9 . . ?
C6 C25 H25B 110.9 . . ?
C5 C25 H25B 110.9 . . ?
H25A C25 H25B 108.9 . . ?
C15 C26 H26A 109.5 . . ?
C15 C26 H26B 109.5 . . ?
H26A C26 H26B 109.5 . . ?
C15 C26 H26C 109.5 . . ?
H26A C26 H26C 109.5 . . ?
H26B C26 H26C 109.5 . . ?
C15 C27 H27A 109.5 . . ?
C15 C27 H27B 109.5 . . ?
H27A C27 H27B 109.5 . . ?
C15 C27 H27C 109.5 . . ?
H27A C27 H27C 109.5 . . ?
H27B C27 H27C 109.5 . . ?
C15 C28 H28A 109.5 . . ?
C15 C28 H28B 109.5 . . ?
H28A C28 H28B 109.5 . . ?
C15 C28 H28C 109.5 . . ?
H28A C28 H28C 109.5 . . ?
H28B C28 H28C 109.5 . . ?
Cl3 C29 Cl2 109.4(5) . . ?
Cl3 C29 H29A 109.8 . . ?
Cl2 C29 H29A 109.8 . . ?
Cl3 C29 H29B 109.8 . . ?
Cl2 C29 H29B 109.8 . . ?
H29A C29 H29B 108.2 . . ?
C16 C30 C17 103.4(7) . . ?
C16 C30 H30A 111.1 . . ?
C17 C30 H30A 111.1 . . ?
C16 C30 H30B 111.1 . . ?
C17 C30 H30B 111.1 . . ?
H30A C30 H30B 109.0 . . ?
 
_refine_diff_density_max    1.112
_refine_diff_density_min   -0.844
_refine_diff_density_rms    0.086

_shelx_res_file
;

    mk373.res created by SHELXL-2014/7


TITL mo_mk373_0m_a.res in P2(1)2(1)2(1)
REM Old TITL mo_mk373_0m in P2(1)2(1)2(1)

REM SHELXT solution in P2(1)2(1)2(1)
REM R1 0.142,  Rweak 0.035,  Alpha 0.002,  Orientation as input
REM Flack x =  0.135 ( 0.043 ) from Parsons' quotients
REM Formula found by SHELXT:  C30 N3 O Mg Cl3

CELL  0.71073   7.9066  17.5510  22.4279   90.000   90.000   90.000
ZERR    4.000   0.0005   0.0013   0.0018    0.000    0.000    0.000
LATT -1
SYMM 1/2-X, -Y, 1/2+Z
SYMM -X, 1/2+Y, 1/2-Z
SYMM 1/2+X, 1/2-Y, -Z
SFAC C H N O MG CL
UNIT 120 176 12 4 4 12
TEMP -163.00
size 0.30 0.15 0.12
L.S. 5
BOND $H
twin
acta
LIST 4
FMAP 2
PLAN -20
omit 2 10 0
omit 3 0 7
omit 4 0 9
omit 5 0 9
omit 3 9 0
omit 4 0 10
omit 0 4 1
WGHT    0.089500    5.267000
BASF   0.05309
FVAR       0.52528
MG1   5    0.811101    0.339853    0.665816    11.00000    0.01422    0.01546 =
         0.01453   -0.00010    0.00037    0.00036
CL1   6    1.012170    0.395841    0.728890    11.00000    0.01681    0.03496 =
         0.04278   -0.01602   -0.00829    0.00083
CL2   6    0.111870    0.167489    0.858194    11.00000    0.03575    0.03623 =
         0.03876    0.01173    0.00988    0.00117
CL3   6   -0.198527    0.110042    0.904750    11.00000    0.04447    0.06817 =
         0.17419    0.04188    0.04092   -0.00199
O1    4    0.818659    0.352798    0.581623    11.00000    0.02553    0.02113 =
         0.01645    0.00206    0.00381    0.00662
N1    3    0.640298    0.274060    0.722090    11.00000    0.01521    0.01853 =
         0.01665    0.00177    0.00159   -0.00216
N2    3    0.604109    0.423571    0.678565    11.00000    0.01760    0.01541 =
         0.01266    0.00112   -0.00077   -0.00017
N3    3    0.913988    0.224359    0.662594    11.00000    0.01955    0.01835 =
         0.01969    0.00042    0.00008    0.00398
C1    1    0.776353    0.415291    0.551707    11.00000    0.01963    0.01568 =
         0.01507   -0.00170   -0.00004   -0.00259
C2    1    0.553817    0.329491    0.761721    11.00000    0.02091    0.01812 =
         0.01320   -0.00259    0.00157   -0.00166
AFIX  13
H2    2    0.635148    0.350213    0.791771    11.00000   -1.20000
AFIX   0
C3    1    0.867254    0.181403    0.709956    11.00000    0.02038    0.01645 =
         0.01990   -0.00055   -0.00119    0.00097
C4    1    0.818457    0.508513    0.473821    11.00000    0.02529    0.01877 =
         0.01374    0.00026    0.00070   -0.00975
AFIX  43
H4    2    0.882046    0.525698    0.440492    11.00000   -1.20000
AFIX   0
C5    1    0.495780    0.230032    0.695948    11.00000    0.02556    0.01677 =
         0.01829   -0.00704    0.00262   -0.00551
AFIX  23
H5A   2    0.532454    0.177829    0.685341    11.00000   -1.20000
H5B   2    0.453440    0.255513    0.659506    11.00000   -1.20000
AFIX   0
C6    1    0.415684    0.283556    0.792708    11.00000    0.02848    0.02021 =
         0.02085   -0.00103    0.00927    0.00086
AFIX  23
H6A   2    0.322032    0.316993    0.805892    11.00000   -1.20000
H6B   2    0.461337    0.256003    0.827701    11.00000   -1.20000
AFIX   0
C7    1    0.631786    0.456851    0.569398    11.00000    0.01819    0.02349 =
         0.01368    0.00183   -0.00131    0.00202
C8    1    0.870173    0.441051    0.501926    11.00000    0.01928    0.02191 =
         0.01298   -0.00364   -0.00275    0.00062
C9    1    1.064931    0.117053    0.623836    11.00000    0.02340    0.02623 =
         0.03019   -0.00956    0.00662    0.00363
AFIX  43
H9    2    1.134118    0.095656    0.593522    11.00000   -1.20000
AFIX   0
C10   1    0.479535    0.394229    0.724420    11.00000    0.01828    0.02046 =
         0.01472   -0.00096    0.00577   -0.00267
AFIX  13
H10   2    0.374482    0.376257    0.703959    11.00000   -1.20000
AFIX   0
C11   1    0.757736    0.222946    0.754859    11.00000    0.02375    0.02107 =
         0.01870    0.00638    0.00168    0.00287
AFIX  23
H11A  2    0.692602    0.185787    0.778851    11.00000   -1.20000
H11B  2    0.829591    0.253168    0.782199    11.00000   -1.20000
AFIX   0
C12   1    0.918565    0.106963    0.716369    11.00000    0.02073    0.01981 =
         0.03322    0.00716   -0.00776   -0.00457
AFIX  43
H12   2    0.887565    0.078314    0.750606    11.00000   -1.20000
AFIX   0
C13   1    0.968587    0.312215    0.464908    11.00000    0.02674    0.02849 =
         0.01758   -0.00591   -0.00411    0.00977
AFIX 137
H13A  2    1.068072    0.282014    0.453921    11.00000   -1.50000
H13B  2    0.888232    0.312672    0.431641    11.00000   -1.50000
H13C  2    0.914599    0.289654    0.500056    11.00000   -1.50000
AFIX   0
C14   1    0.519901    0.425968    0.617879    11.00000    0.01326    0.02357 =
         0.01303    0.00250    0.00136    0.00521
AFIX  23
H14A  2    0.484052    0.373765    0.606929    11.00000   -1.20000
H14B  2    0.416999    0.457926    0.620528    11.00000   -1.20000
AFIX   0
C15   1    0.620429    0.624896    0.460166    11.00000    0.03671    0.02297 =
         0.02772    0.01181    0.00355    0.00545
C16   1    0.650908    0.502051    0.698631    11.00000    0.02850    0.01520 =
         0.02771   -0.00089    0.00036   -0.00549
AFIX  23
H16A  2    0.774107    0.510428    0.694250    11.00000   -1.20000
H16B  2    0.590317    0.540823    0.674722    11.00000   -1.20000
AFIX   0
C17   1    0.437492    0.463087    0.764581    11.00000    0.02799    0.01707 =
         0.02770   -0.00089    0.00915    0.00634
AFIX  23
H17A  2    0.342188    0.493177    0.748297    11.00000   -1.20000
H17B  2    0.410111    0.446881    0.805745    11.00000   -1.20000
AFIX   0
C18   1    1.023933    0.395260    0.479367    11.00000    0.01975    0.02571 =
         0.01752   -0.00088    0.00157   -0.00052
C19   1    0.586667    0.523575    0.539969    11.00000    0.02097    0.02613 =
         0.01866   -0.00013    0.00057    0.00564
AFIX  43
H19   2    0.489711    0.550907    0.552948    11.00000   -1.20000
AFIX   0
C20   1    1.010404    0.191989    0.620650    11.00000    0.01614    0.01987 =
         0.02430   -0.00197    0.00163   -0.00058
AFIX  43
H20   2    1.042983    0.221705    0.587161    11.00000   -1.20000
AFIX   0
C21   1    0.680840    0.551677    0.491472    11.00000    0.02451    0.01909 =
         0.01756    0.00197    0.00364   -0.00004
C22   1    1.100291    0.430154    0.422450    11.00000    0.02482    0.03288 =
         0.02347    0.00019    0.00927    0.00282
AFIX 137
H22A  2    1.143035    0.481349    0.431235    11.00000   -1.50000
H22B  2    1.013016    0.433309    0.391521    11.00000   -1.50000
H22C  2    1.193437    0.398021    0.408354    11.00000   -1.50000
AFIX   0
C23   1    1.161867    0.394424    0.527235    11.00000    0.02046    0.03429 =
         0.02332   -0.00629   -0.00257    0.00427
AFIX 137
H23A  2    1.115697    0.373430    0.564308    11.00000   -1.50000
H23B  2    1.201677    0.446527    0.534298    11.00000   -1.50000
H23C  2    1.256555    0.362781    0.513749    11.00000   -1.50000
AFIX   0
C24   1    1.015665    0.074963    0.672150    11.00000    0.02631    0.02070 =
         0.03846   -0.00274   -0.00553    0.00472
AFIX  43
H24   2    1.048914    0.023091    0.675161    11.00000   -1.20000
AFIX   0
C25   1    0.355295    0.227219    0.744167    11.00000    0.02553    0.02438 =
         0.03761   -0.00946    0.00791   -0.00646
AFIX  23
H25A  2    0.245138    0.243352    0.727404    11.00000   -1.20000
H25B  2    0.343664    0.175152    0.760643    11.00000   -1.20000
AFIX   0
C26   1    0.615754    0.691102    0.503929    11.00000    0.06736    0.02721 =
         0.03628    0.00591    0.00699    0.01205
AFIX 137
H26A  2    0.535649    0.679656    0.536048    11.00000   -1.50000
H26B  2    0.579847    0.737443    0.483098    11.00000   -1.50000
H26C  2    0.728753    0.698850    0.520830    11.00000   -1.50000
AFIX   0
C27   1    0.440716    0.613830    0.434450    11.00000    0.06525    0.03799 =
         0.03854    0.01422   -0.00632    0.01230
AFIX 137
H27A  2    0.361692    0.602728    0.466972    11.00000   -1.50000
H27B  2    0.441261    0.571285    0.406152    11.00000   -1.50000
H27C  2    0.405258    0.660461    0.413921    11.00000   -1.50000
AFIX   0
C28   1    0.736985    0.647038    0.409209    11.00000    0.08202    0.04861 =
         0.04847    0.02453    0.03658    0.02302
AFIX 137
H28A  2    0.692255    0.692413    0.389213    11.00000   -1.50000
H28B  2    0.743884    0.604935    0.380611    11.00000   -1.50000
H28C  2    0.850028    0.658055    0.424920    11.00000   -1.50000
AFIX   0
C29   1    0.009474    0.088121    0.891993    11.00000    0.03674    0.05228 =
         0.05680    0.03536    0.01323    0.00959
AFIX  23
H29A  2    0.017217    0.043202    0.865434    11.00000   -1.20000
H29B  2    0.065890    0.075450    0.930132    11.00000   -1.20000
AFIX   0
C30   1    0.600545    0.507075    0.762331    11.00000    0.09433    0.04640 =
         0.05794   -0.00953    0.00515   -0.01049
AFIX  23
H30A  2    0.583133    0.560710    0.774542    11.00000   -1.20000
H30B  2    0.687060    0.483694    0.788474    11.00000   -1.20000
AFIX   0
HKLF 4

REM  mo_mk373_0m_a.res in P2(1)2(1)2(1)
REM R1 =  0.0634 for    4196 Fo > 4sig(Fo)  and  0.0733 for all    4786 data
REM    350 parameters refined using      0 restraints

END

WGHT      0.0897      5.3158

REM Highest difference peak  1.412,  deepest hole -0.844,  1-sigma level  0.086
Q1    1   0.4871  0.5299  0.7278  11.00000  0.05    1.41
Q2    1  -0.1469  0.1015  0.9460  11.00000  0.05    1.33
Q3    1  -0.1629  0.0693  0.8768  11.00000  0.05    0.79
Q4    1  -0.0869  0.0358  0.8631  11.00000  0.05    0.39
Q5    1   0.0146  0.1547  0.8843  11.00000  0.05    0.37
Q6    1   0.0096  0.1410  0.8337  11.00000  0.05    0.37
Q7    1   0.0074  0.1181  0.9335  11.00000  0.05    0.33
Q8    1   0.4862  0.2983  0.7737  11.00000  0.05    0.31
Q9    1   0.5096  0.6649  0.4865  11.00000  0.05    0.30
Q10   1   0.7810  0.5210  0.7198  11.00000  0.05    0.29
Q11   1   0.8167  0.6699  0.4446  11.00000  0.05    0.28
Q12   1   1.0025  0.3344  0.7323  11.00000  0.05    0.28
Q13   1   0.8386  0.0378  0.7751  11.00000  0.05    0.28
Q14   1   0.3877  0.2338  0.7123  11.00000  0.05    0.28
Q15   1   0.5773  0.6125  0.4088  11.00000  0.05    0.28
Q16   1   0.7551  0.1850  0.7146  11.00000  0.05    0.27
Q17   1   0.8820  0.2844  0.4876  11.00000  0.05    0.27
Q18   1   0.4831  0.2627  0.8074  11.00000  0.05    0.27
Q19   1   0.9021  0.3891  0.7273  11.00000  0.05    0.26
Q20   1   0.9561  0.3576  0.7602  11.00000  0.05    0.26
;
_shelx_res_checksum   47813

_shelx_hkl_file
;
   1   0   0  -10.10    1.60
  -1   0   0  -11.50    1.60
   2   0   0 6844.71  292.57
  -2   0   0 7042.70  292.77
   3   0   0   -1.10    3.40
  -3   0   0   -0.50    3.10
  -4   0   0  261.67   15.20
  -5   0   0   -2.00    4.90
  -6   0   0  722.63   36.50
  -7   0   0    8.60    7.40
  -8   0   0  216.78   19.60
   0   1   0    0.30    0.50
   0  -1   0   -0.20    0.60
   1   1   0 5025.90  211.18
   1  -1   0 5025.80  210.58
  -1  -1   0 4870.51  210.98
   2   1   0 1284.17   54.89
  -2   1   0 1274.27   55.49
  -2  -1   0 1262.37   54.99
   3  -1   0  238.38   13.40
  -3  -1   0  232.18   13.10
   3   1   0  249.08   13.00
  -4  -1   0 1529.75   69.99
  -4   1   0 1650.03   70.69
  -5  -1   0  450.05   23.70
  -5   1   0  427.06   23.80
  -6  -1   0  184.08   15.20
  -6   1   0  185.08   15.80
  -7   1   0   64.59   10.80
  -7  -1   0   66.79   10.60
  -8  -1   0  154.28   17.10
  -1  -2   0  248.48   11.30
   1  -2   0  266.97   12.40
   1   2   0  245.48   11.20
   2  -2   0  120.89    8.50
   2   2   0  118.09    7.10
  -2  -2   0  125.39    7.60
  -3  -2   0   78.19    6.90
   3   2   0   77.69    6.50
   3  -2   0   87.29    7.90
  -4  -2   0    8.80    4.30
  -4   2   0    4.90    5.30
  -5  -2   0 1303.97   58.19
  -5   2   0 1259.07   58.99
  -6  -2   0   55.89    8.70
  -6   2   0   52.49    9.20
  -7  -2   0   97.19   11.80
  -8  -2   0    8.10    8.50
  -9  -2   0   14.40    9.90
   0   3   0    0.00    0.50
   0  -3   0   -0.40    3.90
   1   3   0  127.39    6.20
  -1  -3   0  125.19    6.30
  -2  -3   0  455.35   21.40
   2  -3   0  480.25   22.80
   2   3   0  483.15   21.20
  -3  -3   0  102.09    7.10
   3  -3   0   76.99    7.90
   3   3   0   94.69    6.60
   4   3   0 2318.77  101.19
  -4  -3   0 2357.76  101.49
  -4   3   0 2365.56  102.79
  -5   3   0   -2.50    5.40
  -5  -3   0   -4.90    4.70
  -6  -3   0    4.00    6.00
  -7  -3   0   -1.00    7.10
  -8  -3   0  149.79   16.40
  -9  -3   0   37.10   11.30
  -1  -4   0  107.69    5.60
  -2  -4   0  160.48    8.80
   2  -4   0  163.98   10.50
   2   4   0  180.28    8.50
   3   4   0   23.20    3.40
  -3  -4   0   21.40    3.70
  -4  -4   0 1027.70   46.10
   4   4   0 1026.10   45.60
  -5  -4   0  722.23   34.50
  -6  -4   0  411.26   23.10
  -7  -4   0   58.89    9.90
  -8  -4   0   23.80    8.90
  -9  -4   0   86.19   13.80
   0  -5   0    1.70    6.10
   0   5   0   -0.10    0.70
  -1  -5   0 3902.71  164.98
   2   5   0   49.90    3.80
  -2  -5   0   43.30    4.30
   2  -5   0   52.99    6.30
   3   5   0  538.75   24.00
  -3  -5   0  525.35   24.50
   4   5   0 1343.57   59.19
  -4  -5   0 1374.86   59.89
  -5  -5   0   99.29    9.40
  -6  -5   0   96.29   10.30
  -7  -5   0  455.45   26.10
  -8  -5   0   55.19   10.80
  -9  -5   0   23.40   10.20
  -1  -6   0  686.03   29.70
  -2  -6   0 2294.57   96.49
   2  -6   0 2244.18   98.49
  -3  -6   0   72.19    5.80
   3   6   0   61.19    4.80
   4   6   0 1310.87   57.89
  -4  -6   0 1353.16   58.69
  -5  -6   0    8.40    4.90
  -6  -6   0   41.30    7.50
  -7  -6   0  103.69   11.80
  -8  -6   0  245.08   19.10
  -9  -6   0   18.50    9.90
   0   7   0    0.60    3.60
   0  -7   0   -1.90    6.30
  -1  -7   0 1269.27   63.79
   1  -7   0 1255.27   63.09
  -1   7   0 1301.97   63.79
   1   7   0 1339.37   65.09
  -2  -7   0   12.60    2.50
  -3  -7   0   10.00    3.10
   3   7   0   17.80    2.60
  -4  -7   0   27.30    4.60
   4   7   0   24.50    3.50
  -5  -7   0   -0.90    4.00
  -6  -7   0  104.59   10.70
  -7  -7   0    4.80    6.60
  -8  -7   0  254.87   19.50
   0   8   0   14.20    7.80
   0  -8   0    9.60    7.30
   1  -8   0   -2.90    6.70
  -1  -8   0   -0.80    7.20
  -1   8   0    2.50    7.20
   1   8   0    0.10    7.10
  -2  -8   0  210.88   10.60
  -3  -8   0  276.17   13.80
  -4  -8   0  128.59    9.10
   4   8   0  139.09    8.00
  -5  -8   0  122.69   10.20
  -6  -8   0   59.99    8.20
  -7  -8   0  359.86   21.90
  -8  -8   0   99.19   12.40
   0   9   0    2.80    7.00
   0  -9   0   -1.10    7.00
  -1   9   0 2578.24  118.49
   1  -9   0 2393.86  116.89
   1   9   0 2583.04  119.39
  -2  -9   0  271.87   13.20
  -3  -9   0   -1.20    1.90
  -4  -9   0   38.90    5.30
  -5  -9   0  182.78   12.50
  -6  -9   0   71.99    8.80
  -7  -9   0  145.89   13.70
  -8  -9   0   12.40    7.80
   0  10   0  905.61   51.19
   0 -10   0  868.11   50.09
   1 -10   0  344.17   27.50
  -1  10   0  386.26   29.50
  -1 -10   0  334.97   27.20
   1  10   0  405.86   30.60
  -2 -10   0   -0.30    1.60
  -3 -10   0  304.47   15.10
  -4 -10   0  538.45   25.60
  -5 -10   0   58.09    7.30
  -6 -10   0   79.79    9.20
  -7 -10   0  440.56   24.90
  -8 -10   0   98.39   17.40
   0 -11   0   16.10    9.90
   0  11   0   23.60   11.00
  -1 -11   0   -1.50    8.00
   1  11   0    2.80   10.20
  -1  11   0    5.00    9.70
   1 -11   0   -2.30    7.90
  -2 -11   0  254.47   12.80
  -3 -11   0   54.29    5.30
  -4 -11   0  659.13   30.80
  -5 -11   0  382.66   20.30
  -6 -11   0  205.58   14.50
  -7 -11   0   90.59   10.70
   0 -12   0  476.65   35.10
  -1  12   0   83.29   17.50
   1 -12   0   94.39   17.40
  -1 -12   0   76.29   16.60
  -2 -12   0   26.70    3.80
  -3 -12   0  820.62   36.90
  -4 -12   0    8.40    4.00
  -5 -12   0   89.49    8.70
  -6 -12   0   62.99    8.40
   7  12   0   51.19   17.40
   0  13   0    5.30    8.10
   0 -13   0   14.00    9.60
  -1  13   0 1504.85   77.29
  -1 -13   0 1286.17   73.59
   1 -13   0 1265.57   72.59
  -2 -13   0  149.09    9.10
  -3 -13   0   -0.90    3.20
  -4 -13   0   45.80    6.00
  -5 -13   0   49.99    7.00
  -6 -13   0   19.80    6.20
   7  13   0  331.87   35.60
   0  14   0  415.86   35.80
  -1  14   0   50.29   16.60
   1  14   0   41.80   15.60
  -2 -14   0  486.25   23.00
  -3 -14   0    8.50    3.80
  -4 -14   0   93.19    8.60
  -5 -14   0  403.56   21.30
   6  14   0   72.99   21.50
   0  15   0   12.30   13.70
  -1  15   0   15.80   14.00
   1  15   0    8.90   12.60
  -2 -15   0    0.50    3.10
  -3 -15   0   18.60    4.40
  -4 -15   0    6.30    4.30
   5  15   0  120.09   24.80
   6  15   0   35.70   17.20
   0  16   0  304.77   35.80
   1  16   0    4.20   13.20
  -1  16   0   -0.90   13.00
  -2 -16   0   12.30    3.80
  -3 -16   0  412.56   20.70
  -4 -16   0   70.29    8.80
   5  16   0  474.75   46.10
   6  16   0   14.00   15.50
   0  17   0   -4.90   13.60
  -1 -17   0   -0.30    3.80
  -2 -17   0   -1.90    3.30
  -3 -17   0  158.08   10.90
   4  17   0   69.99   23.50
  -4  17   0   46.60   20.00
   5  17   0   38.20   20.40
   0  18   0 1335.27   84.49
  -1 -18   0   23.70    5.20
  -2 -18   0    3.00    4.00
   3  18   0    9.80   18.30
  -3  18   0    4.10   16.10
  -4  18   0   96.79   25.20
   0  19   0   17.80   22.00
  -1 -19   0    5.50    4.50
  -2  19   0   21.60   20.30
  -3  19   0   68.39   28.90
  -1 -20   0   -6.10    4.50
   0   0  -1   -3.20    0.10
   0   0   1   -3.10    0.20
  -1   0  -1  140.29    7.80
   1   0  -1  172.68    8.00
   1   0   1  148.39    7.80
  -2   0  -1  697.73   32.10
   2   0   1  722.13   32.00
  -2   0   1  750.32   32.30
   2   0  -1  712.73   32.00
   3   0   1   16.70    4.00
  -3   0  -1   18.70    4.60
   3   0  -1   11.20    3.70
  -4   0  -1    5.90    4.30
  -4   0   1   10.10    5.00
  -5   0   1 1057.29   49.99
  -5   0  -1 1090.99   49.90
  -6   0  -1   -7.30    6.10
  -6   0   1   12.30    6.80
  -7   0  -1   21.10    8.20
  -7   0   1    9.10    8.40
  -8   0   1    5.10    9.40
  -1  -1  -1 2378.96  101.59
   1   1  -1 2465.25  101.19
  -1   1   1 2382.66  101.49
   1  -1  -1 2420.16  101.49
   1   1   1 2319.17  101.89
  -1  -1   1 2395.56  101.19
  -2   1   1 1040.10   46.60
  -2  -1  -1 1076.59   46.20
   2  -1   1 1050.59   46.60
   2   1  -1 1085.59   46.20
   2   1   1 1075.69   46.10
  -2   1  -1 1028.00   46.60
  -2  -1   1 1071.99   46.40
  -3  -1  -1 1785.52   75.79
   3   1  -1 1743.03   75.59
   3  -1   1 1767.72   75.99
   3  -1  -1 1729.23   75.99
   3   1   1 1712.03   75.49
  -4  -1  -1  246.38   14.80
  -4   1   1  258.17   15.70
  -4   1  -1  246.68   15.40
  -4  -1   1  269.97   15.10
  -5   1   1  707.83   34.30
  -5  -1  -1  675.53   33.40
  -5  -1   1  691.13   33.50
  -5   1  -1  655.63   33.60
  -6  -1  -1  208.68   15.70
  -6   1   1  186.98   16.30
  -6   1  -1  211.08   16.30
  -6  -1   1  197.28   15.90
  -7  -1  -1   -3.60    6.80
  -7   1   1   10.70    8.40
  -7  -1   1    2.50    7.20
  -8   1   1   16.20    9.90
  -8  -1   1   19.20    8.80
  -9  -1   1  114.19   16.00
   0   2  -1  261.47   14.20
  -1  -2  -1  260.57   12.10
   1   2  -1  274.27   12.40
  -1   2   1  262.87   13.30
  -1  -2   1  279.27   12.50
   1  -2  -1  285.57   13.30
   1   2   1  281.37   12.10
   2   2  -1 1385.26   58.59
   2  -2   1 1350.66   59.29
  -2  -2  -1 1344.77   58.49
   2  -2  -1 1371.66   59.29
  -2  -2   1 1344.47   58.69
   2   2   1 1374.06   58.29
  -3  -2  -1 1028.40   44.40
   3   2  -1 1043.80   44.40
   3   2   1 1013.40   44.10
  -3  -2   1  924.91   44.40
   3  -2  -1 1002.70   45.10
  -4  -2  -1  670.63   30.70
  -4   2   1  643.04   31.80
  -4   2  -1  660.43   31.60
  -4  -2   1  620.04   30.50
   4   2   1  637.84   30.00
  -5   2   1  238.18   16.40
  -5  -2  -1  242.68   15.20
  -5   2  -1  216.48   16.10
  -5  -2   1  224.68   15.10
  -6  -2  -1  369.76   22.40
  -6   2   1  401.86   23.70
  -6  -2   1  408.16   23.20
  -7   2   1  328.87   23.00
  -7  -2  -1  300.87   20.90
  -7  -2   1  318.27   21.30
  -8  -2  -1    9.10    8.30
  -8  -2   1    5.30    8.80
  -9  -2   1   58.69   13.30
   0  -3  -1  248.88   15.30
   0  -3   1  219.08   14.20
   1   3  -1  933.21   38.80
  -1  -3  -1  905.81   38.50
   1  -3  -1  909.81   39.80
   1   3   1  903.51   38.40
  -1  -3   1  873.01   38.80
  -2   3   1  575.64   27.60
  -2  -3  -1  586.44   26.10
   2   3  -1  614.74   26.30
   2  -3   1  597.94   27.60
   2   3   1  588.54   26.00
  -2  -3   1  587.04   26.40
   2  -3  -1  592.54   27.40
   3   3  -1  475.45   22.10
  -3  -3  -1  458.75   22.20
   3  -3   1  468.05   23.60
   3   3   1  480.15   22.00
   3  -3  -1  514.15   25.00
  -3  -3   1  468.95   22.40
  -4   3   1  303.17   18.10
  -4  -3  -1  305.07   16.70
   4   3   1  322.27   16.30
  -4  -3   1  331.27   17.10
  -5   3   1  264.07   18.20
  -5  -3  -1  286.57   16.90
  -5  -3   1  283.57   16.90
  -6  -3  -1   19.60    6.80
  -6   3   1   18.00    8.40
  -6  -3   1   19.40    7.00
  -7   3   1   45.90   11.20
  -7  -3  -1   64.99   10.20
  -7  -3   1   49.90    9.80
  -8  -3  -1  116.69   14.40
  -8  -3   1  127.09   15.60
  -9  -3   1  141.49   16.60
   0   4   1  392.86   22.10
  -1  -4  -1 9488.45  409.16
  -1  -4   1 9999.00  410.96
   1  -4  -1 9644.74  408.76
   2  -4   1  685.63   32.80
   2   4  -1  716.13   31.30
  -2  -4  -1  718.43   31.20
   2   4   1  736.43   31.00
  -2  -4   1  710.53   31.50
   2  -4  -1  724.43   33.00
  -3  -4  -1  608.84   27.40
   3   4  -1  623.94   27.30
  -3  -4   1  573.54   27.50
   3   4   1  606.34   27.00
  -4   4   1   33.30    6.40
  -4  -4  -1   31.10    4.90
  -4  -4   1   43.70    5.90
   4   4   1   43.00    4.90
  -5   4   1  291.47   19.20
  -5  -4  -1  294.77   17.10
  -5  -4   1  297.47   17.30
  -6  -4  -1   51.99    8.30
  -6   4   1   36.50    8.80
  -6  -4   1   51.89    8.40
  -7  -4  -1  407.56   24.60
  -7  -4   1  428.46   25.10
  -8  -4  -1  542.95   30.70
  -8  -4   1  508.45   30.70
  -9  -4   1   91.49   14.40
   0  -5   1  910.41   45.20
   0  -5  -1  919.81   45.70
  -1  -5  -1  193.98    9.10
  -1  -5   1  206.88    9.60
   1  -5  -1  197.68   11.30
   2   5  -1  152.58    7.50
  -2  -5  -1  139.49    7.40
  -2  -5   1  125.59    7.70
   2   5   1  136.99    6.90
   2  -5  -1  140.39   10.00
  -3  -5  -1  355.76   16.50
   3   5  -1  357.66   16.20
   3   5   1  366.26   15.90
  -3  -5   1  275.07   16.30
   4   5   1  265.37   14.10
  -4  -5   1  298.87   15.50
  -5  -5  -1  203.68   13.50
  -5  -5   1  213.78   13.80
  -6  -5  -1  324.67   19.80
  -6  -5   1  348.57   20.20
  -7  -5  -1  352.16   22.20
  -7  -5   1  368.46   22.50
  -8  -5  -1  331.37   23.40
  -8  -5   1  378.76   24.00
  -9  -5  -1   49.50   11.20
  -9  -5   1   83.49   13.70
  -1  -6   1  360.26   16.30
  -2  -6  -1 1940.31   84.99
   2   6  -1 2097.29   85.09
  -2  -6   1 2036.00   85.39
   2  -6  -1 1927.01   87.09
  -3  -6  -1  911.21   40.40
   3   6  -1  932.31   40.20
   3   6   1  911.61   39.80
  -4  -6   1  777.22   36.00
   4   6   1  791.32   34.90
  -5  -6  -1  123.09   10.10
  -5  -6   1  122.19   10.40
  -6  -6  -1  314.17   19.10
  -6  -6   1  333.17   19.70
  -7  -6  -1   21.60    7.60
  -7  -6   1   25.90    8.00
  -8  -6  -1  247.98   19.70
  -8  -6   1  292.87   20.90
  -9  -6  -1  342.57   24.00
  -9  -6   1  340.37   24.50
   1  -7   1  137.59   15.40
  -1   7   1  144.29   15.20
   1   7  -1  137.39   16.50
  -1  -7  -1  147.39   15.60
  -1   7  -1  136.99   15.60
  -1  -7   1  126.99   15.20
   1  -7  -1  128.69   15.30
   1   7   1  133.49   17.00
  -2  -7  -1  782.12   33.90
  -2  -7   1  776.02   34.30
   3   7  -1  289.17   14.10
  -3  -7  -1  288.47   14.40
   3   7   1  300.97   13.70
   4   7   1  153.98    8.60
  -4  -7   1  148.29   10.20
  -5  -7  -1  152.98   11.20
  -5  -7   1  149.39   11.60
  -6  -7  -1   77.49    9.00
  -6  -7   1   92.29    9.80
  -7  -7  -1  421.16   24.10
  -7  -7   1  414.06   24.60
  -8  -7  -1   17.60    8.10
  -8  -7   1    9.70    8.20
   0  -8   1  200.58   19.30
   0   8   1  217.98   19.80
   0  -8  -1  213.98   19.70
  -1   8   1  215.88   20.10
  -1  -8  -1  219.58   20.40
   1  -8   1  218.58   19.30
   1   8  -1  223.18   21.20
  -1   8  -1  202.48   20.30
  -1  -8   1  218.18   20.00
   1  -8  -1  234.28   20.10
   1   8   1  220.28   21.20
  -2  -8  -1  897.81   38.40
  -2  -8   1  870.51   38.70
  -3  -8  -1  129.39    8.00
   3   8  -1  138.49    7.70
  -4  -8   1   43.60    5.50
  -5  -8  -1   33.10    5.90
  -5  -8   1   36.60    6.30
  -6  -8  -1   16.10    5.90
  -6  -8   1   12.80    5.90
  -7  -8  -1  296.67   19.10
  -7  -8   1  287.57   19.60
  -8  -8  -1  420.26   25.20
  -8  -8   1  400.26   25.70
   0   9   1  598.04   37.30
   0   9  -1  600.14   36.90
   0  -9  -1  556.84   35.70
   0  -9   1  578.14   36.10
   1  -9   1   59.39   12.30
  -1   9   1   59.89   12.80
  -1  -9  -1   53.39   11.90
   1   9  -1   59.89   14.00
   1   9   1   51.19   12.60
   1  -9  -1   54.69   12.40
  -1  -9   1   55.69   12.70
  -1   9  -1   72.99   14.60
  -3  -9  -1  149.39    8.60
  -3  -9   1  141.79    9.00
  -4  -9   1  321.87   17.50
   4   9   1  345.57   15.90
  -5  -9  -1  587.74   27.70
  -5  -9   1  546.05   27.90
  -6  -9  -1   16.70    5.80
  -6  -9   1    9.30    5.80
  -7  -9  -1  124.89   12.30
  -7  -9   1  104.29   11.90
  -8  -9  -1   22.00    8.10
  -8  -9   1   43.00    9.40
   0 -10   1   -2.10    6.80
   0 -10  -1    6.00    8.40
   0  10  -1   -5.20    7.20
   0  10   1    0.70    7.80
   1 -10   1  330.97   26.00
  -1 -10  -1  318.47   26.50
  -1  10   1  322.47   26.60
   1  10  -1  340.97   28.00
  -1  10  -1  300.07   26.60
  -1 -10   1  279.97   25.10
   1  10   1  293.17   26.20
   1 -10  -1  294.77   25.30
  -2 -10  -1  488.45   22.30
  -2 -10   1  500.85   22.80
  -3 -10   1  818.72   36.80
  -4 -10  -1  198.58   11.60
  -4 -10   1  200.38   12.30
  -5 -10  -1   65.19    7.20
  -5 -10   1   51.49    7.30
  -6 -10  -1   55.59    7.70
  -6 -10   1   32.80    7.40
  -7 -10  -1   63.49    9.10
  -7 -10   1   51.59    9.00
  -8 -10   1  140.09   14.50
   0  11  -1  440.46   33.00
   0  11   1  486.85   34.40
   0 -11   1  423.06   31.80
   0 -11  -1  393.36   31.60
   1  11  -1  287.47   27.80
  -1 -11  -1  281.67   26.00
  -1  11   1  307.47   27.20
   1 -11   1  251.77   24.50
   1  11   1  285.77   27.40
   1 -11  -1  279.97   25.40
  -1  11  -1  297.67   27.30
  -1 -11   1  272.97   24.80
  -4 -11  -1   46.20    5.50
  -4 -11   1   37.30    5.70
  -5 -11  -1   76.19    7.80
  -5 -11   1   78.89    8.30
  -6 -11  -1   55.69    7.50
  -6 -11   1   39.60    7.50
  -7 -11  -1  184.78   16.80
  -7 -11   1  200.18   15.80
   0 -12  -1   18.50   11.10
   0 -12   1   23.30   11.10
   0  12   1   11.80    9.90
   1 -12   1   62.99   14.00
  -1  12   1  115.79   20.40
  -1 -12  -1   73.99   16.20
   1  12  -1  102.89   19.70
   1 -12  -1   89.99   17.50
  -1  12  -1   99.39   19.20
  -1 -12   1   80.09   15.80
  -2 -12  -1  962.90   42.90
  -2 -12   1  997.80   43.40
  -3 -12  -1  143.19    8.90
  -3 -12   1  158.78    9.80
  -4 -12  -1  623.44   29.20
  -4 -12   1  628.24   29.80
  -5 -12  -1   72.89    7.50
  -5 -12   1   63.79    7.80
  -6 -12  -1   41.00    6.90
  -6 -12   1   35.30    7.30
  -7 -12   1    1.50    6.50
   0  13   1   47.30   14.80
  -1  13   1  115.49   21.20
   1 -13   1  124.79   20.30
  -1 -13  -1  109.59   18.80
   1  13  -1   97.49   20.00
  -1  13  -1  144.69   23.30
   1 -13  -1  130.19   21.40
  -1 -13   1  111.79   20.00
  -2 -13  -1    5.40    2.90
  -2 -13   1    8.70    3.40
  -3 -13  -1  185.48   11.10
  -3 -13   1  205.98   11.70
  -4 -13  -1  291.27   15.50
  -4 -13   1  274.17   15.90
  -5 -13  -1   19.50    5.10
  -5 -13   1   25.80    5.90
  -6 -13   1   90.79   10.20
   7  13  -1   27.80   17.30
   7  13   1   24.80   15.40
   0  14  -1   12.60   11.40
   0  14   1   11.20   11.80
  -1  14   1  372.46   34.40
   1  14  -1  427.26   37.10
   1  14   1  378.26   35.10
  -1  14  -1  379.56   35.90
  -2 -14  -1  102.29    7.30
  -2 -14   1  101.69    8.00
  -3 -14  -1  206.38   11.90
  -3 -14   1  213.48   12.40
  -4 -14  -1  245.08   14.00
  -4 -14   1  248.28   14.70
  -5 -14  -1   37.40    7.50
  -5 -14   1   48.90    7.20
   6  14  -1   91.09   22.90
   6  14   1  107.69   24.90
   0  15   1   86.29   21.40
   0  15  -1   80.39   18.90
   1  15  -1  181.88   26.70
  -1  15   1  172.58   28.20
  -1  15  -1  205.08   27.70
   1  15   1  208.98   28.40
  -2 -15  -1  137.69    8.80
  -2 -15   1  128.79    9.30
  -3 -15  -1    3.80    3.50
  -3 -15   1   16.40    4.50
  -4 -15  -1   26.10    5.00
  -4 -15   1   22.80    5.40
  -5 -15   1  129.59   11.60
   6  15  -1    7.50   14.20
   6  15   1   13.90   15.80
   0  16   1    1.00   13.60
   0  16  -1    8.10   13.50
  -1 -16   1    8.70    4.10
  -2 -16  -1  191.68   11.50
  -2 -16   1  207.48   12.10
  -3 -16  -1   58.09    6.30
  -3 -16   1   53.89    6.40
  -4 -16   1  192.98   13.00
   5  16  -1   57.89   20.10
   5  16   1   48.50   20.50
   6  16  -1  113.99   26.20
   6  16   1  107.69   26.20
   0  17   1    7.50   14.90
   0  17  -1  -11.70   12.30
  -1 -17   1   41.50    5.90
  -2 -17  -1  129.59    9.20
  -2 -17   1  131.39    9.90
  -3 -17   1  139.09   10.60
   4  17  -1   34.00   19.10
  -4  17   1   42.30   19.20
   4  17   1   12.80   16.80
  -4  17  -1   24.40   17.10
   5  17  -1   16.00   17.20
   5  17   1    6.00   15.80
   0  18  -1  476.25   46.60
   0  18   1  484.45   47.30
  -1 -18  -1   95.59    8.20
  -1 -18   1   75.49    7.90
  -2 -18  -1   53.59    6.20
  -2 -18   1   58.99    6.90
  -3 -18   1    5.20    5.50
  -4  18   1   68.79   21.80
  -4  18  -1   85.89   24.70
   0  19  -1   34.60   25.60
   0  19   1   53.09   32.80
  -1 -19  -1  101.59    9.20
  -1 -19   1  108.49    9.80
  -2 -19   1   44.50    6.60
  -3  19   1   43.20   20.60
  -1 -20   1   57.99    7.30
   0   0   2 2081.29   88.39
   1   0  -2 2060.79   87.39
   2   0  -2 4261.57  182.38
  -2   0   2 4395.86  182.48
   2   0   2 4273.37  182.28
   3   0   2 2606.04  113.49
   3   0  -2 2657.93  113.69
  -3   0  -2 2690.73  113.79
  -4   0  -2  250.37   15.20
  -4   0   2  264.57   15.20
  -5   0   2  285.17   18.00
  -5   0  -2  276.77   17.50
  -6   0   2    2.40    7.00
  -7   0   2  279.87   20.90
  -8   0   2  189.58   19.10
  -9   0   2   41.20   12.00
   0   1   2 3076.59  132.39
   0  -1  -2 3166.48  131.99
   1   1  -2  850.51   36.00
  -1   1   2  807.72   36.20
   1   1   2  827.62   35.60
  -1  -1   2  809.72   35.90
   1  -1  -2  866.31   36.30
  -2  -1  -2  617.44   27.40
   2  -1   2  610.34   27.90
   2   1  -2  601.34   27.50
   2  -1  -2  595.04   27.80
   2   1   2  632.34   27.30
  -2  -1   2  618.84   27.70
  -3  -1  -2  118.89    8.40
   3  -1   2  126.19    8.60
   3   1  -2  106.39    8.00
   3  -1  -2  103.49    8.10
   3   1   2  106.99    7.60
  -4   1   2    5.10    5.20
  -4  -1  -2   12.30    4.60
   4   1   2   17.00    4.10
  -4  -1   2    8.00    4.50
  -5  -1  -2  231.18   14.90
  -5   1   2  206.78   15.00
  -5  -1   2  215.58   15.20
  -6  -1  -2  193.88   15.20
  -6   1   2  197.18   16.70
  -6  -1   2  219.18   16.30
  -7   1   2   54.89   11.00
  -7  -1   2   48.70   10.80
  -8   1   2   12.80    9.50
  -8  -1   2   18.80   10.10
  -9   1   2  134.19   18.00
  -9  -1   2  127.19   17.60
   0  -2  -2 4478.45  186.48
   0   2   2 4356.06  186.38
  -1  -2  -2 5345.07  235.78
  -1   2   2 5705.23  238.48
   1   2  -2 5843.92  237.28
  -1  -2   2 5525.95  237.98
   1   2   2 5431.66  235.68
   1  -2  -2 5725.23  235.88
   2  -2   2 1312.17   56.19
   2   2  -2 1305.97   55.39
  -2  -2  -2 1282.37   55.09
  -2   2   2 1217.78   56.09
   2   2   2 1258.07   54.99
   2  -2  -2 1342.97   56.19
  -2  -2   2 1272.07   55.59
  -3  -2  -2  640.14   28.70
   3  -2   2  632.64   29.50
   3   2  -2  630.04   28.60
   3   2   2  633.64   28.30
   3  -2  -2  592.94   29.30
  -4   2   2 1490.25   66.79
  -4  -2  -2 1497.15   65.59
   4   2   2 1494.35   65.19
  -4  -2   2 1475.75   65.89
  -5  -2  -2  987.60   46.60
  -5   2   2  994.70   47.60
  -5  -2   2 1038.60   47.10
  -6   2   2 1009.40   50.19
  -6  -2  -2 1065.59   49.30
  -6  -2   2 1050.49   49.70
  -7   2   2   69.19   11.50
  -7  -2  -2   55.49   10.00
  -7  -2   2   78.39   11.70
  -8   2   2   -3.30    8.20
  -8  -2   2    4.80    8.40
  -9  -2   2   49.10   12.70
   0  -3  -2   85.19    5.00
  -1  -3  -2 1276.57   53.49
   1   3  -2 1329.47   54.19
  -1   3   2 1253.77   54.99
  -1  -3   2 1250.97   54.19
   1  -3  -2 1238.18   54.79
  -2  -3  -2 1399.16   61.39
   2   3  -2 1485.35   61.79
  -2   3   2 1442.06   63.09
   2  -3  -2 1432.46   62.79
   2   3   2 1435.26   61.29
  -2  -3   2 1444.56   61.99
  -3  -3  -2   72.59    6.40
   3  -3   2   71.89    8.20
   3   3  -2   69.19    6.00
   3   3   2   66.89    5.60
  -4   3   2  312.27   17.90
  -4  -3   2  303.47   16.60
   4   3   2  284.87   15.30
  -5  -3  -2   55.09    7.50
  -5   3   2   84.19   10.20
  -5  -3   2   57.59    7.70
  -6  -3  -2  134.99   12.40
  -6   3   2  114.69   13.40
  -6  -3   2  107.79   11.40
  -7   3   2   79.89   12.60
  -7  -3  -2  104.29   11.60
  -7  -3   2  115.99   13.20
  -8   3   2   57.59   11.90
  -8  -3   2   63.99   11.60
  -9  -3   2  115.39   16.20
   0  -4  -2 2246.28   95.29
  -1   4   2  255.57   13.50
  -1  -4  -2  260.97   11.30
   1  -4  -2  249.18   13.30
  -1  -4   2  266.17   12.20
  -2   4   2 1701.93   74.59
  -2  -4  -2 1692.03   72.69
   2   4  -2 1784.92   73.09
   2   4   2 1698.43   72.49
   2  -4  -2 1730.53   74.49
  -2  -4   2 1663.93   73.29
  -3   4   2  163.08   12.20
   3   4  -2  179.18    9.60
  -3  -4  -2  160.58    9.50
   3   4   2  160.48    8.90
  -4  -4   2  420.96   20.80
   4   4   2  392.86   19.50
  -5   4   2   67.29    9.40
  -5  -4  -2   40.70    6.60
  -5  -4   2   38.40    6.60
  -6   4   2  172.08   16.80
  -6  -4  -2  192.98   14.20
  -6  -4   2  219.68   15.30
  -7   4   2   37.80   10.70
  -7  -4  -2   50.59    9.40
  -7  -4   2   52.79   10.00
  -8  -4  -2   95.19   12.80
  -8  -4   2  116.29   14.60
  -9  -4   2   27.60   11.20
   0  -5  -2 1085.79   50.59
   0   5   2  932.21   49.30
   0  -5   2 1015.50   49.50
  -1  -5  -2  350.46   15.30
  -1  -5   2  355.26   16.10
   1  -5  -2  353.96   17.40
   2   5  -2  182.08    8.90
  -2  -5  -2  176.38    8.50
   2   5   2  166.48    8.00
   2  -5  -2  165.98   11.10
  -2  -5   2  169.08    9.20
  -3  -5  -2  128.39    8.20
  -3   5   2  138.49   11.00
   3   5  -2  156.78    8.30
   3   5   2  128.79    7.40
  -4   5   2  850.21   44.20
  -4  -5   2  991.50   43.20
   4   5   2  988.70   41.90
  -5  -5  -2  373.66   19.90
  -5  -5   2  372.16   20.50
  -6   5   2  205.78   17.30
  -6  -5  -2  210.38   14.70
  -6  -5   2  233.18   15.90
  -7  -5  -2   22.40    7.40
  -7  -5   2   19.50    7.80
  -8  -5  -2   13.00    7.90
  -8  -5   2   19.20    9.10
  -9  -5   2  117.49   15.60
   1  -6  -2 1733.73   74.89
  -1  -6   2 1720.23   73.59
   2   6  -2 1843.12   77.09
  -2  -6  -2 1767.02   76.59
   2  -6  -2 1835.22   78.99
  -2  -6   2 1783.72   77.29
   3   6  -2   32.50    3.70
  -3  -6  -2   40.80    4.10
   3   6   2   34.00    3.20
  -3  -6   2   19.20    3.80
   4   6   2  379.96   18.10
  -4  -6   2  388.56   19.70
  -5  -6  -2  364.96   18.90
  -5  -6   2  335.57   19.40
  -6  -6  -2   66.09    8.80
  -6  -6   2   77.29    9.30
  -7  -6  -2   62.39    9.80
  -7  -6   2   76.09   10.90
  -8  -6  -2   83.99   11.80
  -8  -6   2  111.29   14.10
   0  -7   2  784.52   43.20
   0  -7  -2  829.02   44.20
  -1  -7   2  314.67   14.40
   1  -7  -2  287.77   16.00
  -2  -7  -2   96.59    5.60
   3   7  -2   77.19    5.50
  -3  -7  -2   69.99    5.60
   3   7   2   71.39    4.60
  -3  -7   2   75.99    6.50
  -4  -7   2  427.46   21.20
   4   7   2  417.16   19.40
  -5  -7  -2 1026.10   46.60
  -5  -7   2 1035.70   47.40
  -6  -7  -2    9.60    5.80
  -6  -7   2   27.70    7.00
  -7  -7  -2    8.30    6.30
  -7  -7   2   17.80    7.70
  -8  -7  -2   27.50    8.40
  -8  -7   2   38.20   10.10
   0  -8  -2  267.67   21.50
   0   8   2  258.07   22.00
   0  -8   2  237.58   21.00
   1  -8  -2  867.91   39.60
  -3  -8  -2  466.35   21.70
   3   8  -2  493.25   22.00
  -3  -8   2  463.75   22.50
  -4  -8  -2   32.00    4.40
   4   8   2   49.30    4.20
  -4  -8   2   47.30    6.10
  -5  -8  -2   95.59    8.70
  -5  -8   2   86.19    8.70
  -6  -8  -2   99.19    9.90
  -6  -8   2   94.69   10.50
  -7  -8  -2  146.99   12.90
  -7  -8   2  129.89   13.80
  -8  -8  -2  163.78   14.80
  -8  -8   2  122.29   14.40
   0  -9   2  934.81   51.59
   0   9   2 1013.00   53.49
   0  -9  -2  907.01   51.59
   1  -9  -2  242.88   14.00
  -2  -9  -2  137.19    7.30
  -2  -9   2  127.49    8.10
  -3  -9  -2   80.79    5.90
  -3  -9   2   82.69    7.00
  -4  -9   2  377.16   19.60
   4   9   2  382.46   17.50
  -5  -9  -2  659.13   31.00
  -5  -9   2  656.83   32.00
  -6  -9  -2  153.28   11.70
  -6  -9   2  142.49   13.00
  -7  -9  -2   39.30    7.70
  -7  -9   2   27.40    8.10
  -8  -9   2    3.50    7.80
   0  10   2   83.19   15.80
   0  10  -2   64.89   13.30
   0 -10  -2   70.99   14.10
   0 -10   2   58.39   12.60
  -1  10   2  669.33   41.80
   1  10  -2  702.23   43.30
  -1 -10  -2  698.33   42.60
   1 -10   2  633.74   40.30
  -1  10  -2  692.33   42.00
   1  10   2  698.83   43.00
   1 -10  -2  648.64   40.80
  -1 -10   2  606.24   40.30
  -2 -10  -2  211.78   10.40
  -2 -10   2  207.78   11.30
  -3 -10  -2   20.80    3.20
  -3 -10   2   18.90    4.00
  -4 -10   2   62.59    6.90
  -5 -10  -2   94.39    8.40
  -5 -10   2   93.29    9.30
  -6 -10  -2   43.00    6.80
  -6 -10   2   42.10    7.90
  -7 -10  -2  190.58   14.40
  -7 -10   2  187.68   16.10
  -8 -10   2  200.88   17.60
   0  11   2  302.27   27.30
   0  11  -2  279.47   25.40
   0 -11   2  262.27   24.70
   0 -11  -2  261.97   25.20
   1 -11   2  366.66   29.30
  -1 -11  -2  347.17   29.90
   1  11  -2  414.36   32.80
  -1  11   2  382.56   31.00
   1 -11  -2  359.46   29.50
   1  11   2  395.46   30.90
  -1 -11   2  356.46   29.30
  -1  11  -2  381.66   31.00
  -2 -11  -2   96.19    5.90
  -2 -11   2   84.29    6.90
  -3 -11  -2  297.77   14.80
  -3 -11   2  312.17   15.90
  -4 -11   2   91.79    8.50
  -5 -11  -2  705.43   32.30
  -5 -11   2  675.73   33.30
  -6 -11  -2   37.80    6.50
  -6 -11   2   29.10    7.30
  -7 -11   2   75.39   10.70
   0  12   2  458.85   35.00
   0 -12  -2  406.56   32.50
   0 -12   2  380.56   31.70
  -1  12   2  658.63   42.80
   1  12  -2  684.33   45.00
   1 -12   2  645.44   41.80
  -1 -12  -2  602.64   41.90
   1 -12  -2  594.74   41.30
  -1  12  -2  633.44   43.40
  -1 -12   2  551.64   40.30
  -2 -12   2   26.10    4.20
  -3 -12   2   37.40    5.30
  -5 -12  -2   86.49    8.00
  -5 -12   2   98.59    9.70
  -6 -12   2   48.50    8.30
  -7 -12   2   28.30    8.10
   0 -13  -2  249.18   26.60
   0  13   2  304.07   29.80
   0 -13   2  245.88   26.10
  -1 -13  -2  159.88   22.80
   1  13  -2  182.48   24.30
   1 -13   2  141.49   21.60
  -1  13   2  182.48   24.50
  -1  13  -2  207.18   25.90
   1 -13  -2  152.38   21.90
  -1 -13   2  153.48   22.10
  -2 -13  -2   48.20    4.60
  -2 -13   2   64.99    6.10
  -4 -13  -2  195.48   12.10
  -4 -13   2  264.07   14.30
  -5 -13  -2   83.79    8.10
  -5 -13   2   92.79    9.30
  -6 -13   2   34.70    7.60
   7  13   2   -8.40   12.00
   0  14   2    7.80   12.40
   0  14  -2   -4.40   10.20
   1  14  -2  169.48   24.90
  -1  14   2  144.19   23.20
   1  14   2  175.48   24.90
  -1  14  -2  158.78   25.80
  -2 -14  -2  130.39    8.20
  -2 -14   2  135.79    9.30
  -3 -14  -2   15.40    3.60
  -3 -14   2   14.50    4.50
  -4 -14  -2  397.66   19.90
  -4 -14   2  414.66   21.30
  -5 -14   2   62.59    8.10
  -6 -14   2   55.39    8.80
   0  15   2  526.35   43.60
   0  15  -2  540.05   42.70
  -1 -15   2   84.49    7.70
  -2 -15  -2   32.10    4.40
  -2 -15   2   34.00    5.30
  -3 -15  -2  214.08   12.10
  -3 -15   2  225.68   13.40
  -4 -15   2   21.20    5.50
  -5 -15   2  203.38   14.40
   6  15  -2   44.30   19.10
   6  15   2   42.60   19.20
   0  16  -2  631.44   49.20
   0  16   2  602.14   48.80
  -1 -16   2  191.18   12.00
  -2 -16  -2  112.09    8.10
  -2 -16   2  123.49    9.40
  -3 -16  -2   33.60    4.70
  -3 -16   2   28.10    5.60
  -4 -16   2   17.00    5.40
  -5  16   2   76.89   20.80
   5  16  -2   87.69   24.40
   5  16   2   69.49   22.10
   6  16  -2  136.79   29.10
   6  16   2  101.59   25.00
   0  17   2   49.50   19.60
   0  17  -2   37.10   17.60
  -1 -17   2   34.10    5.70
  -2 -17  -2   95.29    7.80
  -2 -17   2  101.39    9.10
  -3 -17   2    5.70    4.50
  -4 -17   2   41.20    7.00
   5  17  -2   21.90   17.90
  -5  17   2   21.40   15.50
   5  17   2   20.40   29.20
   0  18   2  467.65   46.00
   0  18  -2  430.16   44.70
  -1 -18  -2   57.39    6.40
  -1 -18   2   65.99    7.50
  -2 -18   2   37.50    6.20
  -3 -18   2   66.39    8.00
  -4  18   2   46.80   19.60
   0  19   2  224.28   54.49
  -1 -19  -2   48.30    7.60
  -1 -19   2   43.90    6.60
  -2 -19   2    8.20    4.90
  -3  19   2   25.10   18.50
  -1 -20   2    7.10    5.30
   0   0   3   -2.00    1.10
   0   0  -3   -3.10    1.00
   1   0  -3 3846.22  156.98
  -1   0   3 3593.54  156.98
   2   0   3 1245.08   55.69
   2   0  -3 1329.87   55.99
   3   0  -3 2740.03  114.29
  -3   0   3 2483.45  114.19
   3   0   3 2760.42  114.09
  -4   0   3   81.99    8.60
  -5   0   3   40.40    7.80
  -6   0   3  108.49   11.80
  -7   0   3  171.68   16.10
  -8   0   3   56.89   11.40
  -9   0   3   60.89   13.40
   0  -1   3 2335.67   97.69
   0   1   3 2287.27   97.99
   0  -1  -3 2325.87   97.89
  -1   1   3  727.13   33.40
   1   1  -3  767.82   33.20
   1  -1  -3  795.82   33.40
   2   1  -3  575.44   26.00
   2  -1  -3  575.64   26.40
  -2  -1   3  570.04   26.20
   2   1   3  576.04   25.70
   3  -1   3  703.13   32.50
   3   1  -3  751.52   32.40
   3   1   3  715.03   31.80
   3  -1  -3  744.23   32.60
  -3  -1   3  607.64   32.10
  -4   1   3  125.39   10.90
   4   1   3  128.49    9.10
  -4  -1   3  126.59    9.90
  -5   1   3   12.20    6.50
  -5  -1   3   19.80    6.20
  -6   1   3  235.58   18.20
  -6  -1   3  248.98   17.80
  -7   1   3  143.39   15.60
  -7  -1   3  129.29   14.10
  -8   1   3   13.40    9.00
  -8  -1   3    1.60    8.90
  -9   1   3   37.90   12.60
  -9  -1   3   22.50   11.80
   0  -2  -3 2057.29   88.39
   0   2   3 2133.09   88.49
  -1   2   3 1944.51   83.69
   1   2  -3 1962.10   83.19
  -1  -2   3 1968.00   83.29
   1  -2  -3 1971.70   83.59
   2   2  -3 5712.53  240.98
  -2   2   3 5583.84  241.58
  -2  -2   3 5628.74  241.08
   2  -2  -3 5735.73  241.48
   2   2   3 5894.11  241.98
  -3  -2  -3  259.87   13.70
   3  -2   3  268.87   14.70
   3   2  -3  257.57   13.60
   3  -2  -3  269.27   15.50
   3   2   3  252.37   13.20
  -4   2   3  493.45   25.90
  -4  -2   3  493.25   24.90
   4   2   3  526.15   24.20
  -5   2   3   24.40    6.80
  -5  -2  -3   40.40    6.70
  -5  -2   3   33.10    6.60
  -6   2   3  165.38   15.50
  -6  -2   3  169.88   14.70
  -7   2   3  362.76   25.10
  -7  -2   3  374.96   24.00
  -8   2   3   64.29   12.90
  -8  -2   3   45.40   11.60
  -9   2   3  117.89   16.50
  -9  -2   3   98.69   15.40
   0   3   3   51.09    4.10
   0  -3  -3   58.09    3.90
  -1   3   3 3360.86  143.49
   1   3  -3 3439.26  142.89
   1  -3  -3 3389.26  143.39
  -1  -3   3 3347.67  142.99
   2   3  -3 2178.38   91.39
  -2  -3  -3 2152.08   90.79
  -2   3   3 2150.58   92.49
   2   3   3 2105.89   90.59
   2  -3  -3 2146.69   92.29
  -2  -3   3 2126.09   91.59
  -3   3   3 1308.67   57.39
   3   3  -3 1299.17   56.09
  -3  -3  -3 1360.26   55.89
   3   3   3 1300.47   55.49
  -3  -3   3 1147.19   56.09
  -4   3   3   63.19    7.80
   4   3   3   63.19    5.90
  -4  -3   3   53.79    6.50
  -5   3   3   22.40    7.10
  -5  -3  -3   33.70    6.10
  -5  -3   3   32.10    6.70
  -6  -3  -3    4.50    5.80
  -6   3   3   10.70    7.10
  -6  -3   3   10.70    6.20
  -7   3   3   63.09   11.90
  -7  -3   3   93.99   12.20
  -8   3   3   24.60   11.00
  -8  -3   3   11.40    9.30
  -9  -3   3  142.39   18.00
   0  -4  -3  117.89    6.60
  -1   4   3  106.29    7.80
  -1  -4   3  106.39    6.40
   1  -4  -3  102.69    7.30
   2   4  -3  953.90   39.90
  -2  -4  -3  880.21   39.10
  -2   4   3  903.41   41.20
   2   4   3  890.61   38.90
   2  -4  -3  955.00   41.20
  -2  -4   3  902.91   40.10
  -3  -4  -3 2567.14  107.29
  -3   4   3 2533.95  109.39
   3   4  -3 2550.74  107.69
   3   4   3 2501.45  106.89
  -3  -4   3 2435.46  107.89
  -4  -4  -3  226.48   12.70
  -5  -4  -3   50.79    7.00
  -5  -4   3   52.39    7.60
  -6   4   3   86.99   12.50
  -6  -4  -3   86.39    9.60
  -6  -4   3   94.99   11.00
  -7  -4  -3  408.16   24.20
  -7   4   3  432.36   27.10
  -7  -4   3  428.26   25.50
  -8   4   3   61.79   13.30
  -8  -4   3   38.00   10.30
  -9  -4   3   42.50   11.70
   0  -5  -3  348.07   16.20
  -1   5   3  585.44   26.90
  -1  -5   3  583.04   25.90
   1  -5  -3  581.24   26.80
   2   5  -3  639.64   27.50
  -2  -5  -3  606.14   26.70
  -2   5   3  600.34   29.40
  -2  -5   3  617.84   27.80
   2   5   3  609.64   26.40
   2  -5  -3  638.94   29.20
  -3   5   3 1561.24   67.89
  -3  -5  -3 1527.55   65.29
   3   5  -3 1567.14   65.79
  -3  -5   3 1436.46   66.09
   3   5   3 1509.55   64.89
  -4  -5  -3  579.54   26.90
  -4   5   3  564.34   29.70
   4   5   3  587.34   26.40
  -4  -5   3  577.34   27.80
  -5  -5  -3  172.78   11.80
  -5  -5   3  161.88   12.30
  -6   5   3   85.19   12.20
  -6  -5  -3   84.69    9.40
  -6  -5   3   88.69   10.40
  -7  -5  -3   51.69    9.00
  -7   5   3   77.69   13.30
  -7  -5   3   67.59   10.30
  -8  -5   3   84.69   13.20
  -9  -5   3   12.00   10.10
   0  -6  -3   51.49    4.70
  -1  -6   3  277.87   13.40
   1  -6  -3  286.47   14.80
   2   6  -3 1539.15   64.09
  -2  -6  -3 1471.75   63.19
   2  -6  -3 1461.05   65.69
   3   6  -3  270.07   13.50
  -3  -6  -3  262.87   12.90
  -3   6   3  279.67   16.80
   3   6   3  259.07   12.30
  -3  -6   3  269.87   14.20
  -4   6   3  473.55   26.10
  -4  -6  -3  514.95   23.10
   4   6   3  480.75   22.20
  -4  -6   3  476.25   24.10
  -5   6   3    0.50    3.60
  -5  -6  -3   22.70    5.10
  -5  -6   3   15.40    5.50
  -6   6   3  298.17   21.00
  -6  -6  -3  317.77   18.60
  -6  -6   3  338.47   19.80
  -7  -6  -3   24.70    7.10
  -7  -6   3   13.00    7.40
  -8  -6   3  164.08   16.40
   0  -7  -3  280.67   14.10
  -3  -7  -3   64.99    5.00
  -3  -7   3   68.39    6.30
   3   7   3   58.09    3.90
  -4  -7  -3   92.69    6.90
   4   7   3   83.79    5.70
  -4  -7   3   93.69    8.60
  -5  -7  -3   95.19    8.50
   5   7   3   90.39    6.80
  -5  -7   3   92.59    9.70
  -6  -7  -3  114.89   10.60
  -6  -7   3  108.99   11.20
  -7  -7  -3   76.49    9.60
  -7  -7   3   72.69   11.10
  -8  -7   3  181.58   17.60
   0  -8  -3  984.10   43.60
  -1  -8   3  258.97   12.80
   1  -8  -3  255.77   14.40
  -2  -8  -3   60.39    3.90
  -2  -8   3   50.19    4.90
  -3  -8  -3  793.22   34.60
  -3  -8   3  787.72   35.80
  -4  -8  -3  304.97   15.70
  -4  -8   3  325.67   17.30
   4   8   3  324.17   14.80
  -5  -8  -3   47.50    5.90
   5   8   3   44.30    4.60
  -5  -8   3   38.70    6.70
  -6  -8  -3  529.25   26.10
  -6  -8   3  498.95   27.40
  -7  -8  -3  150.78   13.10
  -7  -8   3  176.78   15.70
  -8  -8   3   35.00    9.90
   0   9  -3   -0.10    1.50
   0  -9  -3    3.60    7.90
   0   9   3   15.10    9.40
   0  -9   3   13.50    9.10
   1  -9  -3  623.24   30.10
  -1  -9   3  646.44   28.60
  -2  -9  -3  189.18    9.30
  -2  -9   3  199.38   10.70
  -3  -9  -3  996.30   43.40
  -3  -9   3 1008.00   44.80
  -4  -9  -3  123.99    8.20
  -4  -9   3  135.59    9.80
  -5  -9  -3   73.09    6.90
  -5  -9   3   66.19    8.00
   5   9   3   60.69    5.40
  -6  -9  -3   15.60    5.30
  -6  -9   3   21.40    6.90
  -7  -9  -3   45.70    7.30
  -7  -9   3   43.00    9.50
  -8  -9   3  181.98   17.50
   0  10   3   59.89   14.60
   0 -10  -3   53.49   13.40
   0 -10   3   43.40   11.50
   1 -10   3   99.69   15.50
   1  10  -3  108.89   18.50
  -1  10   3  123.49   18.50
   1  10   3  102.79   16.40
   1 -10  -3  103.29   17.00
  -1  10  -3  111.79   18.30
  -1 -10   3   93.29   16.10
  -2 -10  -3  258.17   12.20
  -2 -10   3  262.27   13.60
  -3 -10  -3  239.08   11.70
  -3 -10   3  226.18   13.00
  -4 -10  -3  237.38   12.20
  -4 -10   3  222.28   13.70
  -5 -10  -3   20.20    4.30
  -5 -10   3   27.90    6.30
   5  10   3   29.00    3.60
  -6 -10  -3  133.29   10.70
  -6 -10   3  142.79   13.10
  -7 -10   3  106.59   12.30
  -8 -10   3   45.50   10.40
   0  11  -3    4.60    5.40
   0 -11   3    9.80    9.00
   0 -11  -3   21.60   10.70
   0  11   3   12.40    9.80
   1 -11   3   61.59   14.30
  -1  11   3   61.89   15.40
   1  11  -3   58.89   16.30
  -1  11  -3   51.89   13.80
   1 -11  -3   57.29   14.10
  -1 -11   3   54.89   13.60
   1  11   3   74.09   16.10
  -2 -11  -3  171.78    9.00
  -2 -11   3  184.28   10.50
  -3 -11  -3    4.00    2.60
  -3 -11   3    5.40    3.60
  -4 -11  -3  450.45   21.00
  -4 -11   3  439.76   22.60
  -6 -11  -3  132.29   10.40
  -6 -11   3  147.39   13.10
  -7 -11   3   23.20    8.10
   0  12   3 1438.36   74.99
   0 -12   3 1320.57   72.19
   0 -12  -3 1273.97   72.29
  -1  12   3   18.80   12.10
   1  12  -3   11.20   11.40
   1 -12   3    5.70    8.80
  -1  12  -3    6.20   10.70
   1 -12  -3    5.50    9.40
   1  12   3    0.30    5.90
  -1 -12   3   18.30   11.10
  -2 -12  -3  116.69    6.90
  -2 -12   3  122.49    8.60
  -3 -12  -3   52.79    4.90
  -3 -12   3   31.60    5.20
  -4 -12  -3  813.92   36.00
  -4 -12   3  800.62   37.70
  -5 -12   3   14.40    5.60
  -6 -12   3  272.37   18.00
  -7 -12   3   27.30    8.20
   0  13   3   12.30   11.70
   0 -13  -3    8.80   10.90
   0 -13   3    5.00   10.20
   0  13  -3    2.90    6.00
   1 -13   3   21.50   11.60
  -1  13   3   36.40   14.90
   1  13  -3   27.60   15.10
   1 -13  -3   27.40   13.30
  -1  13  -3   29.10   13.50
  -1 -13   3   24.00   12.20
  -2 -13  -3  302.17   14.40
  -3 -13  -3  247.08   12.70
  -3 -13   3  253.57   14.40
  -4 -13  -3  130.99    8.50
  -4 -13   3  138.89   10.80
  -5 -13   3   99.69   10.20
  -6 -13   3    3.70    5.90
  -7 -13   3   38.50    9.00
   0  14   3    2.10   11.20
   0  14  -3   -4.00   10.20
  -1 -14   3   42.30    5.50
  -2 -14   3  478.75   23.30
  -3 -14  -3   29.50    3.90
  -3 -14   3   63.59    6.60
  -4 -14  -3   85.69    7.80
  -4 -14   3  106.39    9.80
  -5 -14   3   20.90    6.30
  -6 -14   3   61.79    9.20
   0  15   3   43.20   16.90
   0  15  -3   41.20   15.60
  -1 -15   3  366.26   18.80
  -2 -15  -3    3.50    2.70
  -2 -15   3   -3.70    3.60
  -3 -15   3   60.69    7.10
  -4 -15   3   20.70    5.80
  -5 -15   3   58.49    8.20
   6  15  -3   13.30   15.70
   6  15   3   18.40   16.50
   0  16   3  451.05   41.90
   0  16  -3  448.76   41.60
  -1 -16   3   17.60    4.80
  -2 -16  -3  129.39    8.50
  -2 -16   3  137.69   10.30
  -3 -16   3  324.77   18.10
  -4 -16   3  146.99   11.80
  -5 -16   3    4.00    5.70
   0  17  -3   30.80   17.80
   0  17   3   36.70   18.60
  -1 -17   3   13.70    5.00
  -2 -17  -3  117.99    9.10
  -2 -17   3  135.19   10.30
  -3 -17   3   10.90    5.20
  -4 -17   3  193.98   14.00
   5  17  -3   13.50   17.80
  -5  17   3   11.00   14.40
   0  18  -3   26.40   18.60
   0  18   3   42.50   19.20
  -1 -18  -3   68.79    6.60
  -1 -18   3   60.19    7.50
  -2 -18   3  170.18   12.10
  -3 -18   3  109.69   10.30
  -4  18   3   45.80   19.50
  -1 -19   3   74.19    8.30
  -2 -19   3   10.20    5.20
  -3 -19   3   13.40    6.10
  -1 -20   3   68.99    8.50
  -2 -20   3    4.90    5.20
   0   0   4 5488.35  238.58
   0   0  -4 5817.92  239.08
   1   0  -4 3687.83  154.28
  -1   0   4 3613.74  154.28
  -3   0   4   79.99    7.30
   3   0   4   74.19    7.10
   3   0  -4   85.59    7.50
  -4   0   4   11.80    4.90
  -5   0   4  612.24   31.20
  -6   0   4  116.89   12.90
  -7   0   4    5.50    8.20
  -8   0   4  120.09   15.30
  -9   0   4  207.08   21.10
   0  -1   4  160.58    7.80
   0   1   4  156.68    7.60
   0  -1  -4  163.68    7.60
  -1   1   4 1969.40   86.59
   1   1  -4 2083.69   86.39
   1  -1  -4 2044.60   86.59
   2   1  -4 1352.66   56.09
  -2   1   4 1169.68   56.19
   2   1   4 1325.27   55.69
   2  -1  -4 1313.57   56.29
   3   1  -4  317.67   16.10
   3  -1   4  303.87   16.20
  -3  -1   4  311.47   16.50
   3   1   4  302.57   15.50
  -4   1   4  680.13   34.30
   4   1   4  751.12   33.40
  -4  -1   4  726.23   34.20
  -5   1   4  343.47   20.10
  -5  -1   4  335.37   19.90
  -6   1   4  470.75   26.80
  -6  -1   4  472.95   26.70
  -7   1   4  115.29   13.90
  -7  -1   4  145.69   15.40
  -8   1   4   30.90   11.00
  -8  -1   4   31.60   10.10
  -9   1   4  134.09   18.90
  -9  -1   4  148.09   18.40
   0   2   4  213.28   10.00
   0  -2  -4  213.68    9.80
  -1   2   4 8049.79  327.97
   1   2  -4 8205.68  329.77
   1  -2  -4 8271.37  330.17
  -1  -2   4 6626.54  329.47
  -2   2   4 1907.61   82.49
   2   2  -4 1934.71   81.69
   2   2   4 1898.91   81.09
   2  -2  -4 1925.31   82.19
  -2  -2   4 1863.51   81.89
   3   2  -4 1225.38   52.49
   3  -2   4 1153.88   52.99
   3   2   4 1204.98   51.89
  -3  -2   4 1177.68   52.79
  -4   2   4  133.99   11.00
   4   2   4  157.08    9.70
  -4  -2   4  154.98   11.20
  -5   2   4  207.88   14.80
  -5  -2   4  194.78   13.80
  -6   2   4    7.20    7.30
  -6  -2   4    8.20    6.30
  -7   2   4  354.36   25.20
  -7  -2   4  382.76   24.20
  -8   2   4  113.39   15.60
  -8  -2   4  113.69   14.90
  -9   2   4  271.97   25.30
  -9  -2   4  305.67   24.60
   0   3   4  243.38   11.20
   0  -3  -4  234.48   11.00
  -1   3   4 4622.14  194.58
   1   3  -4 4586.04  194.08
   1  -3  -4 4560.14  194.48
  -1  -3   4 4636.34  194.18
  -2   3   4  556.34   26.30
   2   3  -4  566.04   25.30
   2   3   4  555.14   24.30
   2  -3  -4  573.34   26.10
  -2  -3   4  543.25   25.40
  -3   3   4  266.87   15.60
   3   3  -4  276.57   14.10
   3   3   4  271.17   13.30
  -3  -3   4  265.97   14.60
  -4  -3   4  565.14   28.20
   4   3   4  593.44   27.00
  -5   3   4  259.57   17.20
  -6   3   4  100.99   13.20
  -6  -3   4  125.09   12.80
  -7   3   4  181.78   18.10
  -7  -3   4  168.88   16.40
  -8   3   4   24.60   11.60
  -8  -3   4   22.90   10.10
  -9   3   4    3.40   10.20
  -9  -3   4   29.10   11.60
   0  -4  -4 3923.71  163.08
   0   4   4 3814.12  163.18
  -1   4   4  375.46   17.80
  -1  -4   4  365.96   17.00
   1  -4  -4  361.16   17.50
  -2   4   4 2158.78   92.79
   2   4  -4 2110.59   91.59
   2   4   4 2110.99   90.39
   2  -4  -4 2208.38   92.69
  -3   4   4  132.19   11.00
  -3  -4   4  110.79    8.60
   3   4   4  128.19    7.10
  -4  -4  -4  390.56   19.20
  -4   4   4  392.46   21.60
  -4  -4   4  372.46   20.10
   4   4   4  387.66   18.50
  -5  -4  -4  972.70   43.90
  -5  -4   4  941.21   44.80
  -6   4   4  296.87   21.20
  -6  -4   4  305.67   19.50
  -7   4   4   76.59   12.10
  -7  -4   4   55.29   10.30
  -8   4   4  128.19   16.90
  -8  -4   4  109.79   14.10
  -9  -4   4   78.89   14.10
   0  -5  -4   12.90    2.60
  -1   5   4   69.49    6.50
  -1  -5   4   81.89    5.50
   1  -5  -4   77.69    6.30
   2   5  -4 2449.05  104.99
  -2   5   4 2462.25  106.49
   2  -5  -4 2488.95  106.29
  -3  -5  -4 1337.07   57.99
  -3   5   4 1369.86   60.69
   3   5   4 1364.26   57.59
  -3  -5   4 1327.87   59.19
  -4   5   4  183.88   14.70
  -4  -5  -4  204.58   11.20
  -4  -5   4  190.78   12.50
   4   5   4  193.78   10.40
  -5  -5  -4  311.87   17.20
  -5  -5   4  322.57   18.40
  -6   5   4  441.06   26.10
  -6  -5   4  439.26   24.70
  -7   5   4  195.88   20.10
  -7  -5   4  239.98   18.00
  -8   5   4  115.99   16.20
  -8  -5   4  129.39   15.40
  -9  -5   4  111.49   16.10
   0  -6  -4  465.45   21.20
  -1  -6  -4  528.15   22.80
   1  -6  -4  528.25   24.70
  -2   6   4  245.48   15.60
   2   6  -4  282.47   13.60
  -2  -6   4  286.97   13.90
   2  -6  -4  276.27   15.30
  -3  -6  -4  117.29    6.70
  -3   6   4   94.49    9.80
  -3  -6   4  118.89    8.50
   3   6   4  112.19    5.90
  -4  -6  -4  104.29    7.50
  -4   6   4  108.39   11.10
  -4  -6   4  108.09    9.30
   4   6   4  111.29    6.70
  -5  -6  -4   95.09    8.20
   5   6   4   81.59    6.80
  -5  -6   4   95.39    9.80
  -6  -6  -4  249.88   15.70
  -6   6   4  256.67   19.30
  -6  -6   4  266.07   17.60
  -7   6   4  104.49   14.70
  -7  -6   4  112.79   13.30
  -8  -6   4  199.68   19.00
   0  -7  -4  872.01   38.40
  -1  -7  -4  572.34   26.00
   1  -7  -4  598.44   27.70
  -1  -7   4  617.14   26.80
  -2  -7  -4  907.31   39.30
  -2  -7   4  948.51   41.00
  -3  -7  -4  235.48   11.20
  -3   7   4  235.08   15.70
   3   7   4  232.48   10.60
  -3  -7   4  236.68   13.10
  -4  -7  -4   58.99    5.30
  -4   7   4   51.19    8.60
   4   7   4   46.40    4.20
  -4  -7   4   58.79    6.80
  -5   7   4  230.38   18.30
  -5  -7   4  237.98   15.30
   5   7   4  233.78   12.20
  -6  -7  -4   62.29    7.80
  -7  -7   4   33.90    8.80
  -8  -7   4    0.30    8.30
   0  -8  -4  477.25   22.40
  -1  -8   4  822.82   36.80
   1  -8  -4  842.72   38.00
  -2  -8  -4 1122.79   48.10
  -2  -8   4 1146.59   49.80
  -3  -8  -4  210.98   10.30
  -3  -8   4  215.78   12.40
  -4  -8  -4   48.50    4.80
  -4  -8   4   54.39    6.60
   4   8   4   48.50    3.90
   5   8   4 1120.99   49.00
  -5  -8   4 1133.39   51.79
  -6  -8  -4  190.98   13.00
  -6  -8   4  223.28   15.60
  -7  -8   4    3.70    7.00
  -8  -8   4  174.58   16.90
   0  -9  -4   99.09    7.60
  -1  -9   4  740.03   32.50
   1  -9  -4  703.73   33.60
  -2  -9  -4  270.97   12.30
  -2  -9   4  274.17   14.10
  -3  -9  -4  138.09    7.50
  -3  -9   4  157.48    9.80
  -4  -9  -4   57.99    5.50
  -4  -9   4   71.29    7.70
  -5  -9   4  425.26   22.10
   5   9   4  389.16   18.50
  -6  -9  -4  112.59    9.40
  -6  -9   4   89.69   10.50
  -7  -9   4   94.39   12.00
  -8  -9   4  131.99   14.80
   0 -10  -4 1086.99   48.30
  -1 -10   4   85.19    6.60
  -2 -10  -4  153.88    7.30
  -2 -10   4  127.89    9.20
  -3 -10  -4   23.60    2.90
  -3 -10   4   31.50    5.00
  -4 -10  -4   -0.80    2.60
  -4 -10   4    1.70    4.20
  -5 -10  -4  174.88   10.60
  -5 -10   4  198.98   13.80
  -6 -10  -4  359.86   18.50
  -6 -10   4  346.97   21.30
  -7 -10   4   54.99   10.10
  -8 -10   4   62.19   11.60
   0 -11  -4  390.26   19.60
  -1 -11   4  224.38   12.30
  -2 -11  -4  202.98    9.90
  -2 -11   4  207.68   11.90
  -3 -11  -4  238.68   11.60
  -3 -11   4  241.58   13.80
  -4 -11  -4   34.80    4.00
  -4 -11   4   37.50    6.10
  -5 -11  -4  168.88    9.90
  -5 -11   4  164.68   12.90
  -6 -11   4   48.00    8.20
  -7 -11   4    0.50    6.80
   0 -12  -4  493.65   24.30
  -1 -12   4  287.67   15.10
  -2 -12  -4   10.00    2.30
  -2 -12   4    8.80    3.80
  -3 -12  -4   35.00    3.70
  -3 -12   4   33.50    5.40
  -4 -12  -4   83.69    6.30
  -4 -12   4   95.59    9.20
  -5 -12   4  392.06   21.90
  -6 -12   4   62.09    9.40
  -7 -12   4    3.90    6.90
   0 -13   4  118.79   20.40
   0  13   4  162.28   24.30
  -1 -13  -4   33.90    4.80
  -1 -13   4   23.80    4.60
  -2 -13  -4  514.35   22.80
  -2 -13   4  502.85   24.60
  -3 -13  -4  258.17   12.50
  -3 -13   4  241.88   14.60
  -4 -13  -4  538.85   24.50
  -4 -13   4  538.95   27.10
  -5 -13   4  188.68   14.10
  -6 -13   4  141.39   13.50
  -7 -13   4   52.19    9.70
   0  14   4  202.68   27.70
   0  14  -4  187.68   25.70
  -1 -14  -4   11.70    4.00
  -1 -14   4   12.80    4.20
  -2 -14  -4  676.73   29.90
  -2 -14   4  673.03   31.70
  -3 -14  -4  106.29    7.10
  -3 -14   4  126.49    9.90
  -4 -14   4  336.87   19.00
  -5 -14   4  102.89   10.60
  -6 -14   4  139.59   13.40
   0  15  -4    3.00   11.20
   0  15   4    1.80   13.00
  -1 -15   4  282.77   15.70
  -3 -15   4  166.28   11.90
  -4 -15   4   96.19    9.60
  -5 -15   4   -7.00    5.00
  -6 -15   4   71.49   10.20
   0  16  -4   21.20   15.60
   0  16   4   11.00   14.80
  -1 -16   4   43.00    6.30
  -2 -16  -4  146.59    8.70
  -2 -16   4  155.98   11.20
  -3 -16   4   65.89    7.70
  -4 -16   4  213.58   14.70
  -5 -16   4   20.30    6.70
   0  17   4   28.10   16.50
   0  17  -4   30.00   16.80
  -1 -17   4  143.79   11.10
  -2 -17   4   23.10    5.70
  -3 -17   4   40.50    6.70
  -4 -17   4   10.70    6.00
  -5  17   4   26.40   16.20
   5  17  -4   18.10   18.00
   0  18   4  110.49   26.00
   0  18  -4  123.29   28.80
  -1 -18   4  326.57   18.50
  -2 -18   4   87.49    9.20
  -3 -18   4    6.40    5.30
  -4 -18   4  131.59   12.30
  -1 -19   4   17.10    5.80
  -2 -19   4   15.00    5.70
  -3 -19   4   33.90    7.10
  -1 -20   4    5.00    5.50
  -2 -20   4  101.19   10.10
   0   0   5    8.90    2.10
   0   0  -5    7.00    1.80
   1   0  -5 5426.66  228.28
  -1   0   5 5404.86  229.88
  -2   0   5    0.90    1.80
   2   0  -5    5.50    3.10
  -3   0   5  184.48   11.50
   3   0   5  188.18   10.90
  -4   0   5  123.39   10.30
  -5   0   5  419.66   23.20
  -6   0   5  107.29   11.80
  -7   0   5   55.29   11.10
  -8   0   5   77.99   13.10
  -9   0   5   23.40   11.60
   0  -1  -5 3843.02  163.58
   0  -1   5 3989.40  164.78
   0   1   5 3825.52  163.68
  -1   1   5  432.76   20.20
   1   1  -5  441.36   19.80
   1  -1  -5  449.76   20.00
  -1  -1   5  413.56   19.90
   2   1  -5 1575.54   67.49
  -2   1   5 1502.65   67.79
   2  -1  -5 1605.44   67.79
   3  -1   5  939.41   44.20
   3   1   5 1001.50   43.80
  -3  -1   5 1022.80   44.70
  -4   1   5   52.49    7.20
  -4  -1   5   55.39    7.30
   4   1   5   79.89    7.00
  -5   1   5   41.30    7.50
  -5  -1   5   49.60    8.20
  -6   1   5  184.18   16.00
  -6  -1   5  169.08   15.20
  -7   1   5  273.17   21.20
  -7  -1   5  324.57   22.10
  -8   1   5   84.69   13.70
  -8  -1   5   70.39   12.60
  -9   1   5   37.20   12.40
  -9  -1   5   46.70   13.10
   0  -2  -5 5347.96  220.08
   0  -2   5 5200.38  222.08
   0   2   5 5084.89  220.48
   1   2  -5 1210.48   50.49
  -1   2   5 1150.98   50.89
   1  -2  -5 1154.98   50.79
   2   2  -5 1238.78   52.99
  -2   2   5 1224.68   53.69
   2  -2  -5 1189.58   53.39
  -3   2   5  162.08   11.10
  -3  -2   5  165.58   10.70
   3   2   5  150.98    9.10
  -4  -2   5   43.70    6.30
   4   2   5   41.30    5.20
  -5   2   5   45.30    8.40
  -5  -2   5   53.09    8.10
  -6   2   5   78.29   11.70
  -6  -2   5   87.49   11.20
  -7   2   5  336.87   23.90
  -7  -2   5  331.17   22.60
  -8   2   5  199.28   20.50
  -8  -2   5  249.18   20.70
  -9   2   5   25.80   12.50
  -9  -2   5   10.80   10.10
   0   3   5 2456.25  102.99
   0  -3  -5 2410.86  102.89
   1   3  -5  242.98   11.30
  -1   3   5  231.38   12.20
   1   3   5  227.68   10.10
   1  -3  -5  218.68   11.70
   2   3  -5 1821.22   77.79
  -2   3   5 1844.22   78.79
   2   3   5 1773.42   76.89
   2  -3  -5 1817.62   78.59
  -3   3   5 1196.08   52.79
   3   3   5 1172.88   50.49
  -3  -3   5 1129.09   51.69
  -4   3   5  338.07   20.70
   4   3   5  438.16   19.70
  -4  -3   5  421.86   21.20
  -6   3   5   47.90    9.80
  -6  -3   5   78.59    9.90
  -7   3   5   43.90   11.30
  -7  -3   5   32.30    8.80
  -8   3   5    5.60    9.60
  -8  -3   5   21.30   10.30
  -9   3   5   42.50   13.40
  -9  -3   5   24.50   12.50
   0  -4  -5  125.69    6.80
   0   4   5  128.09    7.10
  -1   4   5 2279.67   96.09
  -1  -4   5 2132.69   95.59
   1  -4  -5 2324.17   95.99
  -2   4   5  721.63   33.50
   2   4  -5  762.62   32.40
   2  -4  -5  746.13   33.30
   2   4   5  681.73   30.90
  -3   4   5  537.95   26.00
   3   4   5  480.45   22.60
  -3  -4   5  519.45   24.50
  -4   4   5  869.31   41.60
  -4  -4   5  868.31   40.30
   4   4   5  866.11   38.50
  -5  -4   5   24.70    6.70
  -6   4   5  401.46   24.30
  -6  -4   5  390.86   23.20
  -7   4   5  233.48   19.80
  -7  -4   5  233.68   18.60
  -8   4   5   72.89   14.00
  -8  -4   5  105.89   14.10
  -9   4   5    9.20   10.90
  -9  -4   5   -4.10    9.40
   0  -5  -5  377.76   16.70
   0   5   5  350.86   16.90
  -1   5   5   50.59    5.50
   1  -5  -5   49.80    5.20
  -2   5   5 1193.38   52.99
   2   5  -5 1221.68   51.59
   2  -5  -5 1157.78   52.59
  -2  -5   5 1165.98   51.79
  -3   5   5 1147.29   51.59
  -3  -5   5 1092.09   49.99
   3   5   5 1137.09   48.20
  -4   5   5   51.49    8.60
  -4  -5   5   50.49    6.90
   4   5   5   53.69    4.80
   5   5   5  131.69    8.80
  -5  -5   5  132.49   11.70
  -6   5   5   40.60    8.90
  -6  -5   5   47.60    9.10
  -7   5   5  420.86   27.60
  -7  -5   5  408.46   25.30
  -8   5   5   79.29   14.10
  -8  -5   5   64.89   12.10
   0  -6  -5  778.02   34.10
  -1  -6  -5 3183.28  131.89
  -1   6   5 3069.69  133.99
   1  -6  -5 3150.38  133.89
  -1  -6   5 3152.48  133.39
  -2   6   5  144.59   10.90
   2  -6  -5  146.09   10.00
  -2  -6   5  137.59    8.80
  -3   6   5  438.36   23.50
  -3  -6   5  427.66   21.50
   3   6   5  448.66   19.10
  -4   6   5  112.49   11.50
   4   6   5  119.89    7.00
  -4  -6   5  131.69   10.20
  -5   6   5   68.79   10.90
  -5  -6   5   81.49    9.00
   5   6   5   78.69    6.50
  -6   6   5   32.60    9.50
  -6  -6   5   38.80    8.40
  -7   6   5   59.89   12.00
  -7  -6   5   67.09   10.90
  -8   6   5   80.49   14.80
  -8  -6   5  129.69   15.20
   0  -7  -5 4283.47  181.08
  -1  -7  -5   36.10    2.90
   1  -7  -5   33.50    4.90
  -1  -7   5   27.80    3.90
  -2   7   5 1056.29   47.80
  -2  -7   5 1040.20   46.30
  -3   7   5  290.47   17.00
  -3  -7   5  267.27   14.90
  -4   7   5  430.06   25.20
   4   7   5  454.85   20.50
  -4  -7   5  497.05   23.60
  -5   7   5   26.10    8.70
  -5  -7   5   44.60    7.20
   5   7   5   43.30    4.50
  -6   7   5  214.08   18.90
  -6  -7   5  209.08   15.90
  -7   7   5   79.09   13.00
  -7  -7   5   83.49   11.50
  -8  -7   5  154.38   16.80
   0  -8  -5    2.40    2.80
  -1  -8  -5  871.81   37.10
   1  -8  -5  854.91   39.00
  -1  -8   5  851.01   38.20
  -2  -8   5   71.29    6.50
  -3  -8   5   45.20    5.60
  -4   8   5  430.26   25.00
  -4  -8   5  430.76   22.00
   4   8   5  424.26   18.80
  -5   8   5  121.99   13.80
  -5  -8   5  143.99   12.00
   5   8   5  146.09    8.10
  -6  -8   5  261.97   17.80
  -7  -8   5  125.29   13.80
  -8  -8   5  165.98   16.90
   0  -9  -5  491.05   23.00
  -1  -9  -5  100.59    6.20
  -1  -9   5   98.89    7.10
   1  -9  -5  102.39    8.30
  -2  -9   5  123.79    8.50
  -3  -9   5  360.56   18.60
  -4  -9  -5   18.40    2.90
  -4  -9   5   18.70    5.00
   5   9   5   30.00    3.30
  -5  -9   5   30.80    6.70
  -6  -9   5   31.00    7.70
  -7  -9   5   56.99   10.30
  -8  -9   5   51.39   11.30
   0 -10  -5   87.39    7.20
  -1 -10  -5  426.06   20.30
   1 -10  -5  463.35   23.40
  -1 -10   5  440.86   21.10
  -2 -10  -5   49.70    3.30
  -2 -10  -5   59.89    3.90
  -2 -10   5   57.19    6.10
  -3 -10   5   70.99    7.10
  -4 -10  -5   59.39    4.50
  -4 -10   5   77.19    8.00
  -5 -10   5    5.30    5.30
  -6 -10   5  104.09   11.70
  -7 -10   5    4.30    7.30
  -8 -10   5   56.89   11.50
   0 -11  -5   10.60    3.80
  -1 -11  -5   57.59    5.40
  -1 -11   5   54.49    5.70
  -2 -11  -5  257.57   12.20
  -2 -11  -5  255.17   11.70
  -2 -11   5  258.77   14.10
  -3 -11   5  367.06   19.10
  -4 -11  -5  264.77   12.20
  -4 -11   5  274.27   16.00
  -5 -11   5  214.68   14.90
  -6 -11   5   45.30    8.40
  -7 -11   5   68.99   11.00
   0 -12  -5  115.29    8.90
  -1 -12  -5  719.53   33.10
  -1 -12   5  746.43   33.60
  -2 -12  -5   22.40    3.10
  -2 -12  -5   20.40    2.50
  -2 -12   5   21.80    4.70
  -3 -12   5  340.47   18.20
  -4 -12   5  183.88   13.00
   5 -12   5    7.70   10.30
  -5  12   5   16.60   11.80
   5  12  -5   14.00   13.50
  -5 -12   5    8.00   11.00
   5  12   5   15.40   15.10
  -6 -12   5   73.99   10.30
  -7 -12   5   -2.00    7.00
   0 -13   5  568.74   43.70
   0  13   5  641.64   45.20
  -1 -13  -5   58.79    5.90
  -1 -13   5   64.69    6.70
  -2 -13  -5   71.79    5.80
  -2 -13  -5   69.59    4.90
  -2 -13   5   89.69    7.90
  -3 -13  -5  123.29    6.60
  -3 -13   5  144.29   10.30
  -4 -13   5  105.99    9.90
  -5 -13   5   24.00    6.70
  -6 -13   5   60.69    9.90
  -7 -13   5  125.19   14.30
   0  14  -5    1.20   10.80
   0  14   5   -3.10   12.20
  -1 -14  -5  133.09    9.20
  -1 -14   5  135.89    9.90
  -2 -14  -5   88.99    6.00
  -2 -14   5  116.09    9.20
  -3 -14   5   -2.60    4.20
  -4 -14   5   33.80    6.80
  -5 -14   5   43.40    8.20
  -6 -14   5    2.20    6.30
   0  15  -5   15.90   14.10
   0  15   5    7.80   14.60
  -1 -15   5   68.69    7.30
  -2 -15  -5  503.25   22.90
  -2 -15   5  514.45   25.30
  -3 -15   5  143.49   11.10
  -4 -15   5   21.10    6.30
  -5 -15   5   71.19    9.60
  -6 -15   5   46.60    9.20
   0  16  -5  267.27   33.40
   0  16   5  278.17   34.20
  -1 -16   5  121.19   10.30
  -2 -16   5  395.96   20.90
  -3 -16   5  170.78   12.40
  -4 -16   5  115.29   11.30
  -5 -16   5  117.69   12.00
   0  17   5  498.75   45.60
   0  17  -5  465.65   45.30
  -1 -17   5    5.30    4.80
  -2 -17   5  167.98   12.30
  -3 -17   5  102.39   10.10
  -4 -17   5   48.20    8.20
  -5 -17   5    4.40    5.80
   0  18  -5   18.30   18.10
   0  18   5   40.40   20.70
  -1 -18   5   24.20    6.20
  -2 -18   5   62.29    8.20
  -3 -18   5  227.18   15.40
  -4 -18   5   -0.60    5.40
  -1 -19   5   79.29    9.20
  -2 -19   5  120.69   11.50
  -3 -19   5   21.30    6.50
  -1 -20   5   80.79    9.30
  -2 -20   5   80.09    9.40
   0   0  -6 2178.08   91.69
   0   0   6 2150.38   91.79
   1   0  -6  453.85   20.50
  -1   0   6  438.46   20.70
   2   0  -6    0.20    3.00
  -2   0   6    2.70    3.40
  -3   0   6    3.30    1.90
  -4   0   6  838.02   39.60
  -5   0   6   25.20    7.00
  -6   0   6   20.90    7.80
  -7   0   6  151.28   16.50
  -8   0   6   33.20   10.90
  -9   0   6  142.09   19.00
   0  -1  -6  146.69    7.40
   0  -1   6  143.79    7.70
   0   1   6  142.39    7.60
  -1   1   6 1618.94   71.09
   1   1  -6 1693.83   70.89
   1  -1  -6 1672.43   70.99
  -1  -1   6 1637.44   71.09
  -2   1   6  108.69    8.50
   2   1  -6  100.19    7.40
   2  -1  -6  108.89    7.50
  -3   1   6  507.45   26.70
  -3  -1   6  577.84   26.90
   3   1   6  597.74   26.20
  -4   1   6  234.08   14.90
  -4  -1   6  227.38   15.10
   4   1   6  266.57   13.90
  -5   1   6   20.60    6.70
  -5  -1   6   19.40    6.50
  -6   1   6   75.89   11.30
  -6  -1   6   69.79   10.00
  -7   1   6   38.60   10.30
  -7  -1   6   56.69   11.30
  -8   1   6   23.10   10.50
  -8  -1   6   39.20   10.80
  -9   1   6   75.19   14.50
  -9  -1   6  108.89   16.40
   0  -2   6  271.67   12.60
   0  -2  -6  263.37   12.20
   0   2   6  257.17   12.40
   1   2  -6  109.39    6.50
  -1   2   6   99.29    7.30
   1  -2  -6   95.29    6.40
   1   2   6   98.39    5.10
  -2   2   6 1318.27   59.29
   2   2  -6 1377.76   58.79
   2  -2  -6 1361.86   59.19
  -3   2   6  534.85   27.00
  -3  -2   6  560.04   26.50
   3   2   6  558.64   25.40
  -4  -2   6   12.10    5.10
   4   2   6    6.90    3.40
  -6   2   6   60.19   10.60
  -6  -2   6   67.79   10.10
  -7   2   6  131.59   15.60
  -7  -2   6  153.98   15.40
  -8   2   6   -5.20    9.00
  -8  -2   6   17.10   10.30
  -9   2   6  108.79   17.40
  -9  -2   6  138.49   17.60
   0   3   6 1228.08   52.09
   0  -3  -6 1201.58   51.89
  -1   3   6 1468.65   62.79
   1   3  -6 1496.05   62.29
   1   3   6 1395.96   61.19
   1  -3  -6 1439.76   62.49
  -2   3   6  196.58   12.10
   2   3  -6  212.38   11.00
   2  -3  -6  221.58   11.80
  -2  -3   6  195.18   11.10
  -3   3   6  224.88   14.20
   3   3   6  231.08   11.80
  -3  -3   6  241.78   13.40
  -4   3   6  624.74   31.40
   4   3   6  651.53   28.90
  -4  -3   6  603.84   30.30
  -6   3   6  209.98   17.10
  -6  -3   6  230.58   16.30
  -7   3   6   60.89   12.30
  -7  -3   6   62.19   10.90
  -8   3   6   55.69   12.90
  -8  -3   6   89.99   14.10
  -9   3   6   75.29   16.00
  -9  -3   6   88.69   15.00
   0   4   6 1459.25   61.39
   0  -4  -6 1408.76   61.09
  -1   4   6   40.60    5.10
   1  -4  -6   55.49    5.30
   1   4   6   59.69    3.30
  -2   4   6  337.17   17.70
   2   4  -6  402.56   17.60
   2  -4  -6  335.97   17.30
  -2  -4   6  331.87   16.90
   2   4   6  317.67   14.90
  -3   4   6 1025.90   47.30
   3   4   6 1055.49   44.50
  -3  -4   6 1003.40   46.20
  -4   4   6  491.65   25.90
   4   4   6  482.85   22.30
  -4  -4   6  455.65   24.20
  -5  -4   6  329.57   19.20
   5   4   6  311.07   18.00
  -6   4   6   93.49   12.10
  -6  -4   6  122.09   12.30
  -7   4   6   17.30    9.10
  -7  -4   6    2.10    7.30
  -8   4   6   67.09   13.80
  -8  -4   6   38.40   10.90
   0   5   6  765.92   34.20
   0  -5  -6  791.72   34.00
  -1   5   6   51.59    5.60
   1  -5  -6   44.60    4.90
  -1  -5   6   51.69    4.90
  -2   5   6  612.54   29.10
  -2  -5   6  609.44   28.00
   2  -5  -6  597.34   28.50
  -3   5   6  955.10   44.80
  -3  -5   6  960.70   43.50
   3   5   6  965.90   41.20
  -4   5   6   -3.40    5.80
  -4  -5   6   -3.00    4.30
   4   5   6   -1.00    2.20
   5   5   6   94.89    7.40
  -5  -5   6  107.29   10.60
  -6   5   6  190.08   17.10
  -6  -5   6  226.68   16.50
  -7   5   6   73.59   12.90
  -7  -5   6   60.69   10.90
  -8   5   6   20.40   11.60
  -8  -5   6   18.40    9.80
   0  -6  -6  878.81   37.20
   0   6   6  824.72   37.40
  -1   6   6  524.85   24.60
   1  -6  -6  516.15   24.20
  -1  -6   6  513.45   23.80
  -2   6   6  145.09   10.90
  -2  -6   6  141.09    9.20
  -3   6   6  105.89   10.20
  -3  -6   6  108.99    8.60
   3   6   6  107.29    5.10
  -4   6   6    9.30    6.70
  -4  -6   6    0.80    4.40
   4   6   6    1.50    2.10
  -5   6   6  -10.80    6.80
  -5  -6   6   -3.20    5.00
   5   6   6    1.00    2.70
  -6   6   6   95.79   13.40
  -6  -6   6  113.49   12.20
  -7   6   6  222.28   19.90
  -7  -6   6  255.57   19.10
  -8   6   6   25.30   12.20
  -8  -6   6   51.79   11.30
   0  -7  -6   15.30    3.00
  -1   7   6  435.66   21.80
  -1  -7  -6  449.66   19.20
  -1  -7   6  460.55   21.00
   1  -7  -6  435.96   21.40
  -2   7   6  578.74   29.00
  -2  -7   6  606.84   27.60
  -3   7   6  249.97   16.50
  -3  -7   6  262.57   14.50
  -4   7   6  839.12   39.60
   4   7   6  775.92   34.00
  -4  -7   6  764.32   37.00
  -5   7   6  765.42   38.80
  -5  -7   6  731.03   36.00
   5   7   6  730.13   32.80
  -6   7   6   85.79   13.40
  -6  -7   6   78.49   10.60
  -7   7   6   66.29   12.70
  -7  -7   6   60.39   10.40
  -8  -7   6   17.20    9.80
   0  -8  -6 1636.34   70.39
  -1  -8  -6  200.88    9.10
   1  -8  -6  193.18   11.40
  -1  -8   6  180.58   10.80
  -2   8   6  799.82   37.90
  -2  -8   6  807.92   36.50
  -3   8   6   27.60    7.40
  -3  -8   6   40.80    5.30
  -4   8   6   17.70    7.00
   4   8   6   22.60    2.20
  -4  -8   6   35.00    6.10
  -5   8   6  103.19   13.00
  -5  -8   6  130.69   11.40
   5   8   6  114.89    6.80
  -6   8   6   99.39   13.60
  -6  -8   6   99.39   11.60
  -7  -8   6   13.90    8.00
  -8  -8   6   18.00    9.70
   0  -9  -6  734.63   33.00
  -1  -9  -6  216.38    9.90
  -1  -9   6  182.48   11.20
   1  -9  -6  202.88   11.90
  -2  -9   6   99.49    7.50
  -3  -9   6  497.05   24.50
  -4  -9   6   49.90    7.00
  -5  -9   6  235.78   15.90
   5   9   6  229.68   11.00
  -6  -9   6   70.49    9.90
  -7  -9   6   65.39   10.70
  -8  -9   6   49.30   11.20
   0 -10  -6  545.75   25.40
  -1 -10  -6  155.08    8.40
   1 -10  -6  156.78   11.40
  -1 -10   6  160.58    9.80
  -2 -10   6  304.37   16.10
  -3 -10   6   15.00    4.70
  -4 -10   6  122.19   10.80
  -5 -10   6   76.79    9.40
  -6 -10   6  107.79   12.10
  -7 -10   6   53.39   10.50
   0 -11  -6   11.10    3.60
  -1 -11  -6  236.08   11.80
  -1 -11   6  229.18   13.00
  -2 -11   6   88.79    7.90
  -3 -11   6  138.79   10.50
  -4 -11   6  458.85   23.90
  -5 -11   6   76.29    9.30
  -6 -11   6  162.38   14.70
  -7 -11   6   28.20    9.00
   0 -12  -6  597.14   28.10
  -1 -12  -6   71.69    6.20
  -1 -12   6  105.39    8.00
  -2 -12  -6   23.30    2.10
  -2 -12   6   21.60    4.70
  -3 -12   6  274.77   16.00
  -4 -12   6   36.90    6.70
  -5 -12   6   86.69   10.10
  -6 -12   6   93.09   11.30
  -7 -12   6   50.99   10.50
   0 -13  -6   59.19    6.40
  -1 -13  -6  389.06   19.20
  -1 -13   6  412.96   20.40
  -2 -13  -6  365.46   16.10
  -2 -13   6  357.76   19.10
  -3 -13   6   84.79    8.60
  -4 -13   6   95.09    9.90
  -5 -13   6   46.10    8.00
  -6 -13   6  219.48   17.00
  -7 -13   6   36.80    9.30
   0  14  -6  219.08   27.50
   0  14   6  180.68   26.10
  -1 -14   6  100.09    8.90
  -2 -14  -6  381.76   17.10
  -2 -14   6  383.66   20.10
  -3 -14   6   40.20    6.50
  -4 -14   6   59.99    8.30
  -5 -14   6  168.98   14.30
  -6 -14   6   52.19    9.70
   0  15  -6    6.30   13.30
   0  15   6   16.70   15.30
  -1 -15   6   91.69    8.60
  -2 -15   6   37.10    6.40
  -3 -15   6  106.79   10.20
  -4 -15   6   50.29    7.90
  -5 -15   6   54.89    9.10
  -6 -15   6   73.59   10.80
   0  16  -6   25.10   16.20
   0  16   6   48.70   19.80
  -1 -16   6   76.29    8.00
  -2 -16   6   32.70    6.10
  -3 -16   6  173.98   12.80
  -4 -16   6   29.70    7.10
  -5 -16   6   51.79    8.80
   0  17   6  157.88   30.10
   0  17  -6  141.89   28.10
  -1 -17   6  164.98   12.40
  -2 -17   6   20.00    6.00
  -3 -17   6   48.90    7.90
  -4 -17   6   24.00    6.90
  -5 -17   6   35.60    8.10
   0  18   6   -0.80   15.90
   0  18  -6   -9.10   14.10
  -1 -18   6   76.59    9.00
  -2 -18   6   47.40    7.50
  -3 -18   6   45.10    7.80
  -4 -18   6   41.40    8.30
  -1 -19   6  106.99   10.60
  -2 -19   6   53.09    8.20
  -3 -19   6   20.90    6.80
   0 -20   6   -5.90    5.90
  -1 -20   6    4.00    6.00
   0   0  -7   12.20    2.20
   0   0   7   10.30    2.60
   1   0  -7  636.64   27.80
  -1   0   7  606.74   28.10
  -2   0   7 1094.99   50.09
   2   0  -7 1166.98   49.90
  -3   0   7    2.30    1.50
  -4   0   7   23.00    5.30
  -5   0   7  197.28   15.00
  -6   0   7  302.67   20.00
  -7   0   7   14.10    8.80
  -8   0   7   39.40   12.10
  -9   0   7  128.89   18.10
   0  -1  -7  829.62   35.30
   0  -1   7  819.02   35.60
   0   1   7  798.22   35.50
  -1   1   7   34.90    4.40
   1   1  -7   34.90    3.90
  -1  -1   7   25.60    3.90
   1  -1  -7   40.10    4.10
  -2   1   7  285.47   15.30
   2   1  -7  300.27   14.50
   2  -1  -7  322.77   15.00
  -2  -1   7  229.28   14.30
  -3   1   7  555.64   28.20
  -3  -1   7  616.04   28.20
   4   1   7  446.56   21.70
  -4  -1   7  421.86   22.60
  -6   1   7  229.88   18.40
  -6  -1   7  247.38   17.40
  -7   1   7   29.20    9.30
  -7  -1   7   28.00    9.90
  -8   1   7  387.26   27.10
  -8  -1   7  340.07   26.10
  -9   1   7    1.10   11.50
  -9  -1   7   -6.80   10.30
   0  -2  -7  451.55   19.90
   0  -2   7  468.25   20.40
   0   2   7  425.46   20.10
   1   2  -7  514.25   22.80
  -1   2   7  461.85   23.10
   1   2   7  509.35   21.80
   1  -2  -7  515.25   22.90
  -1  -2   7  497.65   23.00
   2   2  -7 3415.56  140.89
  -2   2   7 3187.68  140.49
   2  -2  -7 3266.97  140.39
  -3   2   7  908.61   42.00
  -3  -2   7  928.61   41.70
   3   2   7  896.21   40.30
  -4   2   7  582.04   30.50
   4   2   7  614.24   28.90
  -4  -2   7  668.03   30.80
  -6   2   7   26.50    9.10
  -6  -2   7   36.80    8.70
  -7   2   7   81.19   13.40
  -7  -2   7   76.69   12.40
  -8   2   7  203.58   21.10
  -8  -2   7  200.78   20.00
  -9   2   7   63.09   15.20
  -9  -2   7   66.29   14.60
   0  -3  -7   79.09    4.90
   0   3   7   71.69    5.40
   0  -3   7   77.79    5.40
  -1   3   7    7.40    3.40
   1   3  -7    9.30    2.60
   1   3   7   10.60    1.70
   1  -3  -7   10.60    3.00
  -2   3   7  592.24   27.70
  -2  -3   7  561.64   26.80
   2  -3  -7  586.84   27.10
  -3   3   7  185.68   12.90
   3   3   7  199.98   10.50
  -3  -3   7  206.38   12.20
  -4   3   7  244.28   15.50
   4   3   7  219.08   12.40
  -4  -3   7  236.88   14.40
  -6   3   7   48.90    9.20
  -6  -3   7   57.29    9.30
  -7   3   7   14.20    9.20
  -7  -3   7   22.10    9.20
  -8   3   7   20.60   11.50
  -8  -3   7   14.80    9.20
   0  -4  -7   96.49    5.70
   0   4   7   98.99    6.40
  -1   4   7  181.08   10.90
   1  -4  -7  189.88   10.40
   1   4   7  195.88    8.90
  -2   4   7  569.74   28.20
  -2  -4   7  604.04   27.60
   2  -4  -7  602.24   27.90
  -3   4   7 1157.48   52.89
   3   4   7 1167.08   49.99
  -3  -4   7 1152.68   51.89
  -4   4   7  290.17   18.30
  -4  -4   7  296.77   17.20
   4   4   7  318.47   15.20
  -5   4   7   -0.10    4.60
  -5  -4   7    4.80    5.70
   5   4   7    1.90    3.40
  -6   4   7   92.79   11.80
  -6  -4   7  113.79   12.00
  -7   4   7  219.68   19.40
  -7  -4   7  177.78   17.30
  -8   4   7    8.70   11.30
  -8  -4   7   19.90    9.60
   0   5   7   -0.50    2.50
   0  -5  -7   -1.30    2.00
  -1   5   7   46.00    5.30
   1   5   7   37.90    3.10
  -1  -5   7   47.00    4.90
   1  -5  -7   42.50    4.80
  -2   5   7  413.36   21.50
  -2  -5   7  429.86   20.70
  -3   5   7  348.17   19.40
   3   5   7  330.47   15.20
  -3  -5   7  350.06   18.00
  -4   5   7  142.99   12.60
  -4  -5   7  147.39   11.00
   4   5   7  149.88    8.40
  -5   5   7  129.09   13.60
   5   5   7  164.68    9.60
  -5  -5   7  148.49   12.20
  -6   5   7  259.77   19.70
  -6  -5   7  242.38   18.00
  -7   5   7  135.49   16.50
  -7  -5   7  146.29   15.40
  -8   5   7   54.59   13.50
  -8  -5   7   62.69   12.80
   0  -6  -7  214.88   10.80
   0   6   7  221.58   11.40
  -1   6   7  224.98   12.60
  -1  -6  -7  220.08    9.40
  -1  -6   7  212.88   11.60
   1  -6  -7  209.38   11.70
  -2   6   7    4.10    4.80
  -2  -6   7   18.80    4.30
  -3   6   7  342.27   19.70
  -3  -6   7  343.37   18.10
  -4   6   7  150.28   13.50
  -4  -6   7  175.08   12.30
   4   6   7  170.38    8.60
  -5   6   7   79.69   11.40
   5   6   7   82.49    6.40
  -5  -6   7   82.39   10.00
  -6   6   7   91.89   13.70
  -6  -6   7   88.49   11.20
  -7   6   7   62.99   11.90
  -7  -6   7   43.90    9.90
  -8   6   7  138.69   18.00
  -8  -6   7  129.99   15.60
   0  -7  -7   36.30    3.70
   0   7   7   30.70    4.10
  -1  -7  -7  732.13   31.30
  -1   7   7  766.22   34.10
   1  -7  -7  736.73   33.50
  -1  -7   7  721.13   33.30
  -2   7   7  339.97   18.60
  -2  -7   7  336.57   17.10
  -3   7   7  484.35   25.50
  -3  -7   7  489.55   24.10
  -4   7   7 1105.19   52.29
   4   7   7 1074.69   47.00
  -4  -7   7 1144.89   50.69
  -5   7   7  145.19   15.50
   5   7   7  170.68    9.10
  -5  -7   7  173.58   13.60
  -6   7   7  126.69   15.80
  -6  -7   7  109.49   12.20
  -7   7   7   27.70   10.80
  -7  -7   7   22.00    8.50
  -8   7   7   38.80   12.10
  -8  -7   7   72.39   12.30
   0  -8  -7  148.49    8.50
  -1   8   7   65.79    6.80
  -1  -8  -7   71.59    3.80
   1  -8  -7   64.19    6.20
  -1  -8   7   59.29    5.80
  -2   8   7  207.48   13.80
  -2  -8   7  209.98   12.00
  -3   8   7  243.28   16.50
  -3  -8   7  237.88   14.20
  -4   8   7  268.67   19.10
  -4  -8   7  288.17   16.80
  -5   8   7  367.86   24.40
  -5  -8   7  385.86   21.70
   5   8   7  374.76   17.10
  -6   8   7  450.25   28.60
  -6  -8   7  427.76   24.90
  -7   8   7   30.70   11.30
  -7  -8   7   23.50    9.30
  -8  -8   7   55.39   12.00
   0  -9  -7  165.18    9.40
  -1  -9  -7  290.97   13.00
  -1  -9   7  294.07   15.10
   1  -9  -7  280.87   15.30
  -2  -9   7   19.70    4.60
  -3   9   7   37.20    7.60
  -3  -9   7   33.70    5.90
  -4   9   7   23.50    8.30
  -4  -9   7   16.10    5.60
  -5   9   7   -2.40    7.00
  -5  -9   7   13.90    6.30
  -6   9   7   47.10   11.20
  -6  -9   7   86.29   11.00
  -7  -9   7   99.79   13.00
  -8  -9   7   21.60   10.10
   0 -10  -7   33.80    4.30
  -1 -10  -7  884.41   39.00
   1 -10  -7  938.61   42.30
  -1 -10   7  897.61   40.60
  -2 -10   7  182.88   11.50
  -3 -10   7   20.80    5.00
  -4 -10   7  149.88   11.80
  -5 -10   7  343.37   20.60
  -6 -10   7   53.39    9.40
  -7 -10   7   73.09   11.40
   0 -11  -7   74.19    6.50
  -1 -11  -7  296.17   14.00
  -1 -11   7  300.17   15.90
  -2 -11   7   49.20    6.20
  -3 -11   7  298.17   16.90
  -4 -11   7  238.98   15.50
  -5 -11   7  135.89   12.60
  -6 -11   7  173.18   15.30
  -7 -11   7   51.79   10.40
   0 -12  -7   32.80    4.70
  -1 -12  -7   17.50    3.00
  -1 -12   7   18.00    4.70
  -2 -12   7  112.59    9.40
  -3 -12   7   67.29    7.60
  -4 -12   7   14.60    5.70
  -5 -12   7  129.09   12.40
  -6 -12   7   14.80    7.60
  -7 -12   7   59.49   10.90
   0 -13  -7  307.67   16.20
  -1 -13  -7   20.40    3.50
  -1 -13   7   26.80    5.20
  -2 -13   7  221.48   13.70
  -3 -13   7  163.08   12.30
  -4 -13   7   10.20    5.60
  -5 -13   7   45.60    8.70
  -6 -13   7   53.99    9.70
   0  14   7   23.20   15.40
   0  14  -7   16.00   13.10
  -1 -14   7  137.99   10.60
  -2 -14   7  280.57   16.40
  -3 -14   7  295.97   17.40
  -4 -14   7   62.79    8.40
  -5 -14   7   86.29   10.50
  -6 -14   7   34.70    8.90
   0  15   7    3.20   12.60
   0  15  -7    7.00   13.60
  -1 -15   7   76.79    8.20
  -2 -15   7   54.69    7.30
  -3 -15   7  139.59   11.70
  -4 -15   7  123.99   12.10
  -5 -15   7  122.39   12.80
  -6 -15   7   72.29   11.20
   0  16   7    2.00   14.60
   0  16  -7    5.20   14.10
  -1 -16   7   71.99    8.10
  -2 -16   7  341.97   19.30
  -3 -16   7  102.69   10.40
  -4 -16   7   61.09    8.80
  -5 -16   7   58.49    9.10
   0  17   7   49.70   21.60
   0  17  -7   49.40   20.80
  -1 -17   7   48.60    7.60
  -2 -17   7  145.79   12.00
  -3 -17   7   79.69    9.60
  -4 -17   7    9.70    6.60
   0  18  -7   -2.50   14.40
   0  18   7   11.40   17.60
  -1 -18   7   27.10    6.90
  -2 -18   7  231.48   15.90
  -3 -18   7   73.29    9.40
  -4 -18   7   87.89   10.80
   0 -19   7   25.70    7.10
  -1 -19   7   35.10    7.30
  -2 -19   7   34.10    7.40
  -3 -19   7    2.50    6.20
   0 -20   7   59.19    9.30
  -1 -20   7   68.29    9.30
   0   0  -8  609.94   26.70
   0   0   8  593.94   26.80
   1   0  -8  259.07   12.60
  -1   0   8  246.88   13.10
  -2   0   8  568.34   26.90
  -3   0   8   92.19    8.30
  -4   0   8  257.77   15.10
  -5   0   8  235.78   16.30
  -6   0   8   38.90    8.60
  -7   0   8    4.20    7.60
  -8   0   8  134.89   16.90
   0  -1   8   72.69    5.60
   0   1   8   77.09    5.60
   0  -1  -8   77.19    5.00
   1   1  -8  430.96   19.60
  -1   1   8  409.16   19.90
   1   1   8  425.46   18.80
  -1  -1   8  427.46   20.00
   1  -1  -8  405.66   19.50
  -2   1   8  426.96   21.00
  -2  -1   8  420.76   20.80
   4   1   8 1097.19   50.09
  -4  -1   8 1074.69   49.99
  -6   1   8 1010.10   48.60
  -6  -1   8  952.30   47.90
  -7   1   8   57.59   11.90
  -7  -1   8   64.29   11.20
  -8   1   8   55.39   12.50
  -8  -1   8   44.50   11.40
   0  -2  -8  127.89    6.70
   0   2   8  118.49    7.10
   0  -2   8  114.29    7.30
  -1   2   8  569.54   26.90
   1   2  -8  581.14   26.40
   1  -2  -8  598.74   26.60
  -1  -2   8  586.74   26.80
   1   2   8  592.54   25.60
  -2   2   8  451.95   22.40
  -3   2   8   17.70    5.50
  -3  -2   8   13.40    4.30
  -4   2   8  227.88   15.70
   4   2   8  237.18   13.30
  -4  -2   8  245.08   14.90
  -5   2   8   -0.50    2.20
  -5  -2   8    9.70    6.30
  -6   2   8  170.58   15.70
  -6  -2   8  177.98   14.90
  -7   2   8  237.38   20.40
  -7  -2   8  208.48   18.80
  -8   2   8  162.38   18.10
  -8  -2   8  133.59   16.20
   0  -3  -8  248.78   11.70
   0  -3   8  239.28   12.20
   0   3   8  245.38   12.10
  -1   3   8  221.88   12.10
   1   3  -8  227.58   11.40
   1  -3  -8  216.18   11.40
   1   3   8  221.98   10.30
  -1  -3   8  197.18   11.30
  -2   3   8  928.01   41.30
  -2  -3   8  884.21   40.60
  -3   3   8 1782.32   75.59
  -3  -3   8 1603.04   74.59
   3   3   8 1725.43   73.29
  -4   3   8  291.37   18.40
  -4  -3   8  297.87   17.60
   4   3   8  303.57   15.40
  -5  -3   8   68.19    9.40
  -6   3   8   62.29   10.20
  -6  -3   8   59.89   10.20
  -7   3   8  187.78   17.80
  -7  -3   8  193.08   17.80
  -8   3   8   53.79   12.60
  -8  -3   8   52.39   12.20
   0  -4   8   28.80    3.80
   0   4   8   25.90    3.50
   0  -4  -8   31.60    3.10
  -1   4   8 1040.90   46.80
   1  -4  -8 1094.19   46.60
   1   4   8 1044.60   45.30
  -2   4   8 1214.58   54.59
   2   4   8 1229.18   51.79
  -2  -4   8 1226.18   54.09
  -3   4   8  132.89   11.30
  -3  -4   8  124.49    9.90
   3   4   8  129.39    7.30
  -4   4   8 1100.29   51.19
   4   4   8 1127.09   47.90
  -4  -4   8 1038.80   49.99
  -5   4   8   38.00    9.00
  -5  -4   8   34.70    7.20
   5   4   8   41.90    5.30
  -6   4   8   14.30    7.60
  -6  -4   8   31.00    8.50
  -7   4   8  310.07   23.30
  -7  -4   8  307.57   22.00
  -8   4   8   57.89   13.30
  -8  -4   8   90.49   14.30
   0   5   8 1785.22   75.49
   0  -5  -8 1738.23   75.09
  -1   5   8 1370.56   61.09
   1   5   8 1416.16   59.49
   1  -5  -8 1412.96   60.79
  -1  -5   8 1387.36   60.89
  -2   5   8 3454.75  148.99
  -2  -5   8 3494.45  148.39
  -3   5   8  126.59   11.10
  -3  -5   8  113.99    9.40
   3   5   8  111.39    6.00
  -4   5   8  529.55   27.70
   4   5   8  511.35   23.30
  -4  -5   8  500.85   26.10
  -5   5   8  322.17   20.80
  -5  -5   8  327.37   19.60
   5   5   8  305.77   15.80
  -6   5   8  212.88   17.90
  -6  -5   8  231.58   16.70
  -7   5   8  129.39   15.80
  -7  -5   8  140.39   14.70
  -8   5   8   65.09   14.10
  -8  -5   8   84.39   13.40
   0  -6  -8    2.00    2.10
   0   6   8    7.00    2.90
  -1   6   8   97.59    7.60
   1  -6  -8   81.19    6.70
  -1  -6   8   77.29    6.90
   1   6   8   84.19    4.90
  -2   6   8  879.81   41.00
  -2  -6   8  895.21   40.20
  -3   6   8  850.11   40.90
  -3  -6   8  864.01   39.70
  -4   6   8  359.86   21.80
  -4  -6   8  364.36   19.70
   4   6   8  352.26   16.20
  -5   6   8  186.78   16.10
  -5  -6   8  187.18   14.40
   5   6   8  188.18   10.30
  -6   6   8  420.66   25.80
  -6  -6   8  368.96   23.30
  -7   6   8  145.49   17.60
  -7  -6   8  105.59   13.30
  -8   6   8    8.50   10.90
  -8  -6   8   -3.00    9.20
   0  -7  -8  169.88    8.80
   0   7   8  155.38    9.50
  -1   7   8  143.19   10.50
  -1  -7  -8  161.68    7.20
   1  -7  -8  156.88    9.80
  -1  -7   8  174.98   10.10
  -2   7   8   91.79    9.30
  -2  -7   8  102.59    8.20
  -3   7   8  201.68   15.20
  -3  -7   8  236.98   13.80
  -4   7   8   37.70    8.40
  -4  -7   8   24.80    6.10
   4   7   8   22.90    2.20
  -5   7   8  125.09   14.20
   5   7   8  107.29    6.60
  -5  -7   8  106.29   10.90
  -6   7   8    6.90    8.90
  -6  -7   8    8.30    6.80
  -7   7   8   52.29   12.30
  -7  -7   8   72.19   11.90
  -8   7   8   49.00   13.70
  -8  -7   8   23.70   10.50
   0  -8  -8  176.78    9.50
  -1   8   8  347.07   17.80
  -1  -8  -8  333.47   14.60
  -1  -8   8  330.37   16.90
   1  -8  -8  336.97   17.10
  -2   8   8    5.10    5.00
  -2  -8   8   12.20    4.20
  -3   8   8   35.30    7.60
  -3  -8   8   57.79    6.70
  -4   8   8  279.07   19.10
  -4  -8   8  256.87   16.30
  -5   8   8  250.97   18.50
  -5  -8   8  238.18   16.20
   5   8   8  220.28   10.70
  -6   8   8  121.39   16.00
  -6  -8   8  129.39   13.60
  -7   8   8   56.49   13.60
  -7  -8   8   25.20    9.00
  -8   8   8   56.79   13.20
  -8  -8   8   34.70   11.10
   0  -9  -8 3632.34  154.08
  -1  -9  -8   68.89    3.90
  -1  -9   8   75.89    6.60
   1  -9  -8   60.49    6.30
  -2   9   8   35.50    6.50
  -2  -9   8   31.80    5.10
  -3   9   8   -4.70    5.80
  -3  -9   8   -0.50    4.20
  -4   9   8   13.00    7.90
  -4  -9   8   14.30    5.50
  -5   9   8    2.50    7.50
  -5  -9   8    0.70    5.80
  -6   9   8  116.89   15.60
  -6  -9   8   76.79   11.00
  -7   9   8   26.20   11.40
  -7  -9   8   38.50    9.60
  -8  -9   8   30.00   10.40
   0 -10  -8  158.68    9.20
  -1 -10  -8  121.99    6.40
  -1 -10   8  138.29    9.40
  -2 -10   8  119.99    9.40
  -3 -10   8    9.70    4.60
  -4  10   8  569.64   31.20
  -4 -10   8  573.14   29.10
  -5 -10   8   96.79   10.70
  -6 -10   8  161.68   15.20
  -7 -10   8   52.49   11.20
   0 -11  -8   17.90    3.60
  -1 -11  -8   66.29    4.40
  -1 -11   8   54.29    6.20
  -2 -11   8  237.08   14.10
  -3 -11   8  292.27   17.00
  -4 -11   8  697.03   34.20
  -5 -11   8  139.89   13.10
  -6 -11   8  172.08   15.50
  -7 -11   8   58.69   11.50
   0 -12  -8   35.70    4.60
  -1 -12  -8  206.58   10.40
  -1 -12   8  210.58   12.90
  -2 -12   8  103.29    9.30
  -3 -12   8  113.09   10.40
  -4 -12   8  283.37   17.80
  -5 -12   8  123.39   12.60
  -6 -12   8    8.30    7.70
  -7 -12   8   62.59   11.50
   0 -13  -8  251.47   13.70
  -1 -13  -8  224.78   11.30
  -1 -13   8  228.88   13.90
  -2 -13   8  237.78   14.70
  -3 -13   8  302.37   17.70
  -4 -13   8   93.19   10.30
  -5 -13   8   29.80    7.90
  -6 -13   8   24.70    8.60
   0  14   8  286.37   32.80
  -1 -14   8   82.09    8.20
  -2 -14   8  152.28   11.70
  -3 -14   8  174.98   13.10
  -4 -14   8  135.89   12.60
  -5 -14   8   47.10    8.70
  -6 -14   8   96.29   12.50
   0  15   8   44.70   18.90
  -1 -15   8  183.68   12.90
  -2 -15   8  111.19   10.50
  -3 -15   8   43.00    7.60
  -4 -15   8  237.18   16.70
  -5 -15   8   44.10    8.80
   0  16   8   10.60   15.80
  -1 -16   8  153.98   12.20
  -2 -16   8    5.10    5.10
  -3 -16   8   14.80    6.20
  -4 -16   8   -5.10    5.60
  -5 -16   8   96.39   11.70
   0  17   8   38.40   21.40
  -1 -17   8  239.88   15.70
  -2 -17   8   71.69    9.00
  -3 -17   8  232.28   16.10
  -4 -17   8   27.60    7.60
   0 -18   8  117.19   11.30
  -1 -18   8   53.39    8.00
  -2 -18   8   15.80    6.50
  -3 -18   8   47.00    8.40
   0 -19   8    8.10    6.80
  -1 -19   8   49.80    8.20
  -2 -19   8   69.39    9.60
   0   0   9   -1.20    2.50
  -1   0   9  130.99    8.70
   1   0   9  149.09    7.70
   1   0  -9  140.69    8.40
  -2   0   9  253.57   14.10
  -3   0   9   80.09    8.50
  -4   0   9   -0.70    0.50
  -5   0   9    2.80    3.90
  -6   0   9  979.00   48.30
  -7   0   9  167.38   17.90
  -8   0   9    6.30   10.20
   0  -1   9   39.90    4.20
   0  -1  -9   48.10    4.10
   0   1   9   42.10    4.20
   1   1  -9 1703.13   72.19
  -1   1   9 1615.84   72.49
   1  -1  -9 1693.63   72.19
   1   1   9 1655.23   71.49
  -1  -1   9 1716.53   72.59
  -2   1   9 1299.47   56.09
  -2  -1   9 1222.18   55.69
  -3  -1   9  264.97   14.80
  -4   1   9    9.30    4.90
  -4  -1   9   16.20    5.10
  -6   1   9  164.58   14.80
  -6  -1   9  148.59   14.40
  -7   1   9   33.80   10.20
  -7  -1   9   65.49   11.90
  -8   1   9  262.77   23.40
  -8  -1   9  287.17   23.50
   0  -2  -9  211.68   10.60
   0   2   9  207.08   11.00
   0  -2   9  228.48   11.40
  -1   2   9  615.84   29.00
   1   2   9  640.84   27.80
  -1  -2   9  620.74   28.90
   1  -2  -9  649.14   28.60
  -2   2   9 1205.68   53.59
  -2  -2   9 1200.98   53.39
  -3  -2   9  151.68   10.10
  -4   2   9  192.08   14.30
   4   2   9  188.28   11.40
  -4  -2   9  190.48   13.60
  -5  -2   9   16.80    6.30
  -6   2   9  261.07   19.20
  -6  -2   9  269.47   19.40
  -7   2   9  292.67   21.70
  -7  -2   9  280.97   21.60
  -8   2   9   49.20   13.50
  -8  -2   9   53.79   12.80
   0  -3   9  248.78   12.80
   0  -3  -9  246.08   12.00
   0   3   9  249.97   12.50
  -1   3   9 1155.08   51.49
   1  -3  -9 1194.48   51.19
   1   3   9 1149.78   50.19
  -1  -3   9 1188.18   51.49
  -3   3   9  486.25   24.50
  -3  -3   9  453.75   23.40
  -4   3   9   73.59    9.50
  -4  -3   9   59.09    7.90
  -5   3   9   15.50    6.60
  -5  -3   9    4.30    5.70
  -6   3   9  100.69   12.80
  -6  -3   9  109.29   12.10
  -7   3   9   13.70    9.70
  -7  -3   9   29.70    9.30
  -8   3   9  118.29   17.40
  -8  -3   9  108.89   15.40
   0  -4   9 2538.75  108.39
   0  -4  -9 2613.34  107.79
   0   4   9 2465.85  108.09
  -1   4   9   38.90    5.10
   1  -4  -9   40.10    4.50
   1   4   9   43.70    3.80
  -2   4   9   45.70    6.40
   2   4   9   48.60    3.30
  -2  -4   9   52.49    5.90
  -3   4   9   63.89    8.20
   3   4   9   76.09    5.40
  -3  -4   9   72.89    7.70
  -4   4   9  151.78   13.50
   4   4   9  151.38    9.20
  -4  -4   9  161.08   12.30
  -5   4   9  334.47   22.50
   5   4   9  377.36   18.50
  -5  -4   9  364.96   21.60
  -6   4   9  301.07   21.60
  -6  -4   9  310.17   20.70
  -7   4   9   38.10   10.40
  -7  -4   9   39.30   10.10
  -8   4   9   10.50   11.10
  -8  -4   9    3.90    9.70
   0   5   9   83.59    6.50
   0  -5   9   98.69    6.70
   0  -5  -9   82.89    5.60
  -1   5   9 1073.49   47.50
   1  -5  -9 1074.49   46.90
   1   5   9 1068.49   45.70
  -1  -5   9 1043.20   47.10
  -2   5   9  474.75   24.00
  -2  -5   9  495.15   23.50
   2   5   9  467.25   20.60
  -3   5   9   75.99    8.70
   3   5   9   81.29    5.00
  -3  -5   9   92.29    8.70
  -4   5   9   39.00    8.10
  -4  -5   9   41.40    7.10
   4   5   9   33.90    3.90
  -5   5   9  479.05   27.60
   5   5   9  486.95   23.00
  -5  -5   9  492.05   26.40
  -6   5   9  277.17   21.60
  -6  -5   9  285.37   19.80
  -7   5   9  268.57   22.50
  -7  -5   9  288.07   21.20
  -8   5   9   76.69   14.90
  -8  -5   9   74.89   13.60
   0  -6  -9  401.26   18.70
   0   6   9  415.16   19.30
  -1   6   9  189.58   11.50
   1  -6  -9  187.48   10.80
  -1  -6   9  178.38   11.10
   1   6   9  202.48    9.40
  -2   6   9   32.40    6.00
  -2  -6   9   19.30    4.30
  -3   6   9  325.57   18.30
  -3  -6   9  291.87   16.90
  -4   6   9   60.49    9.90
  -4  -6   9   54.19    7.60
   4   6   9   66.39    4.50
  -5   6   9  117.79   14.00
   5   6   9  137.09    8.10
  -5  -6   9  124.99   11.90
  -6   6   9   38.70    9.80
  -6  -6   9   30.90    8.50
  -7   6   9   65.09   12.50
  -7  -6   9   62.09   11.00
  -8   6   9   55.19   12.80
  -8  -6   9   22.50   10.40
   0  -7  -9 1789.42   76.19
   0   7   9 1774.22   76.79
  -1   7   9  259.27   14.60
  -1  -7   9  268.17   14.20
   1  -7  -9  259.37   13.80
  -2   7   9  612.14   30.40
  -2  -7   9  636.24   29.70
  -3   7   9  438.06   24.20
  -3  -7   9  441.46   22.50
  -4   7   9  122.29   13.10
  -4  -7   9  119.09   10.50
  -5   7   9   10.80    8.20
   5   7   9    9.90    2.50
  -5  -7   9    6.20    5.60
  -6   7   9  308.17   22.70
  -6  -7   9  309.97   20.10
  -7   7   9  201.38   20.80
  -7  -7   9  179.58   17.50
  -8   7   9    3.00   10.00
  -8  -7   9    7.40    9.10
   0  -8  -9  398.76   18.50
   0   8   9  392.36   19.20
  -1   8   9  379.16   19.90
  -1  -8  -9  384.06   16.80
  -1  -8   9  398.46   19.60
   1  -8  -9  397.06   19.20
  -2   8   9   19.60    5.80
  -2  -8   9   19.80    4.50
  -3   8   9  508.45   26.50
  -3  -8   9  469.65   24.40
  -4   8   9   27.70    8.50
  -4  -8   9   28.40    6.20
  -5   8   9  215.08   17.70
  -5  -8   9  207.48   15.60
  -6   8   9   77.69   13.10
  -6  -8   9  105.29   12.40
  -7   8   9   61.99   13.30
  -7  -8   9   66.99   11.40
  -8   8   9   53.59   14.60
  -8  -8   9   53.29   12.20
   0  -9  -9   11.10    3.00
  -1  -9  -9  306.67   13.70
  -1   9   9  305.67   17.10
   1  -9  -9  317.17   16.30
  -1  -9   9  325.07   16.60
  -2   9   9  230.08   15.40
  -2  -9   9  239.48   14.00
  -3   9   9   46.90    8.00
  -3  -9   9   39.20    6.50
  -4   9   9   78.79   11.50
  -4  -9   9   79.89    9.30
  -5   9   9  383.96   25.30
  -5  -9   9  383.16   22.60
  -6   9   9  395.06   27.20
  -6  -9   9  387.56   24.00
  -7   9   9   33.70   12.50
  -7  -9   9   37.60   10.50
   0 -10  -9   52.39    4.90
  -1 -10  -9  670.53   28.60
  -1 -10   9  659.13   31.30
  -2 -10   9    7.10    4.50
  -3  10   9   76.89   10.50
  -3 -10   9   70.79    8.00
  -4  10   9   57.59   10.40
  -4 -10   9   66.19    8.40
  -5  10   9   37.50   10.10
  -5 -10   9   31.70    7.80
  -6  10   9   61.89   12.80
  -6 -10   9   76.49   11.40
  -7 -10   9    5.90    8.40
   0 -11  -9 1079.09   47.50
  -1 -11  -9   34.00    3.10
  -1 -11   9   32.30    5.30
  -2 -11   9  169.68   11.90
  -3 -11   9   64.19    8.00
  -4 -11   9   79.79    9.60
  -5 -11   9  144.09   13.60
  -6 -11   9  171.48   16.30
  -7 -11   9  143.69   15.80
   0 -12  -9  170.68   10.10
  -1 -12   9   25.00    5.10
  -2 -12   9  387.66   20.70
  -3 -12   9  498.45   25.80
  -4 -12   9  259.37   17.00
  -5 -12   9   36.40    7.90
  -6 -12   9   24.20    8.60
  -7 -12   9   -8.70    7.90
   0 -13  -9   20.00    4.00
  -1 -13  -9   61.29    5.50
  -1 -13   9   46.30    6.70
  -2 -13   9  260.57   15.90
  -3 -13   9  184.08   13.60
  -4 -13   9   13.50    6.20
  -5 -13   9  133.59   13.20
  -6 -13   9   48.00   10.30
   0  14   9   89.39   20.90
  -1 -14   9   17.90    5.10
  -2 -14   9   63.79    8.10
  -3 -14   9   72.99    9.00
  -4 -14   9  128.59   12.40
  -5 -14   9   39.70    9.10
  -6 -14   9   79.39   11.70
   0  15   9  327.87   36.40
  -1 -15   9   67.19    8.20
  -2 -15   9   92.19    9.70
  -3 -15   9  224.58   15.60
  -4 -15   9   30.00    7.40
  -5 -15   9   27.90    8.20
   0  16   9   19.40   17.00
  -1 -16   9    5.00    5.30
  -2 -16   9  200.48   14.50
  -3 -16   9   32.00    7.50
  -4 -16   9   92.29   11.20
  -5 -16   9   10.30    7.30
   0 -17   9   -1.60    5.80
  -1 -17   9   22.80    6.80
  -2 -17   9  279.77   17.80
  -3 -17   9    0.30    6.10
  -4 -17   9   44.10    9.00
   0 -18   9   71.69    9.90
  -1 -18   9  138.19   12.90
  -2 -18   9   60.29    9.00
  -3 -18   9    4.70    6.10
   0 -19   9   42.60    8.80
  -1 -19   9    1.40    6.00
  -2 -19   9    2.00    6.20
   0   0  10   17.40    3.50
  -1   0  10 1891.41   83.19
   1   0  10 1959.10   82.29
  -2   0  10   43.10    5.80
  -3   0  10   10.80    4.80
  -4   0  10   -1.40    2.30
  -5   0  10    0.40    3.00
  -6   0  10  188.38   16.00
  -7   0  10  288.27   21.60
  -8   0  10    3.40    9.20
   0  -1 -10   44.80    4.10
   0  -1  10   42.60    4.60
   0   1  10   42.10    4.40
   1  -1  10  100.49    6.60
  -1   1  10   94.29    7.90
   1  -1 -10  104.79    7.10
  -1  -1  10  111.99    8.10
   1   1  10  108.09    6.40
  -2   1  10 1107.99   50.09
  -2  -1  10 1129.99   50.19
  -3   1  10  529.15   26.20
  -3  -1  10  501.25   25.50
  -5  -1  10   88.09   10.50
  -6   1  10   84.79   11.60
  -6  -1  10   76.29   11.70
  -7   1  10   16.50    9.60
  -7  -1  10   38.40    9.90
  -8   1  10  348.47   25.40
  -8  -1  10  341.37   25.80
   0   2  10  179.78    9.80
   0  -2 -10  184.78    9.30
   0  -2  10  162.78    9.90
  -1   2  10  348.17   18.30
   1   2  10  381.56   17.00
   1  -2 -10  374.16   17.80
  -1  -2  10  369.86   18.40
  -2   2  10 1353.06   59.69
  -2  -2  10 1330.77   59.39
  -3   2  10   68.59    7.90
  -4   2  10  362.36   20.70
   4   2  10  356.06   18.40
  -5   2  10  590.24   34.00
  -5  -2  10  772.72   35.30
  -6   2  10   40.00    9.00
  -6  -2  10   45.70    9.00
  -7   2  10  122.39   14.90
  -7  -2  10   91.79   13.00
  -8   2  10   56.59   12.80
  -8  -2  10   53.69   13.20
   0   3  10   39.40    4.40
   0  -3 -10   38.80    3.70
   0  -3  10   34.90    4.40
  -1   3  10 1309.57   58.19
  -1  -3  10 1349.77   58.19
   1   3  10 1305.37   56.89
   1  -3 -10 1339.47   57.69
  -2   3  10  101.09    8.30
  -2  -3  10   66.69    6.60
   2   3  10   84.59    5.00
  -3   3  10  384.36   20.10
  -3  -3  10  327.87   18.60
  -4   3  10  204.38   14.40
  -4  -3  10  186.18   13.40
   4   3  10  195.78   11.40
  -5   3  10  318.27   21.20
  -5  -3  10  329.47   19.90
  -6   3  10   33.40    8.60
  -6  -3  10   24.70    8.60
  -7   3  10   -3.70    7.70
  -7  -3  10    9.00    7.90
  -8   3  10  140.49   17.70
  -8  -3  10  193.48   19.80
   0   4  10   13.10    3.30
   0  -4 -10   11.80    2.60
   0  -4  10   12.50    3.40
  -1   4  10  173.88   10.70
   1   4  10  166.28    8.70
   1  -4 -10  182.28    9.90
  -1  -4  10  158.48   10.30
  -2   4  10  508.75   24.70
   2   4  10  484.85   21.60
  -3   4  10  139.29   11.50
  -3  -4  10  154.88   10.80
  -4   4  10  300.07   19.70
   4   4  10  325.47   15.90
  -4  -4  10  318.57   18.90
  -5   4  10   29.70    8.30
   5   4  10   33.80    5.10
  -5  -4  10   49.40    8.70
  -6   4  10  156.28   15.80
  -6  -4  10  169.08   15.80
  -7   4  10  145.19   17.10
  -7  -4  10  119.19   14.30
  -8   4  10   42.40   12.40
  -8  -4  10   52.09   12.00
   0  -5  10  687.23   31.50
   0   5  10  687.83   31.20
   0  -5 -10  703.13   30.60
  -1   5  10   59.99    6.30
   1   5  10   65.09    4.70
   1  -5 -10   48.10    5.30
  -2   5  10  693.73   32.70
   2   5  10  679.63   29.50
  -2  -5  10  683.83   32.10
  -3   5  10  900.21   43.80
  -3  -5  10  958.60   43.40
   3   5  10  946.31   40.50
  -4   5  10  944.21   46.40
  -4  -5  10  995.90   45.60
   4   5  10  959.10   42.30
  -5   5  10   26.60    8.90
  -5  -5  10   40.60    7.90
   5   5  10   43.30    5.00
  -6   5  10  601.84   34.10
  -6  -5  10  589.94   32.50
  -7   5  10    6.50    9.00
  -7  -5  10   15.70    8.60
  -8   5  10  109.19   16.90
  -8  -5  10   84.19   14.50
   0  -6 -10  698.83   30.70
   0   6  10  689.73   31.30
  -1   6  10  254.87   14.70
   1  -6 -10  252.77   13.90
   1   6  10  282.57   12.70
  -1  -6  10  265.67   14.30
  -2   6  10  421.66   21.80
  -2  -6  10  410.46   20.90
  -3   6  10  244.48   16.20
  -3  -6  10  235.28   14.50
  -4   6  10  132.59   13.00
  -4  -6  10  136.29   11.80
   4   6  10  112.79    6.40
  -5   6  10   47.20   10.40
  -5  -6  10   41.00    7.80
   5   6  10   44.90    4.50
  -6   6  10   -0.70    8.90
  -6  -6  10   -3.90    6.90
  -7   6  10  356.76   26.80
  -7  -6  10  340.27   23.90
  -8   6  10   19.90   11.30
  -8  -6  10   25.80   10.00
   0  -7  10 1082.99   51.89
   0   7  10 1226.38   51.79
   0  -7 -10 1231.38   51.19
  -1   7  10  156.38   10.60
   1  -7 -10  152.68    9.50
   1   7  10  147.19    7.90
  -1  -7  10  155.38    9.80
  -2   7  10  256.47   15.80
  -2  -7  10  265.87   14.80
  -3   7  10  125.19   11.90
  -3  -7  10  106.09   10.20
  -4   7  10   24.00    8.10
  -4  -7  10   23.60    6.70
  -5   7  10   84.19   11.60
  -5  -7  10   79.79    9.90
  -6   7  10  500.75   31.30
  -6  -7  10  509.95   28.80
  -7   7  10   21.30   10.40
  -7  -7  10   23.70    8.80
  -8   7  10   32.20   12.10
  -8  -7  10   29.20   11.30
   0   8  10    9.20    3.50
   0  -8  10   14.80    3.60
   0  -8 -10    6.70    2.60
  -1   8  10  342.17   17.90
  -1  -8  10  324.17   17.40
   1  -8 -10  334.07   16.90
  -2   8  10   99.29    9.80
  -2  -8  10   96.39    8.80
  -3   8  10   47.30    8.40
  -3  -8  10   57.99    7.20
  -4   8  10  164.58   15.60
  -4  -8  10  173.88   13.50
  -5   8  10   16.50    8.70
  -5  -8  10   15.20    7.00
  -6   8  10   58.69   12.50
  -6  -8  10   29.30    9.00
  -7   8  10   26.50   11.20
  -7  -8  10    3.30    8.50
   0  -9 -10  415.36   19.40
  -1  -9 -10   45.20    2.90
  -1   9  10   45.10    6.60
  -1  -9  10   48.60    6.20
   1  -9 -10   52.29    6.10
  -2   9  10   72.79    8.70
  -2  -9  10   67.19    7.30
  -3   9  10  249.38   17.40
  -3  -9  10  247.38   15.60
  -4   9  10  162.58   15.70
  -4  -9  10  154.18   12.40
  -5   9  10    9.60    8.80
  -5  -9  10   10.60    6.70
  -6   9  10  262.97   22.20
  -6  -9  10  228.18   18.40
  -7   9  10   11.50   11.10
  -7  -9  10   15.00    9.10
   0 -10 -10  151.08    8.80
  -1 -10 -10  193.38    8.80
  -1 -10  10  195.78   12.00
  -2  10  10   -5.50    5.20
  -2 -10  10    9.00    4.40
  -3  10  10   67.79   10.00
  -3 -10  10   72.49    8.30
  -4  10  10   47.00   10.00
  -4 -10  10   50.49    8.50
  -5  10  10  330.17   23.00
  -5 -10  10  346.07   21.30
  -6  10  10   23.40   10.50
  -6 -10  10   35.40    9.50
  -7  10  10   25.30   10.90
  -7 -10  10    4.00    8.10
   0 -11 -10   58.49    5.40
  -1 -11  10  864.31   40.00
  -2 -11  10   34.90    6.00
  -3 -11  10   36.10    6.60
  -4  11  10   88.39   12.20
  -4 -11  10  104.09   11.00
  -5 -11  10  491.75   27.50
  -6 -11  10  195.98   17.20
  -7 -11  10   -0.30    7.70
   0 -12 -10  140.69    8.80
  -1 -12 -10  297.77   13.30
  -1 -12  10  298.47   16.70
  -2 -12  10   99.89    9.70
  -3 -12  10   34.80    6.90
  -4 -12  10   98.39   11.20
  -5 -12  10   52.59    9.70
  -6 -12  10   34.50    9.70
   0  13  10   22.60   14.60
  -1 -13  10   60.19    7.30
  -2 -13  10  120.89   10.70
  -3 -13  10   52.99    8.40
  -4 -13  10   27.90    7.70
  -5 -13  10   47.10    9.40
  -6 -13  10   63.49   10.90
   0  14  10   71.19   19.70
  -1 -14  10   79.19    8.50
  -2 -14  10  158.28   12.40
  -3 -14  10  108.99   10.80
  -4 -14  10   32.60    7.70
  -5 -14  10   96.89   11.90
  -6 -14  10    9.80    8.20
   0 -15  10  135.19   11.80
  -1 -15  10  413.96   22.50
  -2 -15  10  220.58   15.20
  -3 -15  10   48.40    8.50
  -4 -15  10   19.80    7.40
  -5 -15  10  105.49   12.80
   0 -16  10  268.37   16.70
  -1 -16  10   61.99    8.60
  -2 -16  10  177.78   14.20
  -3 -16  10   87.29   10.50
  -4 -16  10  105.89   12.30
   0 -17  10    0.20    6.00
  -1 -17  10    4.20    6.00
  -2 -17  10   26.10    7.20
  -3 -17  10  245.98   17.40
  -4 -17  10   51.99    9.70
   0 -18  10   47.20    8.80
  -1 -18  10   12.90    6.40
  -2 -18  10   12.50    7.00
  -3 -18  10   -8.30    6.10
   0 -19  10   13.20    7.50
  -1 -19  10   22.10    7.60
   0   0  11   15.20    3.30
  -1   0  11  310.27   16.10
   1   0  11  306.37   14.80
  -2   0  11  241.38   14.30
  -3   0  11   22.00    5.60
  -4   0  11   -3.90    3.70
  -5   0  11  229.18   15.50
  -6   0  11    6.70    7.40
  -7   0  11    5.10    8.50
  -8   0  11  171.38   18.80
   0  -1 -11    2.50    2.30
   0   1  11    5.60    3.00
   0  -1  11    2.90    2.70
   1  -1  11  457.05   20.10
  -1   1  11  425.16   21.00
  -1  -1  11  422.66   20.90
   1   1  11  414.26   19.80
  -2   1  11  188.48   12.00
  -2  -1  11  194.18   12.00
  -3   1  11  107.79    9.90
  -3  -1  11  112.99   10.30
  -5   1  11   54.29    8.70
  -5  -1  11   51.09    8.50
  -6   1  11  196.58   16.10
  -6  -1  11  138.59   15.20
  -7   1  11   93.59   13.30
  -7  -1  11   97.49   13.80
  -8   1  11   32.70   11.70
  -8  -1  11   27.60   10.80
   0  -2  11  782.22   34.90
   0   2  11  766.12   34.60
   0  -2 -11  777.32   34.20
   1  -2  11  894.01   38.80
  -1   2  11  856.51   39.60
  -1  -2  11  885.71   39.60
   1   2  11  873.91   38.40
  -2   2  11   27.40    5.30
  -2  -2  11   22.90    4.90
   2   2  11   28.80    3.10
  -3   2  11  427.16   22.00
  -3  -2  11  378.96   20.70
  -5   2  11  142.19   13.50
  -5  -2  11  152.38   14.20
  -6   2  11   46.80    9.50
  -6  -2  11   53.49    9.80
  -7   2  11   90.09   13.80
  -7  -2  11   68.49   12.30
  -8   2  11   51.09   13.00
  -8  -2  11   45.80   12.30
   0  -3  11   81.49    6.50
   0  -3 -11   84.09    5.70
   0   3  11   85.79    6.60
  -1   3  11   34.40    5.00
  -1  -3  11   33.60    5.00
   1   3  11   32.40    3.50
   1  -3 -11   24.30    4.20
  -2   3  11   66.49    7.50
   2   3  11   62.29    4.60
  -2  -3  11   77.79    7.40
  -3   3  11  279.57   17.20
  -4   3  11 1466.85   66.79
   4   3  11 1453.25   63.99
  -5   3  11  649.54   34.70
  -5  -3  11  683.73   34.30
  -6   3  11   83.59   12.50
  -6  -3  11   88.89   12.20
  -7   3  11   11.60    8.90
  -7  -3  11   19.90    9.60
  -8   3  11   17.30   10.50
  -8  -3  11   11.60   10.50
   0  -4  11  153.68    9.60
   0  -4 -11  154.28    8.30
   0   4  11  148.29    9.20
  -1   4  11   63.19    6.40
  -1  -4  11   63.99    6.50
   1   4  11   55.49    4.80
   1  -4 -11   52.99    5.30
  -2   4  11   45.40    6.70
   2   4  11   62.29    4.30
  -3   4  11   12.10    5.90
  -3  -4  11   21.80    5.20
  -4   4  11  104.29   11.20
  -4  -4  11  126.69   11.80
   4   4  11  122.19    8.20
  -5   4  11   87.49   12.00
  -5  -4  11   86.79   10.90
   5   4  11   78.79    7.60
  -6   4  11  411.16   26.50
  -6  -4  11  395.86   25.00
  -7   4  11   38.50   11.10
  -7  -4  11   23.30    9.30
  -8   4  11  134.69   17.50
  -8  -4  11  168.58   18.20
   0   5  11    4.20    3.10
   0  -5  11    6.60    3.50
   0  -5 -11    9.70    2.50
  -1   5  11   93.49    7.90
   1  -5 -11   80.79    6.60
  -1  -5  11   70.29    6.20
   1   5  11   89.99    5.90
  -2   5  11  347.97   19.20
   2   5  11  345.57   15.70
  -2  -5  11  359.16   18.30
  -3   5  11  385.06   21.30
   3   5  11  384.56   17.00
  -3  -5  11  389.66   20.60
   3   5  11  377.86   17.60
  -4   5  11  194.78   14.50
   4   5  11  171.48    9.60
  -4  -5  11  170.98   13.10
  -5   5  11  255.97   19.50
   5   5  11  251.17   13.50
  -5  -5  11  257.37   17.90
  -6   5  11   49.50   11.50
  -6  -5  11   62.59   10.90
  -7   5  11  692.43   37.70
  -7  -5  11  580.64   35.10
  -8   5  11   67.09   14.10
  -8  -5  11   96.19   14.70
   0   6  11  465.85   22.10
   0  -6  11  448.86   22.30
   0  -6 -11  484.95   21.40
  -1   6  11  404.16   21.70
   1   6  11  455.05   20.00
   1  -6 -11  443.06   21.10
  -2   6  11  120.89   10.50
  -2  -6  11  119.49    9.80
   2   6  11  122.79    6.20
  -3   6  11 1068.79   48.60
   3   6  11 1027.30   43.70
  -3  -6  11 1006.30   47.60
  -4   6  11  179.38   14.80
  -4  -6  11  192.68   13.90
   4   6  11  190.38    9.30
  -5   6  11   19.30    8.30
  -5  -6  11   16.70    7.20
  -6   6  11  175.18   17.60
  -6  -6  11  168.48   16.30
  -7   6  11  193.78   20.50
  -7  -6  11  182.78   18.30
  -8   6  11  124.69   17.80
  -8  -6  11   83.79   14.20
   0   7  11 2462.35  107.09
   0  -7 -11 2538.45  106.39
  -1   7  11   61.69    6.60
  -1  -7  11   44.60    5.70
   1  -7 -11   52.39    5.90
   1   7  11   48.70    4.20
  -2   7  11  567.24   27.90
  -2  -7  11  543.45   27.20
  -3   7  11   28.90    7.30
  -3  -7  11   24.90    6.10
  -4   7  11  199.98   16.60
  -4  -7  11  205.98   14.40
  -5   7  11  116.59   14.40
  -5  -7  11  120.39   12.70
  -6   7  11   33.00   10.30
  -6  -7  11   31.40    8.50
  -7   7  11  127.29   16.20
  -7  -7  11   87.29   12.90
   0  -8 -11  458.05   21.20
   0   8  11  464.25   22.10
  -1   8  11  407.66   21.20
   1   8  11  417.56   18.80
  -1  -8  11  414.86   20.80
  -2   8  11  419.96   23.40
  -2  -8  11  458.15   22.60
  -3   8  11   47.50    8.00
  -3  -8  11   37.00    6.60
  -4   8  11  220.68   18.20
  -4  -8  11  250.17   16.40
  -5   8  11  159.88   16.30
  -5  -8  11  179.98   15.20
  -6   8  11   19.30    9.70
  -6  -8  11   49.30   10.10
  -7   8  11  143.99   19.30
  -7  -8  11  165.08   17.50
   0  -9 -11  372.86   16.90
   0   9  11  378.36   18.00
   0  -9  11  302.97   17.80
  -1   9  11  126.69   10.20
  -1  -9  11  121.99    9.30
  -2   9  11  267.47   16.90
  -2  -9  11  267.67   15.90
  -3   9  11   47.00    8.70
  -3  -9  11   49.20    7.70
  -4   9  11  165.28   16.20
  -4  -9  11  177.88   14.20
  -5   9  11  171.58   16.40
  -5  -9  11  156.68   14.70
  -6   9  11   59.39   12.10
  -6  -9  11   54.69   10.30
  -7   9  11   51.29   12.40
  -7  -9  11   59.29   12.50
   0 -10  11  177.38   11.10
   0 -10 -11  157.28    9.40
  -1 -10 -11   68.29    3.80
  -1  10  11   80.89    8.40
  -1 -10  11   74.39    7.50
  -2  10  11  448.56   24.70
  -2 -10  11  458.75   23.60
  -3  10  11  220.88   17.20
  -3 -10  11  251.77   15.80
  -4  10  11  126.69   14.70
  -4 -10  11  133.79   12.70
  -5  10  11   83.69   13.60
  -5 -10  11   78.79   10.70
  -6  10  11   -0.80    8.60
  -6 -10  11    6.10    8.00
  -7  10  11   70.29   15.30
  -7 -10  11   83.09   13.00
   0 -11  11 1466.85   65.29
   0 -11 -11 1471.75   63.59
  -1 -11  11  431.06   22.40
  -2 -11  11  529.95   26.80
  -3  11  11   90.79   11.50
  -3 -11  11   79.99    9.40
  -4  11  11   11.30    8.40
  -4 -11  11   28.20    7.60
  -5  11  11    0.90    8.40
  -5 -11  11   11.80    7.30
  -6  11  11  100.79   14.80
  -6 -11  11  112.09   13.60
   7  11  11  112.69   26.00
   0 -12  11  530.75   26.30
   0 -12 -11  519.05   24.60
  -1 -12  11   58.59    7.50
  -2 -12  11  575.04   28.90
  -3 -12  11  186.08   14.20
  -4 -12  11  180.48   14.90
  -5 -12  11   40.90    8.90
  -6 -12  11  204.78   17.90
   0 -13  11   20.50    5.50
  -1 -13  11   23.20    5.80
  -2 -13  11  216.68   14.80
  -3 -13  11   38.30    7.50
  -4 -13  11  186.78   15.30
  -5 -13  11   65.19   10.50
  -6 -13  11   89.19   12.50
   0 -14  11   10.70    5.50
  -1 -14  11   91.59    9.50
  -2 -14  11  145.39   12.50
  -3 -14  11  175.98   14.30
  -4 -14  11   55.09    9.00
  -5 -14  11    5.50    7.60
   0 -15  11  248.58   16.30
  -1 -15  11  144.29   12.40
  -2 -15  11   24.00    7.20
  -3 -15  11   19.90    7.10
  -4 -15  11   38.70    8.70
  -5 -15  11   22.80    8.50
   0 -16  11   94.39   10.40
  -1 -16  11   88.59   10.20
  -2 -16  11  124.09   12.10
  -3 -16  11   35.70    8.10
  -4 -16  11   49.20    9.70
   0 -17  11   22.70    6.70
  -1 -17  11   69.69    9.40
  -2 -17  11   63.69    9.10
  -3 -17  11   16.80    7.30
   0 -18  11   66.89    9.60
  -1 -18  11   92.99   10.80
  -2 -18  11   34.90    8.50
   0 -19  11  104.89   12.20
   0   0  12  255.57   13.40
  -1   0  12 1010.50   44.50
   1   0  12  969.00   43.30
  -2   0  12 1064.39   48.40
  -3   0  12   17.00    5.40
  -4   0  12   18.40    6.70
  -5   0  12  128.69   12.20
  -6   0  12    5.10    7.10
  -7   0  12  101.29   14.10
  -8   0  12  161.38   18.80
   0   1  12  191.48   11.10
   0  -1  12  201.48   11.20
  -1   1  12  176.98   11.30
   1  -1  12  171.78   10.00
  -1  -1  12  180.28   11.30
   1   1  12  198.18   10.00
  -2   1  12  481.05   24.20
   2   1  12  483.75   22.20
  -2  -1  12  500.25   24.50
  -3   1  12  506.65   26.50
  -3  -1  12  536.95   26.80
  -5   1  12  590.94   31.20
  -5  -1  12  562.84   30.30
  -6   1  12  275.17   19.40
  -6  -1  12  255.47   19.20
  -7   1  12   39.00   10.00
  -7  -1  12   45.30   11.20
  -8   1  12  143.49   18.60
  -8  -1  12  112.99   16.10
   0  -2  12   24.70    4.00
   0  -2 -12   20.50    3.20
   0   2  12   24.60    4.00
   1  -2  12  402.06   19.40
  -1   2  12  394.46   20.30
   1   2  12  426.96   19.10
  -1  -2  12  402.76   20.40
  -2   2  12  323.97   18.30
   2   2  12  347.77   15.90
  -2  -2  12  336.77   18.10
  -3   2  12  545.85   27.10
  -3  -2  12  509.85   26.50
  -4   2  12   88.59   10.50
  -5   2  12   22.20    8.30
  -5  -2  12   22.80    7.50
  -6   2  12   22.60    8.60
  -6  -2  12   22.80    8.20
  -7   2  12   57.89   11.80
  -7  -2  12   39.30   11.00
  -8   2  12   87.29   15.40
  -8  -2  12   79.69   13.90
   0   3  12  666.83   30.80
   0  -3 -12  674.53   30.10
   0  -3  12  688.13   31.00
  -1   3  12  967.90   43.90
   1  -3  12 1004.10   43.20
  -1  -3  12  943.41   43.70
   1   3  12  974.50   42.50
  -2   3  12  354.06   18.90
  -2  -3  12  356.36   19.00
   2   3  12  347.57   16.30
  -3   3  12   79.89    9.40
  -4   3  12  141.99   12.40
   4   3  12  118.19    8.80
  -5   3  12  278.37   19.00
  -5  -3  12  256.27   18.00
  -6   3  12  105.49   14.10
  -6  -3  12   94.69   13.10
  -7   3  12   85.49   14.10
  -7  -3  12   65.09   12.50
  -8   3  12  227.88   23.00
  -8  -3  12  230.28   22.10
   0  -4  12   33.90    5.00
   0  -4 -12   31.30    3.60
   0   4  12   31.70    4.40
  -1   4  12  288.47   16.20
  -1  -4  12  322.87   16.50
   1   4  12  302.17   14.70
  -2   4  12  389.76   20.20
  -2  -4  12  359.66   19.20
   2   4  12  370.66   17.00
  -3   4  12  510.05   27.20
   3   4  12  529.05   23.10
  -4   4  12   33.60    8.30
  -4  -4  12   34.30    7.00
   4   4  12   34.70    4.70
  -5   4  12   18.80    7.90
   5   4  12   16.30    7.10
  -5  -4  12   21.80    7.80
  -6   4  12  377.46   25.20
  -6  -4  12  391.86   24.90
  -7   4  12  144.29   16.90
  -7  -4  12  170.58   17.10
  -8   4  12  114.29   16.00
  -8  -4  12  101.99   15.50
   0  -5  12   20.90    4.40
   0   5  12   11.80    3.70
   0  -5 -12   13.70    2.90
  -1   5  12   53.09    6.50
   1   5  12   59.99    5.20
  -1  -5  12   47.10    5.70
  -2   5  12  379.96   20.50
   2   5  12  375.26   17.10
  -3   5  12   57.89    8.60
   3   5  12   60.29    4.10
  -4   5  12  487.15   27.20
   4   5  12  470.05   22.40
  -4  -5  12  504.95   26.40
  -5   5  12   42.70   10.00
  -5  -5  12   67.29   10.30
  -6   5  12  102.79   14.10
  -6  -5  12  147.79   15.00
  -7   5  12   14.10   11.30
  -7  -5  12    3.20    8.60
  -8   5  12   61.59   13.70
  -8  -5  12   80.99   14.10
   0  -6 -12    6.10    2.60
   0  -6  12    7.40    3.50
   0   6  12    7.70    3.70
  -1   6  12    2.80    4.20
   1   6  12   11.30    2.90
  -2   6  12  236.48   15.20
   2   6  12  248.38   11.50
  -3   6  12  351.16   19.80
  -3  -6  12  334.97   18.90
   3   6  12  294.37   14.40
   3   6  12  334.07   14.30
  -4   6  12  226.88   17.30
   4   6  12  234.78   10.50
  -4  -6  12  243.98   16.40
   4   6  12  211.38   10.90
  -5   6  12    6.20    8.40
  -5  -6  12    2.40    7.10
  -6   6  12  118.39   15.10
  -6  -6  12  119.79   13.60
  -7   6  12   90.49   14.70
  -7  -6  12  113.39   15.10
   0  -7 -12    3.30    2.40
   0   7  12    7.60    3.60
  -1   7  12  408.26   21.20
   1   7  12  418.56   19.20
  -2   7  12   21.20    6.10
  -2  -7  12   37.10    6.20
  -3   7  12  292.97   18.50
  -3  -7  12  281.27   17.40
  -4   7  12  196.88   16.50
  -4  -7  12  190.18   14.90
  -5   7  12   84.69   12.00
  -5  -7  12   87.79   11.10
  -6   7  12    4.30    9.60
  -6  -7  12    4.40    7.80
  -7   7  12   68.59   14.50
  -7  -7  12   54.89   11.60
   0   8  12   40.40    5.20
   0  -8 -12   42.20    4.20
  -1   8  12    3.80    4.40
   1   8  12    5.40    2.60
  -1  -8  12    0.80    2.90
  -2   8  12   84.59    9.10
  -2  -8  12   76.59    8.20
  -3   8  12  410.36   23.60
  -3  -8  12  407.46   22.20
  -4   8  12  280.07   19.90
  -4  -8  12  288.77   18.10
  -5   8  12  322.77   22.90
  -5  -8  12  308.37   20.70
  -6   8  12  132.29   16.50
  -6  -8  12  125.59   14.80
  -7   8  12   11.30   10.40
  -7  -8  12    6.50    9.00
   0   9  12    2.50    3.90
   0  -9 -12    7.40    2.70
   0  -9  12   -2.70    1.90
  -1   9  12  976.60   44.30
  -1  -9  12  945.01   43.90
  -2   9  12  465.95   25.50
  -2  -9  12  500.75   25.00
  -3   9  12   58.89    9.30
  -3  -9  12   92.29   10.00
  -4   9  12  588.34   31.60
  -4  -9  12  562.44   30.20
  -5   9  12   46.40   11.30
  -5  -9  12   49.80    9.80
  -6   9  12  228.58   21.20
  -6  -9  12  179.98   17.70
  -7   9  12   52.39   13.00
  -7  -9  12   58.09   12.20
   0 -10  12 1474.85   65.59
   0 -10 -12 1478.15   63.79
  -1  10  12   80.99    8.50
  -1 -10  12   85.89    8.60
  -2  10  12   76.49    9.50
  -2 -10  12   88.09    9.30
  -3  10  12  345.37   21.10
  -3 -10  12  305.47   19.30
  -4  10  12  -12.00    6.70
  -4 -10  12    0.80    5.90
  -5  10  12    1.80    7.80
  -5 -10  12   -4.30    7.00
  -6  10  12  139.79   17.40
  -6 -10  12  115.09   14.10
  -7  10  12    0.30   10.70
  -7 -10  12    8.20    9.30
   0 -11 -12    0.40    2.90
   0 -11  12   10.40    4.90
  -1 -11  12   69.99    8.10
  -2  11  12  140.59   13.40
  -2 -11  12  173.68   12.80
  -3  11  12   58.29   10.00
  -3 -11  12   86.59   10.10
  -4  11  12  133.39   14.40
  -4 -11  12  119.59   12.30
  -5  11  12   44.40   11.60
  -5 -11  12   40.50    9.60
  -6  11  12    7.00   10.00
  -6 -11  12    3.50    8.10
   0 -12  12   19.70    5.70
  -1 -12  12    0.60    5.00
  -2 -12  12   30.10    6.40
  -3 -12  12  278.37   18.10
  -4 -12  12    7.30    6.80
  -5 -12  12   69.99   11.30
  -6 -12  12  110.49   14.10
   0 -13  12    0.30    4.90
  -1 -13  12   71.99    8.80
  -2 -13  12  177.68   13.80
  -3 -13  12  200.38   15.30
  -4 -13  12   18.80    7.90
  -5 -13  12  127.39   14.00
  -6 -13  12   61.59   11.50
   0 -14  12  212.08   14.70
  -1 -14  12   82.79    9.70
  -2 -14  12   74.79    9.70
  -3 -14  12  215.98   16.20
  -4 -14  12   27.30    7.80
  -5 -14  12   68.19   10.90
   0 -15  12  311.27   18.50
  -1 -15  12   28.90    7.20
  -2 -15  12  136.79   13.00
  -3 -15  12  -12.20    6.00
  -4 -15  12   17.80    7.90
   0 -16  12  119.49   12.10
  -1 -16  12   38.00    7.90
  -2 -16  12  141.39   13.50
  -3 -16  12   21.30    7.90
  -4 -16  12    9.70    7.90
   0 -17  12    2.80    6.50
  -1 -17  12   53.39    9.00
  -2 -17  12  152.48   14.40
  -3 -17  12  114.39   13.10
   0 -18  12   84.59   10.40
  -1 -18  12   22.90    8.10
  -2 -18  12   11.80    7.30
  -1   0  13   97.49    8.50
   1   0  13  104.39    7.40
  -2   0  13  948.31   43.80
  -3   0  13  195.08   14.10
  -4   0  13   11.90    6.90
  -5   0  13  627.84   33.00
  -6   0  13   -8.40    6.70
  -7   0  13   -2.40    7.60
  -8   0  13   67.59   14.00
   0  -1  13   53.69    5.70
   0   1  13   56.09    5.80
   1  -1  13 1444.56   62.89
  -1   1  13 1428.16   63.79
   1   1  13 1461.05   62.69
  -1  -1  13 1456.65   63.89
  -2   1  13  103.29   10.00
  -2  -1  13  120.89   10.10
   2   1  13  118.89    7.30
  -3   1  13   11.70    5.50
  -3  -1  13    7.70    5.00
  -4   1  13   27.20    7.40
  -4  -1  13   34.50    7.40
  -5   1  13  173.88   16.00
  -5  -1  13  171.78   14.30
  -6   1  13   86.19   11.70
  -6  -1  13   76.29   11.60
  -7   1  13    9.40    8.60
  -7  -1  13    2.10    9.10
  -8   1  13   90.39   15.60
  -8  -1  13   92.99   15.00
   0   2  13  195.98   11.10
   0  -2  13  186.98   11.30
  -1   2  13   34.50    5.60
   1  -2  13   21.20    3.90
  -1  -2  13   23.80    4.70
   1   2  13   22.70    3.80
  -2   2  13  138.89   10.70
  -2  -2  13  159.38   10.90
   2   2  13  145.89    8.30
  -3   2  13  208.08   14.00
  -3  -2  13  187.98   13.30
  -5   2  13  448.06   26.90
  -5  -2  13  462.25   26.20
  -6   2  13   60.99   11.40
  -6  -2  13   44.70   10.00
  -7   2  13  137.99   16.20
  -7  -2  13  131.09   16.40
  -8   2  13   34.50   11.90
  -8  -2  13   -3.00    9.30
   0  -3 -13  390.76   18.30
   0   3  13  345.97   18.30
   0  -3  13  383.36   18.80
  -1   3  13   49.20    6.10
   1  -3  13   43.30    5.00
   1   3  13   49.99    4.80
  -1  -3  13   52.69    6.00
  -2   3  13  261.27   15.80
   2   3  13  254.27   12.80
  -2  -3  13  271.47   15.40
  -3   3  13  124.09   11.80
  -4   3  13  395.16   23.40
  -5   3  13  276.57   19.60
  -5  -3  13  224.58   17.60
  -6   3  13  183.18   18.00
  -6  -3  13  172.18   16.70
  -7   3  13   84.49   14.30
  -7  -3  13   47.10   11.80
  -8   3  13  281.67   24.10
  -8  -3  13  261.47   23.50
   0  -4 -13  544.55   24.50
   0  -4  13  551.64   25.60
   0   4  13  519.65   25.30
   1  -4  13  204.78   11.90
  -1   4  13  203.68   12.90
  -1  -4  13  214.58   13.10
   1   4  13  234.78   11.50
  -2   4  13  241.28   14.70
   2   4  13  236.18   11.30
  -2  -4  13  196.78   13.30
  -3   4  13  577.54   28.90
   3   4  13  535.55   24.40
  -4   4  13  164.28   14.30
   4   4  13  133.29    9.10
  -4  -4  13  142.59   12.60
  -5   4  13  449.36   26.20
  -5  -4  13  433.96   25.40
  -6   4  13   99.29   13.40
  -6  -4  13   85.59   12.50
  -7   4  13   55.29   12.40
  -7  -4  13   75.39   12.70
  -8   4  13   29.80   11.40
  -8  -4  13   11.40   10.10
   0   5  13   63.09    6.10
   0  -5 -13   68.99    5.40
   0  -5  13   53.29    6.00
  -1   5  13  590.94   28.10
  -1  -5  13  590.14   27.90
   1   5  13  562.24   26.30
  -2   5  13  100.09    9.90
   2   5  13  118.69    6.80
  -3   5  13  104.09   10.80
   3   5  13  111.39    6.30
  -4   5  13  741.33   37.00
  -4  -5  13  750.12   36.70
   4   5  13  706.83   32.70
  -5   5  13   14.00    7.80
  -5  -5  13   22.00    7.60
  -6   5  13  161.18   17.00
  -6  -5  13  162.08   15.60
  -7   5  13  126.59   17.80
  -7  -5  13  142.69   16.90
   0   6  13   66.19    6.40
   0  -6 -13   60.99    5.30
   0  -6  13   71.89    7.10
  -1   6  13  104.19    9.10
   1   6  13  102.39    7.10
  -2   6  13  251.87   16.20
   2   6  13  269.37   12.60
  -3   6  13   30.60    7.80
  -3  -6  13   31.60    6.40
   3   6  13   30.10    3.20
   3   6  13   39.20    3.20
  -4   6  13   96.79   11.40
   4   6  13  102.49    5.50
  -4  -6  13   95.09   11.10
   4   6  13   96.89    6.10
  -5   6  13  112.39   13.80
  -5  -6  13  107.09   12.10
  -6   6  13   26.30   10.80
  -6  -6  13   23.10    9.00
  -7   6  13   67.79   13.40
  -7  -6  13   76.69   13.20
   0   7  13  626.84   29.30
   0  -7 -13  632.34   28.30
  -1   7  13  366.66   19.40
   1   7  13  363.06   17.40
  -2   7  13  755.12   37.60
   2   7  13  808.32   34.00
  -3   7  13  228.58   16.70
  -3  -7  13  251.37   15.80
  -4   7  13  168.18   16.10
  -4  -7  13  200.88   15.30
  -5   7  13  141.59   15.80
  -5  -7  13  150.78   14.60
  -6   7  13   21.80   10.60
  -6  -7  13   30.00    9.70
  -7   7  13   20.10   11.40
  -7  -7  13   17.80   10.00
   0   8  13 2431.86  106.19
   0  -8 -13 2504.35  105.29
  -1   8  13  156.18   11.60
   1   8  13  165.68    9.20
  -2   8  13  132.99   12.30
  -2  -8  13  145.49   11.60
  -3   8  13   71.49   10.20
  -3  -8  13   89.59    9.90
  -4   8  13   37.00    9.30
  -4  -8  13   33.10    7.80
  -5   8  13   58.09   11.00
  -5  -8  13   51.59   10.00
  -6   8  13   20.50   10.50
  -6  -8  13   19.40    9.00
  -7   8  13   54.79   13.40
  -7  -8  13   48.60   11.20
   0   9  13  134.49    9.90
   0  -9 -13  142.89    8.40
  -1   9  13  186.68   13.00
  -1  -9  13  193.78   13.00
  -2   9  13   81.89    9.80
  -2  -9  13   81.99    8.80
  -3   9  13  178.98   16.00
  -3  -9  13  207.68   14.30
  -4   9  13  446.56   27.30
  -4  -9  13  458.35   25.90
  -5   9  13   38.70   10.90
  -5  -9  13   27.00    8.80
  -6   9  13  112.39   16.40
  -6  -9  13  115.79   14.10
  -7   9  13   84.19   15.50
  -7  -9  13   71.79   12.70
   0  10  13  745.03   34.80
   0 -10 -13  757.92   33.60
   0 -10  13  761.42   35.60
  -1  10  13  371.46   20.30
  -1 -10  13  362.96   20.20
  -2  10  13   42.70    8.00
  -2 -10  13   58.39    7.60
  -3  10  13  168.08   15.00
  -3 -10  13  163.98   13.80
  -4  10  13  351.66   23.30
  -4 -10  13  338.27   21.50
  -5  10  13   36.40   11.00
  -5 -10  13   49.60   10.00
  -6  10  13   52.79   13.00
  -6 -10  13   54.39   11.40
   0 -11  13   80.29    8.30
  -1  11  13  157.28   12.90
  -1 -11  13  218.68   13.30
  -2  11  13  242.88   16.80
  -2 -11  13  230.18   15.70
  -3  11  13   92.39   11.80
  -3 -11  13   86.69   10.10
  -4  11  13   57.69   11.40
  -4 -11  13   59.69    9.50
  -5  11  13  120.39   15.30
  -5 -11  13  136.99   14.10
  -6  11  13   28.70   11.80
  -6 -11  13   15.70    9.40
   0 -12  13   -4.50    4.20
  -1 -12  13  121.69   11.20
  -2 -12  13  136.89   12.40
  -3  12  13   57.89   10.20
  -3 -12  13   53.89    8.60
  -4  12  13  109.09   14.00
  -4 -12  13  151.98   14.30
  -5  12  13   84.59   14.00
  -5 -12  13   82.89   12.00
  -6 -12  13   41.40   10.60
   0 -13  13   12.20    5.30
  -1 -13  13    3.60    5.60
  -2 -13  13   25.00    7.30
  -3 -13  13  274.87   18.50
  -4 -13  13  357.36   22.70
  -5 -13  13   18.30    8.90
   0 -14  13   11.30    5.70
  -1 -14  13  211.98   15.20
  -2 -14  13   64.69    9.20
  -3 -14  13   42.70    8.70
  -4 -14  13   23.50    8.50
  -5 -14  13   30.10    8.90
   0 -15  13  153.28   13.40
  -1 -15  13   29.00    7.70
  -2 -15  13    6.70    6.10
  -3 -15  13    5.40    6.80
  -4 -15  13   11.70    7.50
   0 -16  13   10.60    6.30
  -1 -16  13   28.90    7.60
  -2 -16  13   36.30    8.40
  -3 -16  13   50.89    9.40
   0 -17  13   91.29   11.40
  -1 -17  13   62.79    9.60
  -2 -17  13   75.89   11.00
   0 -18  13   13.90    7.40
   1 -18  13   -8.60    6.70
  -1 -18  13   -5.90    6.70
   0   0  14   27.80    4.40
   1   0  14   43.70    4.80
  -1   0  14   38.80    5.80
   2   0  14    5.30    2.80
  -2   0  14   -0.10    4.20
  -3   0  14   40.80    7.30
  -4   0  14  950.00   45.80
  -5   0  14   43.20    9.10
  -6   0  14   19.50    8.90
  -7   0  14   -0.10    7.90
  -8   0  14   50.79   12.60
   0  -1  14   -1.50    3.30
   0   1  14    6.40    3.60
  -1   1  14  186.38   12.20
   1  -1  14  203.08   11.20
   1   1  14  195.18   10.90
  -1  -1  14  187.48   12.30
  -2   1  14  137.09   10.70
  -2  -1  14  139.19   11.30
   2   1  14  141.29    8.50
  -3   1  14  142.09   12.90
  -3  -1  14  173.18   13.20
  -4   1  14   82.49   10.40
  -4  -1  14   70.49    9.50
  -5   1  14  247.98   19.00
  -5  -1  14  293.77   19.50
  -6   1  14  124.49   14.30
  -6  -1  14  140.29   15.60
  -7   1  14   24.60    9.70
  -7  -1  14   45.70   10.90
   0   2  14   85.39    7.50
   0  -2  14   76.99    7.00
  -1   2  14  242.78   14.10
   1  -2  14  214.58   12.80
  -1  -2  14  264.57   14.10
   1   2  14  236.98   12.60
  -2   2  14  107.09   10.10
   2   2  14  107.89    6.90
  -2  -2  14   90.39    9.10
  -3   2  14  216.08   15.80
  -3  -2  14  244.18   15.90
  -4   2  14  322.87   20.30
  -4  -2  14  298.97   18.90
  -5   2  14  213.48   17.80
  -5  -2  14  193.58   15.60
  -6   2  14   45.20   11.00
  -6  -2  14   34.40    9.30
  -7   2  14   72.59   13.10
  -7  -2  14   47.10   11.80
   0   3  14 2206.08   93.79
   0  -3  14 2137.89   93.89
  -1   3  14   93.69    8.60
   1  -3  14   92.79    7.50
   1   3  14   84.89    6.80
  -1  -3  14   93.59    8.20
  -2   3  14   48.30    6.90
  -2  -3  14   46.20    6.90
   2   3  14   50.49    4.80
  -3   3  14   21.60    6.70
   3   3  14   14.60    2.90
  -3  -3  14    1.00    3.70
  -4   3  14    9.20    7.10
  -4  -3  14   16.80    6.30
  -5   3  14   47.20    9.90
  -5  -3  14   50.79    9.40
  -6   3  14  244.98   21.00
  -6  -3  14  257.17   19.60
  -7   3  14  358.76   25.90
  -7  -3  14  320.07   23.80
   0  -4  14   37.40    5.50
   0   4  14   32.50    4.90
  -1   4  14  929.41   42.10
   1  -4  14  899.61   41.30
  -1  -4  14  924.31   42.20
   1   4  14  918.31   40.70
  -2   4  14  245.08   15.30
   2   4  14  237.28   12.00
  -2  -4  14  222.98   14.70
  -3   4  14   81.99   10.10
   3   4  14   78.29    5.60
  -4   4  14  125.69   12.80
  -4  -4  14   94.89   10.50
  -5   4  14  116.09   13.80
  -5  -4  14  140.89   14.70
  -6   4  14   67.89   11.90
  -6  -4  14   79.59   11.90
  -7   4  14   23.00   10.50
  -7  -4  14   26.00   11.10
   0  -5 -14  211.48   11.40
   0  -5  14  201.08   12.20
   0   5  14  203.88   12.10
  -1   5  14   11.90    4.90
   1  -5  14   12.20    4.10
   1   5  14   12.10    3.30
  -1  -5  14   16.70    4.70
  -2   5  14  123.49   11.50
   2   5  14  135.39    7.80
  -3   5  14  705.43   35.60
   3   5  14  711.73   31.10
  -4   5  14    3.90    6.50
   4   5  14   10.40    2.50
   4   5  14   11.10    3.20
  -4  -5  14    5.00    5.80
  -5   5  14   35.40    9.10
  -5  -5  14   44.70    9.90
  -6   5  14   20.20   10.00
  -6  -5  14   24.70    9.40
  -7   5  14   62.39   14.00
  -7  -5  14   63.99   13.10
   0  -6 -14   86.29    6.40
   0   6  14   81.59    8.00
   0  -6  14  105.69    8.60
  -1   6  14   41.20    6.30
   1  -6  14   49.40    6.20
   1   6  14   52.19    5.10
  -2   6  14   81.79    9.00
   2   6  14   66.29    5.30
  -3   6  14  186.28   14.60
  -3  -6  14  188.58   13.30
   3   6  14  180.78    9.10
  -4   6  14  129.19   13.90
  -4  -6  14  139.19   12.80
   4   6  14  134.69    7.10
  -5   6  14    1.60    7.70
  -5  -6  14    9.40    7.90
  -6   6  14   23.80   10.80
  -6  -6  14   21.90    9.70
  -7   6  14   92.99   15.20
  -7  -6  14  115.89   15.00
   0   7  14   99.89    8.60
   0  -7 -14  104.99    7.00
  -1   7  14   38.70    6.30
   1   7  14   29.50    4.30
  -2   7  14  109.59   10.70
   2   7  14  104.39    6.40
  -3   7  14  318.47   20.30
  -3  -7  14  331.97   19.70
  -4   7  14   61.79   10.60
  -4  -7  14   49.40    9.30
  -5   7  14   32.10   10.00
  -5  -7  14   31.10    8.40
  -6   7  14   20.40   10.40
  -6  -7  14   14.90    8.90
  -7   7  14  189.48   21.10
  -7  -7  14  169.28   18.80
   0   8  14  116.49    9.10
   0  -8 -14  114.09    7.40
  -1   8  14  205.18   13.70
   1   8  14  212.98   11.40
  -2   8  14  341.07   20.50
  -2  -8  14  362.26   19.80
  -3   8  14   20.90    7.40
  -3  -8  14   18.20    6.90
  -4   8  14  547.85   30.70
  -4  -8  14  537.75   29.50
  -5   8  14    4.30    8.50
  -5  -8  14   13.40    8.20
  -6   8  14    8.90   11.00
  -6  -8  14   18.80    9.90
  -7   8  14    7.00   11.20
  -7  -8  14   14.50   10.10
   0  -9 -14  173.08   10.00
   0  -9  14  200.38   12.30
   0   9  14  181.98   11.70
  -1   9  14   47.60    7.20
   1   9  14   46.80    4.80
  -1  -9  14   53.79    7.30
  -2   9  14  620.64   31.10
  -2  -9  14  597.74   30.30
  -3   9  14  410.16   24.10
  -3  -9  14  403.36   23.20
  -4   9  14  267.37   20.20
  -4  -9  14  280.17   19.20
  -5   9  14   21.60    9.60
  -5  -9  14   48.20    9.50
  -6   9  14   82.79   14.80
  -6  -9  14   80.59   13.30
   0 -10  14  125.39    9.70
   0  10  14  115.59    9.40
   0 -10 -14  117.09    7.90
  -1  10  14  409.06   21.40
  -1 -10  14  376.56   21.30
  -2  10  14  338.47   20.70
  -2 -10  14  346.37   19.70
  -3  10  14   -2.40    6.80
  -3 -10  14   12.10    6.60
  -4  10  14  121.59   14.50
  -4 -10  14  156.68   14.60
  -5  10  14   22.30   10.50
  -5 -10  14   16.90    8.20
  -6  10  14   29.30   11.40
  -6 -10  14   14.30    9.30
   0 -11  14   40.80    6.90
  -1  11  14  116.59   11.20
  -1 -11  14  122.89   10.70
  -2  11  14   63.39    9.50
  -2 -11  14   50.59    8.10
  -3  11  14   41.90    9.40
  -3 -11  14   33.40    8.20
  -4  11  14   13.70    8.50
  -4 -11  14    4.40    7.30
  -5  11  14   79.29   13.10
  -5 -11  14   81.19   11.60
  -6  11  14   35.00   12.20
  -6 -11  14   21.70    9.70
   0 -12  14   13.30    5.80
  -1 -12  14   60.59    8.40
  -2  12  14    5.90    5.90
  -2 -12  14    6.80    6.20
  -3  12  14   82.89   11.80
  -3 -12  14  120.79   12.20
  -4  12  14   18.50    9.10
  -4 -12  14   35.70    9.30
  -5  12  14   48.00   11.90
  -5 -12  14   28.30    9.10
   0 -13  14  233.48   15.70
  -1 -13  14   30.10    7.40
  -2 -13  14  149.69   13.60
  -3 -13  14   20.60    7.30
  -4 -13  14   31.20    8.70
  -5 -13  14   59.39   11.40
   0 -14  14  142.09   13.00
  -1 -14  14   27.90    7.70
  -2 -14  14   21.00    7.00
  -3 -14  14  127.99   13.50
  -4 -14  14    5.60    7.70
   0 -15  14  196.18   15.20
  -1 -15  14   58.19    9.40
  -2 -15  14   13.90    6.90
  -3 -15  14   18.40    8.20
  -4 -15  14   57.19   10.10
   0 -16  14    8.50    6.80
   1 -16  14  264.87   18.10
  -1 -16  14  285.47   18.90
  -2 -16  14   75.79   10.50
  -3 -16  14   34.50    9.20
   0 -17  14    3.80    7.20
   1 -17  14   70.59   10.40
  -1 -17  14   53.79    9.70
  -2 -17  14   95.19   11.80
   0   0  15    7.30    3.90
   1   0  15  223.68   12.60
  -1   0  15  240.28   14.20
  -2   0  15    1.10    4.40
   2   0  15    5.80    3.10
  -3   0  15  137.79   12.60
  -4   0  15   48.20    9.30
  -5   0  15   75.69   11.90
  -6   0  15   63.39   11.30
  -7   0  15    5.90    9.00
   0   1  15  647.64   30.50
   0  -1  15  660.63   30.70
  -1   1  15  237.28   14.10
   1  -1  15  234.08   12.90
  -1  -1  15  229.38   13.80
   1   1  15  227.08   12.70
  -2   1  15  109.19   10.40
   2  -1  15  109.29    8.00
   2   1  15  105.89    7.50
  -2  -1  15  111.69   10.40
  -3   1  15    5.90    5.60
  -3  -1  15   -4.70    5.50
  -4   1  15   69.59   10.50
  -4  -1  15   76.59   10.90
  -5   1  15  502.65   28.80
  -5  -1  15  502.15   28.40
  -6   1  15   81.79   13.30
  -6  -1  15   97.49   13.40
  -7   1  15   57.59   13.00
  -7  -1  15   61.69   12.20
   0   2  15    2.80    3.70
   0  -2  15    7.70    4.00
   1  -2  15  126.59    9.00
  -1   2  15  132.29   10.30
   1   2  15  133.29    8.80
  -1  -2  15  126.49   10.30
   2  -2  15   22.00    4.30
  -2   2  15   13.60    5.40
  -2  -2  15   18.90    5.80
   2   2  15   18.60    3.60
  -3   2  15  100.89   11.10
   3   2  15   97.99    7.10
  -3  -2  15  115.89   11.50
  -4   2  15  374.56   22.90
  -4  -2  15  356.26   21.70
  -5   2  15   76.19   11.40
  -5  -2  15  109.99   12.60
  -6   2  15  311.77   23.10
  -6  -2  15  360.06   23.90
  -7   2  15   -3.50    9.60
  -7  -2  15   15.00   10.10
   0  -3  15   34.30    5.30
   0   3  15   27.70    4.90
  -1   3  15   19.90    5.10
   1  -3  15   26.40    4.90
  -1  -3  15   36.20    5.70
   1   3  15   28.40    4.40
  -2   3  15  176.78   12.80
   2   3  15  168.38    9.70
  -2  -3  15  157.48   12.50
  -3   3  15  100.39   11.10
   3   3  15   92.09    6.50
  -3  -3  15   88.89    9.90
  -4   3  15  492.55   26.90
  -4  -3  15  458.95   26.30
  -5   3  15  307.57   20.50
  -5  -3  15  257.67   19.00
  -6   3  15  306.37   23.40
  -6  -3  15  300.57   22.50
  -7   3  15   18.80   10.30
  -7  -3  15    3.50   10.00
   0   4  15   29.20    5.10
   0  -4  15   42.80    5.90
  -1   4  15  284.17   16.40
   1  -4  15  305.67   15.70
   1   4  15  272.97   14.80
  -1  -4  15  294.87   16.60
  -2   4  15  258.77   16.70
  -2  -4  15  285.47   16.60
   2   4  15  281.57   13.90
  -3   4  15  164.68   13.80
   3   4  15  140.99    8.40
  -3  -4  15  146.69   12.50
  -4   4  15   62.19   10.20
  -4  -4  15   54.19    8.70
   4   4  15   48.30    4.60
  -5   4  15  173.28   15.70
  -5  -4  15  126.89   13.70
  -6   4  15   22.10    9.70
  -6  -4  15   10.60    9.20
  -7   4  15   -4.90    9.20
  -7  -4  15   -6.70    9.00
   0  -5  15  287.47   15.90
   0   5  15  272.97   15.30
   1  -5  15   68.69    7.00
  -1   5  15   73.29    8.10
  -1  -5  15   85.79    8.40
   1   5  15   74.89    6.70
  -2   5  15    8.10    5.20
   2   5  15    3.10    2.70
  -2  -5  15    8.00    4.70
  -3   5  15  457.05   24.90
   3   5  15  431.76   20.00
  -3  -5  15  425.56   23.80
  -4   5  15   15.30    7.20
  -4  -5  15   24.00    7.00
   4   5  15   20.00    3.10
  -5   5  15   52.19   10.60
  -5  -5  15   68.39   10.70
  -6   5  15   60.69   11.90
  -6  -5  15   58.99   11.60
  -7   5  15   26.10   11.60
  -7  -5  15   21.80   10.30
   0   6  15   97.79    8.20
   0  -6  15   61.09    7.10
   1  -6  15   37.10    5.90
  -1   6  15   48.10    6.90
  -1  -6  15   48.10    7.10
   1   6  15   47.80    5.20
  -2   6  15   87.09    9.50
   2   6  15   83.59    6.30
  -3   6  15  116.99   12.00
  -3  -6  15  121.69   11.50
   3   6  15  125.19    7.00
  -4   6  15  133.89   14.30
   4   6  15  126.09    7.10
  -4  -6  15  141.39   13.10
  -5   6  15   42.40   10.50
  -5  -6  15   51.59   10.50
  -6   6  15  183.18   19.10
  -6  -6  15  188.18   18.20
  -7   6  15   32.10   11.70
  -7  -6  15   72.49   13.90
   0   7  15   48.20    6.10
   0  -7  15   63.39    7.20
   0  -7 -15   43.50    6.20
   1  -7  15  200.48   12.40
  -1   7  15  208.68   13.20
  -1  -7  15  135.09   11.20
   1   7  15  193.58   10.80
  -2   7  15  477.45   26.00
  -2  -7  15  492.55   25.50
   2   7  15  496.05   22.30
  -3   7  15  144.89   13.90
   3   7  15  152.58    7.30
  -3  -7  15  138.59   13.00
  -4   7  15   33.70    9.20
  -4  -7  15   28.30    8.50
  -5   7  15    8.50    8.70
  -5  -7  15   -0.90    7.30
  -6   7  15   21.10   11.00
  -6  -7  15   25.00   10.40
  -7   7  15   24.10   12.20
  -7  -7  15   26.50   10.80
   0  -8  15   52.69    6.80
   0   8  15   46.40    6.20
   0  -8 -15   41.70    4.70
   1  -8  15  131.99    9.80
  -1   8  15  115.59   10.40
  -1  -8  15  104.99    9.90
   1   8  15  113.49    8.10
  -2   8  15  104.39   10.90
   2   8  15   93.19    5.50
  -2  -8  15   80.49    8.90
  -3   8  15   53.69    9.30
  -3  -8  15   61.19    8.70
  -4   8  15   -5.20    7.00
  -4  -8  15    1.60    6.40
  -5   8  15   34.10    9.90
  -5  -8  15   27.40    9.40
  -6   8  15  163.38   18.80
  -6  -8  15  143.69   16.50
   0  -9  15  230.58   13.80
   0   9  15  226.38   13.30
   0  -9 -15  212.68   11.60
  -1   9  15  273.07   16.80
   1  -9  15  281.67   16.60
  -1  -9  15  288.87   16.80
   1   9  15  275.07   14.20
  -2   9  15  408.66   23.00
  -2  -9  15  395.16   22.10
  -3   9  15   13.40    6.90
  -3  -9  15   10.60    6.30
  -4   9  15   -3.20    6.90
  -4  -9  15   -1.10    6.80
  -5   9  15    0.00    8.50
  -5  -9  15    4.80    7.50
  -6   9  15   21.60   11.10
  -6  -9  15   -1.80    8.00
   0 -10  15  493.35   25.10
   0  10  15  484.85   24.10
   1 -10  15  254.07   15.50
  -1 -10  15  245.08   15.60
  -2  10  15   -4.70    5.90
  -2 -10  15    6.10    5.50
  -3  10  15  220.08   17.60
  -3 -10  15  250.97   17.40
  -4  10  15  200.08   18.10
  -4 -10  15  205.78   17.20
  -5  10  15   55.29   12.40
  -5 -10  15   42.40    9.90
  -6  10  15  137.49   18.20
  -6 -10  15  109.99   14.40
   0 -11  15   32.20    6.30
   1 -11  15  321.67   18.00
  -1 -11  15  296.07   18.60
  -2  11  15  268.47   18.20
  -2 -11  15  280.87   17.60
  -3  11  15  135.99   14.00
  -3 -11  15  128.49   12.70
  -4  11  15  106.09   13.90
  -4 -11  15  101.69   13.00
  -5  11  15   51.09   11.70
  -5 -11  15   59.79   10.60
   0 -12  15   32.10    6.60
   1 -12  15  176.08   12.90
  -1 -12  15  169.58   13.20
  -2  12  15  155.78   14.40
  -2 -12  15  184.08   14.60
  -3  12  15   27.20    8.30
  -3 -12  15    5.30    6.40
  -4  12  15   91.19   13.20
  -4 -12  15   73.19   11.30
  -5  12  15   77.89   13.90
  -5 -12  15   81.09   12.40
   0 -13  15  128.69   12.40
   1 -13  15  343.57   20.10
  -1 -13  15  325.77   20.40
  -2 -13  15  190.58   14.80
  -3 -13  15  134.79   14.10
  -4 -13  15    9.00    7.40
  -5 -13  15   -2.30    8.10
   0 -14  15   23.80    6.90
   1 -14  15  101.89   11.20
  -1 -14  15  108.39   11.80
  -2 -14  15  101.19   11.30
  -3 -14  15   13.30    7.70
  -4 -14  15   11.00    8.20
   0 -15  15   11.10    6.60
   1 -15  15   32.80    7.70
  -1 -15  15   33.10    8.10
  -2 -15  15   24.40    8.10
  -3 -15  15    0.80    7.00
   0 -16  15   -0.80    6.90
   1 -16  15   84.49   11.20
  -1 -16  15   64.69    9.90
  -2 -16  15   -7.20    6.90
   0 -17  15  192.38   15.60
   1 -17  15    7.60    7.80
  -1 -17  15    5.90    7.30
   0   0  16  247.88   14.30
   1   0  16   88.99    7.80
  -1   0  16   78.79    8.10
  -2   0  16    9.50    5.40
   2   0  16   20.70    4.00
  -3   0  16  496.45   26.90
  -4   0  16   14.60    7.10
  -5   0  16   -2.30    7.20
  -6   0  16   50.19   11.50
  -7   0  16   45.10   12.10
   0   1  16  235.38   13.90
   0  -1  16  250.67   14.10
   1  -1  16  290.07   15.20
  -1   1  16  269.77   16.10
  -1  -1  16  287.97   16.50
   1   1  16  280.27   15.10
   2  -1  16   74.89    6.80
  -2   1  16   52.49    8.00
  -2  -1  16   66.49    8.30
   2   1  16   68.49    6.50
  -3   1  16  146.89   13.40
   3   1  16  154.38    9.40
  -3  -1  16  138.99   13.30
  -4   1  16  335.37   21.70
  -4  -1  16  371.46   22.00
  -5   1  16   40.70   10.20
  -5  -1  16   14.80    8.70
  -6   1  16  140.19   16.30
  -6  -1  16  123.29   14.60
  -7   1  16   -1.90    8.70
  -7  -1  16   13.00   10.00
   0  -2  16  112.19    9.30
   0   2  16  116.49    9.30
   1  -2  16  118.39    9.20
  -1   2  16  125.89   10.50
   1   2  16  148.39    9.30
  -1  -2  16  122.99   10.70
   2  -2  16  103.49    8.10
  -2   2  16  109.59   10.60
   2   2  16   95.69    7.50
  -2  -2  16  101.09    9.90
  -3   2  16   44.80    8.40
   3   2  16   47.20    5.00
  -3  -2  16   56.49    9.00
  -4   2  16  264.67   18.40
  -4  -2  16  254.37   18.60
  -5   2  16  169.48   17.00
  -5  -2  16  173.88   15.40
  -6   2  16   -5.80    7.80
  -6  -2  16    3.80    7.70
  -7   2  16   51.29   12.40
  -7  -2  16   34.10   11.80
   0   3  16   13.70    4.10
   0  -3  16    4.70    4.00
  -1   3  16  117.89   10.50
   1  -3  16  132.89    9.50
   1   3  16  123.69    8.80
  -1  -3  16  117.69   10.00
   2  -3  16   52.19    5.90
  -2   3  16   36.30    7.10
  -2  -3  16   50.79    7.50
   2   3  16   45.10    5.00
  -3   3  16   69.79    9.70
   3   3  16   62.59    5.80
  -3  -3  16   57.49    8.60
  -4   3  16  159.48   15.10
   4   3  16  137.19    8.80
  -4  -3  16  156.18   13.60
  -5   3  16   43.70   10.10
  -5  -3  16   41.50    9.00
  -6   3  16   86.89   13.50
  -6  -3  16   58.79   11.40
  -7   3  16   12.50   10.00
  -7  -3  16   -0.50    9.10
   0  -4  16  403.86   20.90
   0   4  16  411.86   20.80
  -1   4  16   67.49    8.00
   1  -4  16   81.99    7.80
  -1  -4  16   92.59    9.10
   1   4  16   73.09    6.80
  -2   4  16  288.07   18.10
  -2  -4  16  303.67   17.80
   2   4  16  299.47   15.00
  -3   4  16  177.68   15.40
   3   4  16  199.88   10.60
  -3  -4  16  186.18   14.80
  -4   4  16  203.28   16.90
  -4  -4  16  168.98   14.40
   4   4  16  185.78   10.10
  -5   4  16  236.28   18.60
  -5  -4  16  221.98   17.50
  -6   4  16  107.69   15.30
  -6  -4  16  105.59   13.90
  -7   4  16   42.70   13.00
  -7  -4  16   26.20   10.20
   0   5  16  697.23   33.30
   0  -5  16  735.63   33.90
  -1   5  16  138.19   11.60
   1  -5  16  139.99   10.10
  -1  -5  16  159.98   11.80
   1   5  16  153.58    9.80
  -2   5  16  525.75   27.50
  -2  -5  16  527.35   27.20
   2   5  16  516.45   24.10
  -3   5  16   32.10    7.90
  -3  -5  16   28.20    7.10
   3   5  16   26.80    3.70
  -4   5  16  236.08   17.60
  -4  -5  16  207.48   16.30
   4   5  16  245.28   11.90
  -5   5  16   75.39   12.30
  -5  -5  16   86.39   12.00
  -6   5  16   47.10   11.40
  -6  -5  16   56.89   12.40
  -7   5  16   87.09   15.20
  -7  -5  16  118.79   16.70
   0  -6  16  110.69   10.00
   0   6  16  109.99    9.30
   1  -6  16   70.69    7.60
  -1   6  16   69.89    8.30
  -1  -6  16   58.19    7.90
   1   6  16   60.29    6.00
  -2   6  16  195.28   14.60
   2   6  16  180.08   10.30
  -2  -6  16  181.58   13.10
  -3   6  16  311.87   20.70
   3   6  16  338.67   15.70
  -3  -6  16  335.07   20.20
  -4   6  16    2.00    7.10
  -4  -6  16    3.00    5.90
   4   6  16    1.60    2.30
  -5   6  16   40.00   10.50
  -5  -6  16   42.70   10.00
  -6   6  16    8.60    9.40
  -6  -6  16    9.00    9.10
  -7   6  16  143.39   18.60
  -7  -6  16  120.89   16.20
   0   7  16  410.16   20.90
   0  -7  16  401.76   21.50
  -1   7  16  296.67   17.70
   1  -7  16  295.87   17.10
  -1  -7  16  298.27   17.40
   1   7  16  309.67   15.70
  -2   7  16   15.80    6.30
  -2  -7  16   12.80    5.20
   2   7  16    9.60    3.20
  -3   7  16  357.46   22.80
   3   7  16  395.66   17.30
  -3  -7  16  378.26   22.00
  -4   7  16   80.89   12.10
  -4  -7  16   77.29   11.50
  -5   7  16  133.29   15.90
  -5  -7  16  101.39   14.20
  -6   7  16   16.40   10.50
  -6  -7  16    9.10    9.50
   0  -8  16  518.75   26.80
   0   8  16  541.15   26.00
   1  -8  16   53.09    6.90
  -1   8  16   53.49    7.50
  -1  -8  16   45.30    6.90
   1   8  16   56.79    5.80
  -2   8  16  283.67   18.00
  -2  -8  16  242.98   16.50
   2   8  16  281.97   13.10
  -3   8  16  167.68   15.00
  -3  -8  16  167.18   14.50
  -4   8  16   24.10    8.80
  -4  -8  16   30.90    8.40
  -5   8  16   -1.80    8.10
  -5  -8  16    7.30    8.20
  -6   8  16   65.59   14.10
  -6  -8  16   75.59   12.70
   0   9  16  235.58   14.40
   0  -9  16  258.17   15.60
   1  -9  16   53.69    7.50
  -1   9  16   48.90    7.50
   1   9  16   45.10    5.10
  -1  -9  16   36.70    6.60
  -2   9  16  471.85   26.00
  -2  -9  16  490.35   26.10
  -3   9  16   -3.30    6.50
  -3  -9  16    7.00    6.60
  -4   9  16  144.09   15.20
  -4  -9  16  190.08   16.30
  -5   9  16   63.59   12.20
  -5  -9  16   62.09   11.20
  -6   9  16   -7.40    9.30
  -6  -9  16    8.20    9.10
   0  10  16   74.19    7.70
   0 -10  16   69.69    8.20
   1 -10  16  166.48   12.10
  -1 -10  16  170.48   12.60
   1  10  16  163.78    9.70
  -2  10  16  297.37   19.30
  -2 -10  16  307.87   19.30
  -3  10  16    9.60    7.40
  -3 -10  16   15.00    7.40
  -4  10  16   50.29   10.70
  -4 -10  16   32.60    9.00
  -5  10  16  114.49   15.80
  -5 -10  16   94.69   13.20
  -6  10  16   87.99   15.20
  -6 -10  16   62.39   12.60
   0 -11  16   44.30    7.50
   0  11  16   37.20    5.90
  -1  11  16   37.50    7.10
   1 -11  16   36.20    6.80
  -1 -11  16   31.70    7.50
  -2  11  16    5.80    6.60
  -2 -11  16   15.70    6.50
  -3  11  16  277.37   20.20
  -3 -11  16  283.87   19.60
  -4  11  16  109.69   14.30
  -4 -11  16   84.39   12.10
  -5  11  16   63.49   12.30
  -5 -11  16   43.50   10.30
   0 -12  16   25.90    6.80
   1 -12  16   92.89    9.70
  -1 -12  16   69.59    9.50
  -2  12  16   32.70    7.90
  -2 -12  16   43.80    8.60
  -3  12  16  177.98   16.40
  -3 -12  16  167.78   15.70
  -4  12  16    4.00    8.40
  -4 -12  16   -0.20    6.80
  -5  12  16   10.10    9.10
  -5 -12  16   14.40    8.80
   0 -13  16    4.80    6.10
   1 -13  16  339.37   19.60
  -1 -13  16  313.67   19.80
  -2 -13  16   31.20    7.80
  -3 -13  16   10.50    7.20
  -4  13  16    3.00    8.30
  -4 -13  16    0.40    8.10
   0 -14  16   76.29   10.10
   1 -14  16   12.70    6.60
  -1 -14  16    3.60    6.60
  -2 -14  16   83.29   11.20
  -3 -14  16   29.10    9.10
  -4 -14  16   46.30   10.30
   0 -15  16   91.29   11.60
   1 -15  16   60.19   10.10
  -1 -15  16   45.30    9.30
  -2 -15  16   22.70    8.40
  -3 -15  16    9.40    8.80
   0 -16  16  231.08   17.80
   1 -16  16   88.29   11.10
  -1 -16  16   81.19   10.80
  -2 -16  16  215.38   17.80
   0   0  17   10.80    4.50
   1   0  17  265.07   15.00
  -1   0  17  275.47   16.30
   2   0  17   66.29    6.40
  -2   0  17   63.89    8.60
  -3   0  17    9.80    6.50
   3   0  17   11.30    4.20
  -4   0  17   73.19   11.20
  -5   0  17  105.79   14.20
  -6   0  17   18.00    9.30
  -7   0  17   -0.50    8.60
   0  -1  17  252.57   15.00
   0   1  17  264.67   15.00
   1  -1  17  376.86   19.20
  -1   1  17  374.16   20.30
   1   1  17  367.46   18.90
  -1  -1  17  368.26   20.30
  -2   1  17    8.70    6.00
   2  -1  17   17.20    4.20
  -2  -1  17   27.30    6.40
   2   1  17   15.30    4.20
   3  -1  17   35.40    5.30
  -3   1  17   45.20    8.80
   3   1  17   37.20    5.00
  -3  -1  17   43.90    8.50
  -4   1  17   86.29   12.00
  -4  -1  17   75.99   10.70
  -5   1  17  124.19   14.10
  -5  -1  17  101.19   13.30
  -6   1  17   -1.50    8.60
  -6  -1  17    3.70    8.80
  -7   1  17   30.90   10.50
  -7  -1  17   40.40   11.60
   0   2  17  266.57   15.50
   0  -2  17  277.67   15.70
  -1   2  17  389.46   20.70
   1  -2  17  376.66   19.60
  -1  -2  17  391.76   20.90
   1   2  17  366.36   19.20
   2  -2  17   15.60    4.50
  -2   2  17   25.60    6.80
  -2  -2  17   18.60    6.30
   2   2  17   22.90    4.40
  -3   2  17  146.29   13.80
   3   2  17  145.39    9.20
  -3  -2  17  131.69   13.20
  -4   2  17    8.90    8.10
   4   2  17   15.80    4.00
  -4  -2  17   33.00    8.80
  -5   2  17   21.70    9.50
  -5  -2  17   19.00    8.90
  -6   2  17  135.79   16.90
  -6  -2  17  132.29   16.50
  -7   2  17  130.89   17.10
  -7  -2  17  118.79   15.70
   0   3  17  233.68   14.30
   0  -3  17  249.88   14.80
   1  -3  17  148.89   10.70
  -1   3  17  161.98   12.20
  -1  -3  17  148.09   11.40
   1   3  17  157.68   10.40
   2  -3  17  100.29    8.60
  -2   3  17   87.59   10.20
  -2  -3  17  103.79   10.50
   2   3  17   92.09    7.60
  -3   3  17  252.87   18.20
   3   3  17  262.97   13.70
  -3  -3  17  261.47   17.50
  -4   3  17  162.18   15.40
   4   3  17  149.49    9.30
  -4  -3  17  145.79   14.20
  -5   3  17  197.18   18.20
  -5  -3  17  170.78   16.70
  -6   3  17   33.90   10.50
  -6  -3  17   79.89   13.00
  -7   3  17   52.19   13.30
  -7  -3  17   41.90   12.30
   0  -4  17  270.47   15.80
   0   4  17  259.17   15.30
  -1   4  17   38.20    6.90
   1  -4  17   65.29    7.20
   1   4  17   50.39    6.00
  -1  -4  17   52.69    7.70
   2  -4  17  165.28   10.90
  -2   4  17  164.98   13.40
   2   4  17  148.59    9.80
  -2  -4  17  177.78   13.60
  -3   4  17  107.39   11.70
   3   4  17  119.19    7.90
  -3  -4  17  106.39   11.40
  -4   4  17  210.08   16.90
   4   4  17  214.18   11.60
  -4  -4  17  225.78   16.50
  -5   4  17  133.49   15.60
   5   4  17  116.29    8.30
  -5  -4  17  139.19   15.30
  -6   4  17   65.49   13.50
  -6  -4  17   83.69   13.00
  -7   4  17   45.20   12.70
  -7  -4  17   18.60   11.60
   0  -5  17    2.70    4.80
   0   5  17    3.60    4.20
  -1   5  17  268.97   17.00
   1  -5  17  265.17   16.00
  -1  -5  17  323.47   17.80
   1   5  17  305.67   15.70
  -2   5  17    2.50    6.10
   2  -5  17   13.40    5.00
  -2  -5  17   15.50    6.50
   2   5  17   12.60    3.60
  -3   5  17   34.90    8.30
   3   5  17   49.30    4.90
  -3  -5  17   54.49    8.50
  -4   5  17   59.49   10.90
   4   5  17   54.89    5.10
  -4  -5  17   51.69    9.20
  -5   5  17   67.29   12.40
  -5  -5  17   47.50   10.30
  -6   5  17   44.70   12.20
  -6  -5  17   50.89   11.50
   0  -6  17   40.60    6.40
   0   6  17   38.60    6.20
  -1   6  17  175.28   13.30
   1  -6  17  175.68   12.40
  -1  -6  17  164.28   12.70
   1   6  17  191.98   11.10
  -2   6  17  150.98   13.80
   2   6  17  158.78    9.60
  -2  -6  17  164.38   13.50
  -3   6  17  209.88   16.90
  -3  -6  17  232.98   16.00
   3   6  17  229.08   11.70
  -4   6  17   16.20    9.90
  -4  -6  17    9.00    7.30
  -5   6  17    5.00    8.90
  -5  -6  17   20.30    8.60
  -6   6  17   46.50   11.40
  -6  -6  17   49.90   12.50
   0   7  17   26.20    5.50
   0  -7  17   20.80    5.50
   1  -7  17  130.29   10.90
  -1   7  17  127.69   11.60
   1   7  17  130.69    9.50
  -1  -7  17  127.29   11.70
  -2   7  17  176.88   14.20
  -2  -7  17  142.09   12.30
   2   7  17  159.88    9.50
  -3   7  17   96.79   11.70
  -3  -7  17   87.59   11.10
  -4   7  17  136.59   15.10
  -4  -7  17  129.89   13.90
  -5   7  17   -2.10    8.20
  -5  -7  17   -3.20    8.10
  -6   7  17   11.00    9.60
  -6  -7  17    7.70    9.80
   0  -8  17  117.09   10.40
   0   8  17  119.29    9.90
  -1   8  17   21.60    6.20
   1  -8  17   29.30    6.10
   1   8  17   30.50    4.80
  -1  -8  17   23.60    6.20
  -2   8  17  211.88   16.30
  -2  -8  17  250.57   16.10
   2   8  17  219.68   11.60
  -3   8  17   47.20    9.40
  -3  -8  17   46.20    8.40
  -4   8  17   69.09   11.70
  -4  -8  17   78.39   11.60
  -5   8  17    6.50    8.70
  -5  -8  17   17.70    9.30
  -6   8  17   37.00   12.30
  -6  -8  17   59.59   12.50
   0   9  17   -3.00    4.00
   0  -9  17   -5.20    4.50
  -1   9  17   21.20    6.10
   1  -9  17   22.90    6.20
  -1  -9  17   26.60    6.20
   1   9  17   28.80    4.60
  -2   9  17   77.39   10.00
  -2  -9  17   74.49    9.80
  -3   9  17   18.00    7.70
  -3  -9  17   20.40    7.30
  -4   9  17   69.79   11.40
  -4  -9  17   54.39   10.20
  -5   9  17   30.70   10.90
  -5  -9  17   17.80    9.00
  -6   9  17  105.89   16.10
  -6  -9  17  108.09   15.90
   0  10  17   10.70    4.80
   0 -10  17    4.70    5.40
  -1  10  17   70.29    8.80
   1 -10  17   60.29    8.10
  -1 -10  17   71.99    9.20
  -2  10  17   43.60    8.60
  -2 -10  17   49.20    8.50
  -3  10  17   -4.40    6.90
  -3 -10  17   12.40    7.00
  -4  10  17   44.80   10.40
  -4 -10  17   32.90    9.30
  -5  10  17   20.80   10.40
  -5 -10  17   14.10    8.80
   0 -11  17   24.40    6.20
   0  11  17   35.80    6.00
   1 -11  17    6.20    5.70
  -1  11  17    3.80    5.30
  -1 -11  17    1.30    5.60
  -2  11  17   25.80    7.40
  -2 -11  17   10.50    6.60
  -3  11  17   21.30    8.30
  -3 -11  17   31.00    8.30
  -4  11  17  103.09   13.90
  -4 -11  17  102.99   13.00
  -5  11  17   -1.10    9.10
  -5 -11  17   23.60    9.40
   0 -12  17    9.50    6.40
   1 -12  17   30.60    7.30
  -1  12  17   22.70    6.60
  -1 -12  17   37.70    8.00
  -2  12  17  105.49   12.00
  -2 -12  17  142.89   13.40
  -3  12  17   13.20    7.70
  -3 -12  17   -6.50    6.80
  -4  12  17   34.20   10.30
  -4 -12  17   18.50    9.30
   0 -13  17    6.40    6.50
   1 -13  17  109.29   11.80
  -1 -13  17   90.79   10.90
  -2 -13  17    9.20    7.20
  -3  13  17   38.60    9.30
  -3 -13  17   47.10   10.10
  -4  13  17   40.10   10.50
  -4 -13  17   37.00   10.00
   0 -14  17  183.08   15.60
   1 -14  17  155.48   14.40
  -1 -14  17  165.68   14.30
  -2 -14  17   84.79   12.00
  -3 -14  17   -0.20    7.90
   0 -15  17   85.99   11.20
   1 -15  17   47.10    9.00
  -1 -15  17   34.50    8.40
  -2 -15  17   12.60    8.50
   0 -16  17   38.10    8.80
   0   0  18  188.28   12.70
   1   0  18   28.30    5.60
  -1   0  18   27.40    6.40
   2   0  18   98.79    8.50
  -2   0  18  127.89   12.00
  -3   0  18   47.30    8.80
   3   0  18   53.59    6.30
  -4   0  18  208.18   17.60
  -5   0  18   16.00    8.40
  -6   0  18   37.80   11.60
   0   1  18   13.20    5.10
   0  -1  18   21.00    5.40
   1  -1  18   42.00    6.00
  -1   1  18   37.00    6.50
   1   1  18   34.20    5.60
  -1  -1  18   25.00    6.20
  -2   1  18  172.28   13.50
   2  -1  18  185.38   11.70
   2   1  18  191.08   11.60
  -2  -1  18  186.48   14.40
  -3   1  18  133.59   13.40
   3  -1  18  130.89   10.10
  -3  -1  18  140.29   14.00
   3   1  18  146.59    9.60
  -4   1  18   12.40    7.90
   4   1  18    4.50    3.80
  -4  -1  18   -1.00    6.50
  -5   1  18   62.69   12.50
  -5  -1  18   89.09   13.20
  -6   1  18   67.49   13.70
  -6  -1  18   53.89   12.50
   0   2  18   41.60    6.50
   0  -2  18   39.20    6.60
   1  -2  18   34.70    6.00
  -1   2  18   30.70    6.50
   1   2  18   43.30    6.00
  -1  -2  18   37.70    7.10
   2  -2  18  156.48   10.70
  -2   2  18  155.08   13.50
   2   2  18  163.58   10.50
  -2  -2  18  144.49   12.40
  -3   2  18  211.88   16.50
   3  -2  18  211.28   12.90
   3   2  18  193.48   11.70
  -3  -2  18  202.58   15.50
  -4   2  18  307.17   20.80
   4   2  18  303.77   16.00
  -4  -2  18  316.07   21.50
  -5   2  18    6.10    8.70
  -5  -2  18   -1.30    8.20
  -6   2  18    5.10    8.90
  -6  -2  18   -5.30    8.40
   0  -3  18   99.59    9.40
   0   3  18   84.29    8.60
   1  -3  18    9.10    4.90
  -1   3  18    7.10    4.90
   1   3  18    4.60    4.00
  -1  -3  18    2.10    4.80
  -2   3  18   99.19   10.70
   2  -3  18   92.29    8.50
   2   3  18   89.29    7.90
  -2  -3  18   79.69   10.00
  -3   3  18  224.68   16.50
  -3  -3  18  227.88   17.10
   3   3  18  221.68   12.50
  -4   3  18   92.49   12.40
  -4  -3  18  114.39   12.90
   4   3  18  104.69    7.90
  -5   3  18   42.90   10.10
   5   3  18   34.10    5.10
  -5  -3  18   33.10    9.80
  -6   3  18    7.40    9.80
  -6  -3  18   16.40    9.70
   0   4  18  166.18   11.40
   0  -4  18  148.69   11.40
   1  -4  18  113.69   10.10
  -1   4  18  110.09   10.50
   1   4  18  126.09    9.50
  -1  -4  18  123.69   11.30
   2  -4  18  347.57   18.70
  -2   4  18  347.47   20.80
  -2  -4  18  343.17   20.30
   2   4  18  346.87   17.60
  -3   4  18   31.10    8.40
   3   4  18   32.40    4.60
  -3  -4  18   25.40    8.00
  -4   4  18  314.97   21.80
   4   4  18  307.17   15.60
  -4  -4  18  304.37   20.60
  -5   4  18   16.00    9.20
  -5  -4  18   25.50    9.80
  -6   4  18   30.30   10.50
  -6  -4  18   40.20   11.70
   0   5  18   35.60    6.10
   0  -5  18   24.70    6.10
  -1   5  18  319.57   18.90
   1  -5  18  325.97   17.80
   1   5  18  322.77   17.10
  -1  -5  18  312.97   18.90
   2  -5  18  140.19   10.30
  -2   5  18  140.89   13.30
   2   5  18  124.79    9.10
  -2  -5  18  132.99   12.20
  -3   5  18   82.49   11.30
  -3  -5  18   67.99   10.40
   3   5  18   74.99    6.40
  -4   5  18   -3.50    7.30
  -4  -5  18    1.80    6.70
   4   5  18    3.10    3.10
  -5   5  18   51.49   11.40
  -5  -5  18   53.69   11.20
  -6   5  18   29.20   11.00
  -6  -5  18   31.30   10.50
   0   6  18  689.63   32.60
   0  -6  18  670.33   33.20
  -1   6  18   35.00    7.40
   1  -6  18   50.59    7.30
  -1  -6  18   33.90    6.80
   1   6  18   45.80    5.90
  -2   6  18  170.28   14.40
   2  -6  18  174.38   12.20
  -2  -6  18  182.48   14.70
   2   6  18  175.98   10.60
  -3   6  18  201.68   16.60
   3   6  18  183.58   10.80
  -3  -6  18  228.68   16.30
  -4   6  18   21.60    8.70
  -4  -6  18   21.00    8.50
  -5   6  18    6.60    8.40
  -5  -6  18    0.70    7.60
  -6   6  18   -3.50    9.60
  -6  -6  18   20.30   10.50
   0  -7  18  172.98   13.10
  -1   7  18  199.98   14.60
   1  -7  18  208.28   14.10
   1   7  18  201.48   12.50
  -1  -7  18  207.88   15.00
  -2   7  18  198.38   15.40
   2  -7  18  210.78   13.70
   2   7  18  210.28   11.70
  -2  -7  18  201.48   14.90
  -3   7  18  104.89   12.30
  -3  -7  18   65.29    9.70
  -4   7  18   55.39   10.50
  -4  -7  18   61.99   10.10
  -5   7  18   34.40    9.80
  -5  -7  18   10.50    9.80
  -6   7  18   67.39   14.30
  -6  -7  18   86.29   13.70
   0  -8  18   96.69   10.20
   0   8  18   96.99    9.20
   1  -8  18  375.16   20.40
  -1   8  18  361.06   20.50
   1   8  18  362.96   18.40
  -1  -8  18  326.27   20.70
  -2   8  18   74.59   10.20
   2  -8  18  102.29   10.20
  -2  -8  18  108.69   11.50
  -3   8  18  182.68   16.30
  -3  -8  18  197.18   16.10
  -4   8  18   49.80   10.90
  -4  -8  18   53.79   10.70
  -5   8  18   -7.50    8.20
  -5  -8  18   10.30    9.10
   0   9  18   30.90    5.80
   0  -9  18   43.80    8.00
  -1   9  18   36.30    7.30
   1  -9  18   39.30    7.10
  -1  -9  18   52.49    8.50
   1   9  18   46.00    5.70
   2  -9  18  119.19   10.90
  -2   9  18   99.99   11.40
  -2  -9  18  102.59   11.70
  -3   9  18   29.50    8.40
  -3  -9  18   34.40    8.90
  -4   9  18   35.30    9.80
  -4  -9  18   27.10    9.40
  -5   9  18   24.40   10.70
  -5  -9  18   30.90    9.90
   0  10  18   18.20    5.20
   0 -10  18   22.70    6.30
  -1  10  18   99.89   10.50
   1 -10  18  127.29   11.90
  -1 -10  18  121.59   11.90
   2 -10  18  179.38   13.30
  -2  10  18  146.19   14.10
  -2 -10  18  163.68   14.90
  -3  10  18  213.18   17.00
  -3 -10  18  183.98   17.00
  -4  10  18   46.70   10.50
  -4 -10  18   67.99   12.00
  -5  10  18   32.10   12.70
  -5 -10  18   29.50   10.00
   0 -11  18   33.60    7.30
   1 -11  18   49.70    8.40
  -1  11  18   55.09    8.30
  -1 -11  18   43.90    8.20
  -2  11  18  105.69   11.70
  -2 -11  18   89.59   11.20
  -3 -11  18   14.90    8.30
  -4  11  18   -1.90    7.80
  -4 -11  18    0.50    8.40
   0 -12  18    2.20    5.60
  -1  12  18   71.79    9.10
   1 -12  18   66.89    9.40
  -1 -12  18   88.29   10.90
  -2  12  18   22.70    7.60
   2 -12  18   17.80    7.00
  -2 -12  18   21.10    7.90
  -3  12  18    5.90    7.70
  -3 -12  18    3.40    7.30
  -4  12  18  161.38   17.40
  -4 -12  18  179.88   17.10
   0 -13  18    7.50    6.20
   1 -13  18   13.90    7.20
  -1 -13  18   21.80    7.90
  -2  13  18   96.99   11.50
   2 -13  18  107.69   11.60
  -2 -13  18   95.39   12.00
  -3  13  18   17.70    7.90
  -3 -13  18    1.80    8.30
   0 -14  18   23.80    7.80
   1 -14  18    9.20    7.10
  -1 -14  18   -9.50    6.10
   2 -14  18    9.80    7.60
  -2 -14  18   25.90    8.60
   0 -15  18   18.20    7.80
   1 -15  18   92.49   12.10
  -1 -15  18   84.49   11.50
   0   0  19    2.40    4.60
  -1   0  19   76.79    8.80
   1   0  19   73.49    7.70
   2   0  19   64.79    7.00
  -2   0  19   48.10    8.30
  -3   0  19  147.89   14.60
   3   0  19  143.99   10.10
   4   0  19   22.80    5.20
  -4   0  19   38.10    9.70
  -5   0  19  300.27   22.00
  -6   0  19    6.60    9.20
   0  -1  19    8.00    5.10
   0   1  19    4.90    4.80
  -1   1  19  259.67   16.30
   1  -1  19  246.18   14.80
  -1  -1  19  242.08   15.60
   1   1  19  242.98   14.70
   2  -1  19   75.19    7.50
  -2   1  19   70.29    9.30
  -2  -1  19   54.49    8.70
   2   1  19   68.89    7.10
  -3   1  19  113.99   12.80
   3  -1  19  117.49    9.50
   3   1  19  127.79    9.20
  -3  -1  19  126.69   13.30
  -4   1  19   83.69   11.80
  -4  -1  19   48.60   10.70
   4   1  19   86.09    8.10
  -5   1  19  116.99   15.30
  -5  -1  19  139.99   16.20
  -6   1  19  145.59   17.50
  -6  -1  19  108.19   14.90
   0  -2  19  569.44   28.30
   0   2  19  573.24   28.30
  -1   2  19   52.39    7.80
   1  -2  19   46.30    6.80
  -1  -2  19   52.79    8.00
   1   2  19   38.60    6.10
   2  -2  19   82.29    8.20
  -2   2  19   68.49    9.90
   2   2  19   71.69    7.20
  -2  -2  19   82.69   10.40
   3  -2  19  105.19    9.30
  -3   2  19  127.99   13.40
  -3  -2  19   97.19   11.70
   3   2  19  102.59    8.70
  -4   2  19   62.19   10.80
  -4  -2  19   59.49   11.40
   4   2  19   68.69    6.70
  -5   2  19   50.39   11.00
  -5  -2  19   24.70   10.80
   5   2  19   48.50    6.20
  -6   2  19   63.59   13.50
  -6  -2  19   69.69   12.60
   0  -3  19  183.78   13.40
   0   3  19  199.48   13.30
   1  -3  19   76.89    8.40
  -1   3  19   84.59    9.50
  -1  -3  19   82.39    9.10
   1   3  19   94.59    8.50
  -2   3  19  146.19   13.40
   2  -3  19  154.28   11.30
  -2  -3  19  150.88   13.00
   2   3  19  145.39   10.20
   3  -3  19   37.40    6.10
  -3   3  19   37.00    8.90
   3   3  19   28.50    4.90
  -3  -3  19   24.80    7.60
  -4   3  19   72.79   11.70
   4   3  19   68.19    6.60
  -4  -3  19   71.39   11.40
  -5   3  19   29.80   10.50
   5   3  19   31.20    5.30
  -5  -3  19   32.00   10.30
  -6   3  19  144.49   17.10
  -6  -3  19  136.09   16.70
   0  -4  19   15.90    5.80
   0   4  19    6.70    4.80
   1  -4  19   21.10    5.90
  -1   4  19   25.90    6.60
   1   4  19   26.20    5.30
  -1  -4  19   33.80    7.10
  -2   4  19  122.59   12.50
   2  -4  19  128.89   10.50
  -2  -4  19  107.59   11.50
   3  -4  19   36.90    6.80
  -3   4  19   43.00    9.30
  -3  -4  19   36.50    8.90
   3   4  19   43.50    5.40
  -4   4  19   29.60    8.50
   4   4  19   12.50    4.00
  -4  -4  19    6.60    8.00
  -5   4  19   36.80   11.40
  -5  -4  19   49.40   11.10
  -6   4  19    9.20   10.50
  -6  -4  19    3.60    9.70
   0   5  19    6.30    5.10
   0  -5  19    9.40    5.50
  -1   5  19   32.60    7.10
   1  -5  19   31.80    6.50
  -1  -5  19   37.20    7.10
   2  -5  19    8.60    5.10
  -2   5  19   10.80    6.90
  -2  -5  19   12.30    6.20
   2   5  19    9.60    4.00
  -3   5  19  119.99   12.80
  -3  -5  19  121.39   13.00
   3   5  19  121.39    8.60
  -4   5  19   52.99   10.90
  -4  -5  19   49.70   10.30
  -5   5  19   36.70   10.80
  -5  -5  19   36.70   10.30
  -6   5  19   22.10   10.90
  -6  -5  19   23.20    9.90
   0  -6  19   72.39    8.60
   0   6  19   67.19    8.20
   1  -6  19   36.00    6.90
  -1   6  19   23.10    6.80
   1   6  19   32.80    5.50
  -1  -6  19   34.50    7.30
  -2   6  19  187.08   16.20
   2  -6  19  223.78   13.90
   2   6  19  207.58   12.20
  -2  -6  19  215.38   16.20
  -3   6  19   22.50    8.00
  -3  -6  19   31.90    8.00
  -4   6  19  137.09   15.40
  -4  -6  19  164.18   15.10
  -5   6  19   72.39   13.30
  -5  -6  19   52.89   11.70
  -6   6  19   22.40   10.20
  -6  -6  19   -2.80    9.30
   0  -7  19  414.66   22.90
   0   7  19  433.36   22.40
   1  -7  19  249.08   16.00
  -1   7  19  247.38   16.50
   1   7  19  252.47   14.50
  -1  -7  19  243.68   16.40
  -2   7  19   64.39    9.90
   2  -7  19   62.69    8.10
   2   7  19   69.39    6.40
  -2  -7  19   59.19    9.50
  -3   7  19   47.50    9.70
  -3  -7  19   70.79   10.70
  -4   7  19    4.70    8.00
  -4  -7  19    4.70    7.60
  -5   7  19   -7.90    8.50
  -5  -7  19    2.20    8.80
   0   8  19   20.90    5.50
   0  -8  19    2.90    5.50
   1  -8  19   26.70    6.80
  -1   8  19   27.00    6.70
  -1  -8  19   19.10    7.20
   1   8  19   16.60    4.80
   2  -8  19   92.09   10.20
  -2   8  19   81.49   10.60
  -2  -8  19   86.49   11.10
  -3   8  19    0.00    6.90
  -3  -8  19    8.80    7.10
  -4   8  19  272.77   21.20
  -4  -8  19  300.37   20.70
  -5   8  19  115.79   16.40
  -5  -8  19  167.88   17.90
   0   9  19   14.10    5.20
   0  -9  19   15.00    6.20
  -1   9  19   40.30    7.40
   1  -9  19   34.50    7.10
  -1  -9  19   52.69    8.70
  -2   9  19   45.90    9.00
   2  -9  19   58.99    8.20
  -2  -9  19   41.70    9.00
  -3   9  19   -2.50    6.90
  -3  -9  19   -5.80    6.00
  -4   9  19   26.90    9.80
  -4  -9  19   13.50    8.70
  -5   9  19   36.10   10.90
  -5  -9  19   41.70   11.70
   0 -10  19    7.20    6.40
   0  10  19    4.50    4.80
   1 -10  19  171.18   14.00
  -1  10  19  167.48   13.20
  -1 -10  19  155.58   13.40
  -2  10  19   25.80    7.60
   2 -10  19   29.10    7.40
  -2 -10  19   33.90    8.40
  -3  10  19   36.90    9.10
  -3 -10  19   36.30    9.20
  -4  10  19   37.60   10.40
  -4 -10  19   73.89   12.20
   0 -11  19  178.08   14.00
   1 -11  19  174.48   13.90
  -1  11  19  172.08   13.70
  -1 -11  19  165.88   14.10
  -2  11  19    3.40    6.50
   2 -11  19    3.00    6.70
  -2 -11  19   18.50    7.70
  -3  11  19    6.80    7.60
  -3 -11  19   27.00    9.30
  -4  11  19   17.90    9.10
  -4 -11  19    5.10    8.30
   0 -12  19    8.50    7.10
   1 -12  19   11.00    6.40
  -1 -12  19   25.80    7.80
   2 -12  19   63.69    9.80
  -2  12  19   63.99   10.10
  -2 -12  19   44.20    9.30
  -3  12  19   79.59   12.10
  -3 -12  19   62.89   11.50
   0 -13  19   44.10    9.10
   1 -13  19   97.69   11.30
  -1 -13  19  104.19   12.60
   2 -13  19   17.80    7.80
  -2 -13  19   18.50    8.50
  -3  13  19    8.70    8.10
  -3 -13  19   26.70    9.20
   0 -14  19  308.17   20.80
   1 -14  19   42.80    8.70
  -1 -14  19   26.30    9.00
   0   0  20  325.07   18.90
   1   0  20  169.58   12.10
  -1   0  20  151.88   13.10
  -2   0  20  322.57   20.30
   2   0  20  311.97   17.50
   3   0  20   -4.40    3.80
  -3   0  20    8.10    7.50
   4   0  20   93.19    8.90
  -4   0  20   86.49   13.00
  -5   0  20   20.90    9.90
  -6   0  20  287.07   22.90
   0   1  20    9.20    5.20
   0  -1  20    9.10    5.00
   1  -1  20  120.29   10.80
  -1   1  20  138.59   12.00
   1   1  20  110.59   10.00
  -1  -1  20  123.89   11.20
  -2   1  20  141.29   13.20
   2  -1  20  119.89   10.30
  -2  -1  20  108.79   12.10
   2   1  20  119.79   10.00
   3  -1  20  190.68   12.30
  -3   1  20  189.98   16.50
   3   1  20  178.78   11.90
  -3  -1  20  178.18   15.30
  -4   1  20    3.00    7.70
   4  -1  20   14.90    5.20
   4   1  20   18.10    4.80
  -4  -1  20   12.90    8.00
  -5   1  20   52.39   11.80
   5   1  20   51.39    6.80
  -5  -1  20   64.49   13.20
  -6   1  20    2.40    9.20
  -6  -1  20   -4.30    9.00
   0  -2  20  134.59   11.80
   0   2  20  141.59   11.50
  -1   2  20  134.99   12.20
   1  -2  20  125.69   10.90
   1   2  20  124.49   10.20
  -1  -2  20  134.29   12.30
   2  -2  20  136.29   10.70
  -2   2  20  146.09   13.50
  -2  -2  20  110.39   11.90
   2   2  20  138.99   10.30
  -3   2  20   23.30    8.80
   3  -2  20   29.60    5.90
   3   2  20   25.90    5.30
  -3  -2  20   24.50    8.90
  -4   2  20   18.70    8.90
   4  -2  20   18.90    5.80
   4   2  20   13.20    4.50
  -4  -2  20   27.20    9.70
  -5   2  20   77.69   13.00
   5   2  20   68.79    7.30
  -5  -2  20   83.49   13.80
  -6   2  20    1.10   10.10
  -6  -2  20   -4.40    9.00
   0  -3  20   21.80    5.80
   0   3  20   16.60    5.70
  -1   3  20  260.77   16.50
   1  -3  20  225.88   15.10
  -1  -3  20  249.18   16.20
   1   3  20  254.67   15.00
  -2   3  20  176.38   14.70
   2  -3  20  155.68   12.00
  -2  -3  20  175.78   14.80
   2   3  20  167.78   11.20
  -3   3  20   99.39   12.30
   3  -3  20   82.99    8.80
  -3  -3  20   81.19   11.50
   3   3  20   88.49    8.30
  -4   3  20   66.69   11.90
  -4  -3  20   58.89   11.80
   4   3  20   63.79    6.70
  -5   3  20   40.90   11.80
  -5  -3  20   59.39   12.60
  -6   3  20   35.80   11.50
  -6  -3  20   25.30   10.50
   0   4  20  226.58   14.80
   0  -4  20  221.48   14.70
  -1   4  20   34.50    7.30
   1  -4  20   31.80    6.40
   1   4  20   28.70    5.70
  -1  -4  20   30.90    7.30
  -2   4  20  190.18   15.60
   2  -4  20  205.18   13.70
   2   4  20  193.18   12.40
  -2  -4  20  212.98   16.20
  -3   4  20   85.49   11.80
   3  -4  20   95.99    9.40
  -3  -4  20   97.59   12.00
   3   4  20   88.99    8.00
  -4   4  20  116.29   14.40
   4   4  20  110.99   12.50
  -4  -4  20  132.39   15.70
  -5   4  20   22.00    9.50
  -5  -4  20   33.30   11.00
   0  -5  20    2.60    5.30
   0   5  20   -0.60    4.80
  -1   5  20  107.79   11.20
   1  -5  20  120.69   11.20
  -1  -5  20  127.59   11.60
   1   5  20  114.69    9.90
   2  -5  20  359.26   20.70
  -2   5  20  384.66   22.70
   2   5  20  380.86   19.40
  -2  -5  20  376.96   22.80
   3  -5  20  138.79   12.10
  -3   5  20  154.98   14.90
   3   5  20  150.18    9.90
  -3  -5  20  146.39   14.80
  -4   5  20   51.29   10.60
  -4  -5  20   68.59   11.70
  -5   5  20   22.90    9.50
  -5  -5  20   13.60    9.00
   0   6  20  111.89   10.40
   0  -6  20  119.19   11.40
  -1   6  20  202.98   15.60
   1  -6  20  229.08   15.20
  -1  -6  20  231.18   16.30
   1   6  20  224.18   13.80
  -2   6  20  384.06   23.60
   2  -6  20  408.76   22.20
   2   6  20  408.36   20.40
  -2  -6  20  416.76   23.80
  -3   6  20  114.19   13.40
   3  -6  20  102.19   10.50
  -3  -6  20   83.79   12.20
  -4   6  20   30.40    9.80
  -4  -6  20   28.20    9.00
  -5   6  20   80.39   13.10
  -5  -6  20   85.89   13.90
   0   7  20    3.30    5.10
   0  -7  20   -1.80    5.80
  -1   7  20   54.69    8.50
   1  -7  20   57.09    7.90
   1   7  20   59.59    7.00
  -1  -7  20   47.90    8.30
   2  -7  20   76.89    9.00
  -2   7  20   74.29   10.30
  -2  -7  20   58.99   10.20
   3  -7  20   48.80    7.90
  -3   7  20   33.80    9.50
  -3  -7  20   52.59   10.00
  -4   7  20    2.60    8.00
  -4  -7  20   -2.10    7.70
  -5   7  20   25.60   10.40
  -5  -7  20   55.89   11.40
   0   8  20   13.90    5.50
   0  -8  20   21.30    6.90
  -1   8  20   34.10    7.40
   1  -8  20   19.80    6.80
  -1  -8  20   15.60    6.90
   1   8  20   31.20    5.70
  -2   8  20   55.69    9.30
   2  -8  20   55.69    8.60
  -2  -8  20   53.99    9.70
  -3   8  20   71.59   11.10
  -3  -8  20   47.30    9.40
  -4   8  20   19.30    8.90
  -4  -8  20   17.60    8.90
  -5   8  20   12.40    9.10
  -5  -8  20   10.10    9.50
   0  -9  20  143.69   13.70
   0   9  20  146.19   11.70
  -1   9  20   42.00    7.90
   1  -9  20   66.09    9.40
  -1  -9  20   61.59    9.20
  -2   9  20   82.79   10.80
   2  -9  20   77.59    9.60
  -2  -9  20   98.59   11.90
  -3   9  20   -4.30    6.90
  -3  -9  20   -2.90    6.50
  -4   9  20   97.59   13.10
  -4  -9  20  113.79   14.40
   0 -10  20   80.69   10.20
  -1  10  20   11.60    6.10
   1 -10  20    6.70    6.20
  -1 -10  20    9.60    6.40
  -2  10  20  274.27   19.00
   2 -10  20  277.97   18.70
  -2 -10  20  287.97   19.80
  -3  10  20   88.79   11.90
  -3 -10  20  100.49   12.60
  -4  10  20   69.99   12.20
  -4 -10  20   75.49   13.00
   0 -11  20    5.50    6.70
   1 -11  20   80.99   10.90
  -1  11  20   71.49   12.30
  -1 -11  20   98.29   12.20
   2 -11  20   77.69   10.70
  -2  11  20   59.49    9.80
  -2 -11  20   66.29   11.00
  -3  11  20    9.90    8.40
  -3 -11  20   17.00    8.40
   0 -12  20   -2.40    6.10
   1 -12  20   83.69   11.00
  -1 -12  20   62.99   10.20
  -2  12  20   13.40    7.30
   2 -12  20    6.50    7.60
  -2 -12  20    8.40    7.50
  -3  12  20   73.29   11.80
  -3 -12  20   64.89   12.30
   0 -13  20  114.29   12.70
   1 -13  20   13.50    7.50
  -1 -13  20   11.00    8.10
   2 -13  20   18.60    8.40
  -2 -13  20   14.90    8.90
   0   0  21    4.90    5.30
   1   0  21   12.20    5.50
  -1   0  21    3.20    6.00
  -2   0  21    9.10    6.50
   2   0  21    7.70    5.00
   3   0  21   16.90    5.20
  -3   0  21   22.90    8.20
  -4   0  21  181.88   18.00
   4   0  21  180.98   12.40
   5   0  21   42.30    6.90
  -5   0  21   37.60   11.50
   0   1  21 1059.59   49.50
   0  -1  21 1077.69   49.70
  -1   1  21  142.39   13.00
   1  -1  21  140.79   11.60
   1   1  21  149.09   11.80
  -1  -1  21  151.88   13.20
   2  -1  21    3.00    4.80
  -2   1  21   -1.50    6.10
  -2  -1  21   -1.90    6.20
   2   1  21   -1.90    4.30
  -3   1  21  145.59   14.90
   3  -1  21  119.79   10.40
   3   1  21  103.09    9.70
  -3  -1  21  105.39   13.00
   4  -1  21   62.89    7.50
  -4   1  21   48.20   10.60
   4   1  21   60.09    7.00
  -4  -1  21   34.50   10.00
  -5   1  21  111.19   14.80
  -5  -1  21  160.88   17.70
   5   1  21  106.29    9.90
   0   2  21  152.88   12.80
   0  -2  21  159.78   13.00
   1  -2  21   66.79    8.30
  -1   2  21   82.69   10.10
   1   2  21   78.19    8.50
  -1  -2  21   89.99   10.20
  -2   2  21   12.50    6.90
   2  -2  21   16.00    5.50
  -2  -2  21   22.70    7.70
   2   2  21   15.10    5.00
   3  -2  21   19.10    5.70
  -3   2  21   25.10    9.10
   3   2  21   35.20    6.00
  -3  -2  21   31.00    8.40
   4  -2  21   36.50    6.60
  -4   2  21   30.30   10.20
  -4  -2  21   31.60    9.90
   4   2  21   32.90    5.70
  -5   2  21   10.10    9.60
  -5  -2  21   -7.50    9.30
   0  -3  21  109.79   11.00
   0   3  21  113.19   10.70
  -1   3  21  107.49   10.80
   1  -3  21   90.59    9.70
  -1  -3  21   89.39   10.30
   1   3  21   94.29    9.10
   2  -3  21   96.79    9.80
  -2   3  21   84.29   11.20
   2   3  21   88.99    8.50
  -2  -3  21   78.09   11.20
  -3   3  21   41.60    9.80
   3  -3  21   57.79    7.60
  -3  -3  21   29.50    9.50
   3   3  21   42.70    6.10
   4  -3  21   10.80    5.90
  -4   3  21   22.20    9.40
  -4  -3  21   13.80    9.40
   4   3  21    6.10    4.40
  -5   3  21   38.70   11.20
  -5  -3  21   43.00   12.20
   0   4  21    7.80    5.50
   0  -4  21   13.50    6.30
   1  -4  21  247.78   17.00
  -1   4  21  280.47   17.30
  -1  -4  21  230.18   16.60
   1   4  21  260.57   15.50
  -2   4  21  121.89   12.80
   2  -4  21  107.49   10.30
   2   4  21  109.79    9.60
  -2  -4  21  116.99   12.90
   3  -4  21   38.80    7.10
  -3   4  21   40.00    9.50
   3   4  21   52.09    6.30
  -3  -4  21   41.80    9.90
   4  -4  21  103.19   10.70
  -4   4  21  158.18   16.30
  -4  -4  21   93.89   13.50
  -5   4  21    9.50    9.60
  -5  -4  21   16.90    9.70
   0   5  21  258.67   16.30
   0  -5  21  254.17   17.00
   1  -5  21   24.20    7.00
  -1   5  21   32.80    7.40
  -1  -5  21   30.00    7.30
   1   5  21   32.70    6.20
  -2   5  21   99.39   11.90
   2  -5  21   95.39   10.20
   2   5  21   97.79    9.10
  -2  -5  21   92.49   11.80
  -3   5  21   28.50    9.10
   3  -5  21   34.00    6.70
  -3  -5  21   20.20    8.20
  -4   5  21   16.30    9.30
  -4  -5  21   22.60    9.30
  -5   5  21   65.99   13.20
  -5  -5  21   80.89   13.10
   0  -6  21  130.39   12.40
   0   6  21  109.49   10.80
  -1   6  21    4.00    6.10
   1  -6  21    8.60    5.40
   1   6  21    8.50    4.70
  -1  -6  21    6.40    6.80
  -2   6  21  100.09   11.70
   2  -6  21   79.89    9.40
   2   6  21   96.89    8.80
  -2  -6  21   89.89   11.10
  -3   6  21  156.88   15.90
   3  -6  21  173.28   13.60
  -3  -6  21  189.78   17.20
  -4   6  21  249.38   20.80
  -4  -6  21  283.27   21.40
  -5   6  21   33.40   11.30
  -5  -6  21   33.60   10.80
   0  -7  21  300.07   18.90
   0   7  21  312.57   18.50
  -1   7  21   38.00    7.80
   1  -7  21   42.10    7.50
   1   7  21   40.50    6.50
  -1  -7  21   51.39    9.00
  -2   7  21   61.89    9.70
   2  -7  21   48.30    8.20
  -2  -7  21   46.40   10.10
  -3   7  21   55.89   10.40
   3  -7  21   68.89    9.10
  -3  -7  21   68.79   11.10
  -4   7  21   18.80    9.70
  -4  -7  21   19.50    8.50
   0  -8  21  258.97   17.20
   0   8  21  249.48   16.20
  -1   8  21  383.76   21.80
   1  -8  21  366.96   21.20
  -1  -8  21  340.87   21.70
   2  -8  21  136.39   13.20
  -2   8  21  136.49   13.90
  -2  -8  21  158.38   15.20
  -3   8  21    7.60    7.60
   3  -8  21   -5.00    6.30
  -3  -8  21   11.50    8.10
  -4   8  21   27.90    9.30
  -4  -8  21    4.60    8.00
   0  -9  21   -2.30    6.10
   0   9  21    4.70    6.40
   1  -9  21   18.10    7.20
  -1   9  21   20.90    7.00
  -1  -9  21   30.40    7.90
  -2   9  21  101.89   12.00
   2  -9  21   98.79   10.90
  -2  -9  21  108.89   12.70
   3  -9  21   10.50    7.10
  -3   9  21   11.10    7.60
  -3  -9  21   12.10    8.90
  -4   9  21    6.40    8.70
  -4  -9  21   -0.50    7.90
   0 -10  21   99.89   11.80
   1 -10  21   81.39   10.70
  -1  10  21   72.79    9.60
  -1 -10  21   71.19   10.50
  -2  10  21   19.90    7.60
   2 -10  21    9.70    7.50
  -2 -10  21   26.30    9.30
  -3  10  21    9.90    7.90
   3 -10  21   19.10    7.40
  -3 -10  21   14.20    9.00
   0 -11  21   40.70    9.20
   1 -11  21    5.90    7.30
  -1 -11  21    9.20    7.70
   2 -11  21   -2.80    7.00
  -2  11  21   -3.90    6.40
  -2 -11  21    8.40    7.90
   3 -11  21   39.20    9.50
  -3 -11  21   28.00    9.50
   0 -12  21   12.50    7.70
   1 -12  21   37.80    8.60
  -1 -12  21   37.00    8.80
   2 -12  21   25.80    8.60
  -2 -12  21   42.20    9.70
   0   0  22   13.30    6.20
  -1   0  22  130.59   12.90
   1   0  22  114.69   10.80
   2   0  22   39.50    6.90
  -2   0  22   53.49    9.90
  -3   0  22   14.10    8.20
   3   0  22   12.30    5.30
   4   0  22    3.30    5.10
  -4   0  22   -8.00    8.20
   5   0  22   22.20    6.10
  -5   0  22   17.30   10.60
   0  -1  22    6.70    5.90
   0   1  22   10.80    6.10
  -1   1  22  121.19   12.30
   1  -1  22  110.59   10.60
  -1  -1  22  107.19   11.50
   1   1  22  101.09   10.10
   2  -1  22   82.79    9.00
  -2   1  22   91.29   11.60
  -2  -1  22   90.49   11.40
   2   1  22   81.79    8.80
  -3   1  22  120.29   13.90
   3  -1  22  135.09   11.20
   3   1  22  118.19   10.60
  -3  -1  22  138.19   15.20
  -4   1  22   -5.00    7.90
   4  -1  22    0.90    5.00
   4   1  22   -6.10    4.30
  -4  -1  22    2.50    8.50
  -5   1  22   10.00    9.30
   5  -1  22   21.30    6.20
   5   1  22   14.70    8.50
  -5  -1  22   12.40   10.50
   0   2  22   35.60    7.40
   0  -2  22   34.40    7.20
   1  -2  22   51.09    8.00
  -1   2  22   44.90    8.30
   1   2  22   60.09    7.70
  -1  -2  22   60.59    9.40
   2  -2  22   44.50    7.50
  -2   2  22   43.90    9.20
  -2  -2  22   41.30    9.30
   2   2  22   30.00    6.20
   3  -2  22   73.89    8.40
  -3   2  22   73.49   11.30
   3   2  22   71.19    8.00
  -3  -2  22   65.39   11.50
  -4   2  22   72.09   12.70
   4  -2  22   59.79    8.30
  -4  -2  22   52.29   11.20
   4   2  22   69.29    7.70
   5  -2  22    5.70    6.00
  -5   2  22    7.80   10.30
  -5  -2  22    9.80   10.60
   0   3  22   31.10    6.90
   0  -3  22   29.50    7.20
  -1   3  22   91.19   10.80
   1  -3  22   76.09    9.70
  -1  -3  22   65.99    9.50
   1   3  22   77.59    8.90
  -2   3  22  357.16   22.50
   2  -3  22  367.76   20.60
  -2  -3  22  361.56   22.90
   2   3  22  356.66   19.60
   3  -3  22   61.49    8.30
  -3   3  22   74.79   11.60
  -3  -3  22   78.69   12.00
   3   3  22   76.89    7.90
   4  -3  22   10.50    5.90
  -4   3  22    6.00    9.30
  -4  -3  22   30.00    9.60
  -5   3  22   34.30   10.90
  -5  -3  22   30.70   11.20
   0  -4  22  156.88   13.60
   0   4  22  154.88   12.60
   1  -4  22   20.60    6.90
  -1   4  22   21.60    7.30
  -1  -4  22   24.50    7.20
   1   4  22   26.70    6.20
   2  -4  22    2.70    5.20
  -2   4  22    5.40    7.10
   2   4  22    3.00    4.60
  -2  -4  22   14.50    7.50
  -3   4  22   90.49   12.30
   3  -4  22  115.59   11.00
  -3  -4  22   90.29   12.90
   3   4  22  106.89   10.00
   4  -4  22   90.09   10.20
  -4   4  22  100.49   14.20
  -4  -4  22   82.49   13.30
   0  -5  22    8.90    6.40
   0   5  22   10.80    5.80
   1  -5  22   25.10    6.90
  -1   5  22   19.60    7.20
   1   5  22   35.50    6.50
  -1  -5  22   22.70    7.80
   2  -5  22   31.10    7.30
  -2   5  22   31.60    8.60
  -2  -5  22   42.50    9.90
   2   5  22   38.00    6.20
  -3   5  22  213.78   18.30
   3  -5  22  214.88   15.20
  -3  -5  22  218.88   18.70
   4  -5  22   20.20    7.40
  -4   5  22   27.50   10.50
  -4  -5  22   16.30   10.00
   0  -6  22   11.20    6.90
   0   6  22   12.00    6.00
   1  -6  22   35.50    8.10
  -1   6  22   49.50    8.80
   1   6  22   51.69    7.20
  -1  -6  22   40.30    8.80
   2  -6  22   17.70    6.60
  -2   6  22   15.60    7.90
  -2  -6  22   23.10    8.00
   3  -6  22   64.09    9.10
  -3   6  22   62.29   11.00
  -3  -6  22   55.49   10.70
   4  -6  22    9.10    6.80
  -4   6  22    6.60    8.60
  -4  -6  22   -1.80    7.60
   0   7  22   26.70    6.90
   0  -7  22   22.00    7.90
  -1   7  22  145.49   13.60
   1  -7  22  145.89   13.60
   1   7  22  139.49   16.70
  -1  -7  22  166.48   14.80
  -2   7  22   14.30    7.60
   2  -7  22   14.90    6.60
  -2  -7  22   24.90    9.10
   3  -7  22   78.99    9.90
  -3   7  22   52.19   10.40
  -3  -7  22   48.10   11.10
  -4   7  22   17.30    9.40
   4  -7  22   26.40    7.60
  -4  -7  22   32.10   10.50
   0  -8  22   13.90    7.40
   0   8  22   16.30    6.00
   1  -8  22    8.00    7.10
  -1   8  22   12.70    6.70
  -1  -8  22    6.00    7.10
   2  -8  22  340.37   20.90
  -2   8  22  356.56   22.00
  -2  -8  22  298.17   22.10
   3  -8  22   19.10    7.40
  -3   8  22   14.20    8.10
  -3  -8  22   22.30    9.10
   0  -9  22   74.59   11.10
   1  -9  22   23.60    7.50
  -1   9  22   20.30    6.90
  -1  -9  22   22.20    8.30
   2  -9  22   78.79   10.70
  -2   9  22   81.59   11.20
  -2  -9  22   92.99   12.50
   3  -9  22   43.00    9.00
  -3   9  22   40.80    9.80
  -3  -9  22   51.39   10.90
   0 -10  22    2.70    7.30
   1 -10  22   68.99   10.60
  -1 -10  22   74.69   11.50
   2 -10  22   37.10    9.10
  -2  10  22   31.30    8.30
  -2 -10  22   40.70    9.70
   0 -11  22  170.18   16.00
   1 -11  22    1.80    6.70
  -1 -11  22   -3.00    6.70
   0   0  23   -0.20    6.00
  -1   0  23   38.40    8.30
   1   0  23   31.80    7.10
  -2   0  23    5.00    6.90
   2   0  23    1.90    5.10
  -3   0  23   34.90   10.10
   3   0  23   24.30    6.40
   4   0  23  101.49    9.80
  -4   0  23   95.49   13.70
   0   1  23   93.89   10.70
   0  -1  23   95.39   10.60
   1  -1  23  207.28   15.20
  -1   1  23  203.48   16.30
   1   1  23  225.38   15.20
  -1  -1  23  221.58   16.50
  -2   1  23   19.90    7.60
   2  -1  23   15.30    5.80
   2   1  23   15.60    5.60
  -2  -1  23   34.20    9.10
   3  -1  23   54.59    7.90
  -3   1  23   53.19   10.50
  -3  -1  23   46.20   10.00
   3   1  23   44.40    7.30
   4  -1  23    2.80    5.30
  -4   1  23   15.80    9.60
  -4  -1  23   -3.80    8.90
   4   1  23    0.10    5.00
   0  -2  23    8.40    6.40
   0   2  23    5.30    6.00
   1  -2  23   39.30    7.90
  -1   2  23   41.10    8.60
   1   2  23   32.10    7.00
  -1  -2  23   36.70    8.50
   2  -2  23  180.38   14.00
  -2   2  23  184.48   16.80
   2   2  23  209.38   13.50
  -2  -2  23  172.68   16.30
   3  -2  23   48.30    7.60
  -3   2  23   45.20   10.00
   3   2  23   52.79    7.40
  -3  -2  23   38.00    9.70
   4  -2  23  150.28   12.30
  -4   2  23  124.59   15.60
  -4  -2  23  154.48   17.30
   0   3  23   46.30    8.00
   0  -3  23   57.09    8.70
  -1   3  23   40.70    8.10
   1  -3  23   32.90    7.50
   1   3  23   36.60    7.20
  -1  -3  23   40.50    8.50
  -2   3  23   40.70    9.20
   2  -3  23   39.20    7.90
   2   3  23   45.80    6.90
  -2  -3  23   36.50    8.90
   3  -3  23   79.99    9.20
  -3   3  23   50.89   10.50
   3   3  23   59.79    7.50
  -3  -3  23   58.79   10.90
   4  -3  23  111.09   11.00
  -4   3  23   93.29   14.60
  -4  -3  23  113.99   15.70
   0   4  23  187.98   14.50
   0  -4  23  185.58   15.10
   1  -4  23    3.90    6.30
  -1   4  23   11.00    6.60
   1   4  23    1.90    5.10
  -1  -4  23   -3.60    6.40
   2  -4  23   37.20    7.50
  -2   4  23   28.10    8.70
   2   4  23   37.50    6.70
  -2  -4  23   52.29    9.80
  -3   4  23   93.69   13.00
   3  -4  23  114.89   11.10
  -3  -4  23  101.89   13.40
   4  -4  23   87.09   10.00
  -4   4  23   87.79   13.80
  -4  -4  23   82.99   14.00
   0  -5  23   10.10    7.10
   0   5  23    9.30    5.70
   1  -5  23  152.48   13.60
  -1   5  23  141.49   13.70
   1   5  23  143.99   12.20
  -1  -5  23  160.88   15.10
   2  -5  23   56.99    8.90
  -2   5  23   49.70   10.00
  -2  -5  23   45.60   10.20
   3  -5  23    3.20    6.50
  -3   5  23   13.60    8.80
  -3  -5  23    7.70    8.10
  -4   5  23   48.70   11.80
   4  -5  23   23.40    7.50
  -4  -5  23   32.80   10.30
   0  -6  23   78.99   10.20
   0   6  23   76.79    9.50
  -1   6  23    2.50    6.70
   1  -6  23   10.60    7.00
  -1  -6  23   12.30    7.20
   1   6  23    8.50    5.10
  -2   6  23   67.29   10.80
   2  -6  23   62.29    9.00
  -2  -6  23   74.69   11.30
   3  -6  23   -4.50    6.00
  -3   6  23  -15.80    6.90
  -3  -6  23    7.00    8.60
   0   7  23   20.80    6.50
   0  -7  23   14.30    7.20
   1  -7  23  147.39   13.90
  -1   7  23  156.78   14.50
  -1  -7  23  152.68   15.00
  -2   7  23   20.20    8.00
   2  -7  23    6.80    6.60
  -2  -7  23   21.70    9.20
  -3   7  23   -7.10    7.30
   3  -7  23   11.50    7.30
  -3  -7  23   15.70    9.10
   0  -8  23  558.84   30.60
  -1   8  23   26.90    7.60
   1  -8  23   21.00    8.00
  -1  -8  23   33.00    8.90
  -2   8  23   13.00    7.70
   2  -8  23   12.30    7.30
  -2  -8  23   17.60    8.90
   3  -8  23    5.00    7.30
  -3   8  23   26.40    9.00
  -3  -8  23    4.50    8.60
   0  -9  23   49.60    9.30
   1  -9  23  121.49   12.90
  -1   9  23   83.99   15.40
  -1  -9  23  107.19   13.40
   2  -9  23   46.80    9.40
  -2   9  23   41.70    9.40
  -2  -9  23   38.10   10.10
   0 -10  23   27.20    8.80
   1 -10  23   31.70    8.50
  -1 -10  23   15.20    8.70
   0   0  24   79.89   10.10
   1   0  24   29.10    7.10
  -1   0  24   45.40    9.00
   2   0  24  161.58   13.00
  -2   0  24  143.99   15.00
   3   0  24    7.50    5.80
  -3   0  24   20.10    8.80
   4   0  24   73.39    9.00
  -4   0  24   74.09   13.10
   0  -1  24   24.20    7.10
   0   1  24   13.80    6.70
   1  -1  24   55.39    8.90
  -1   1  24   64.49    9.90
  -1  -1  24   53.89    9.50
   1   1  24   58.19    8.50
  -2   1  24  493.65   29.00
   2  -1  24  494.85   26.70
   2   1  24  509.25   26.30
  -2  -1  24  504.85   29.10
  -3   1  24   32.40   10.20
   3  -1  24   18.50    6.90
   3   1  24   37.40    7.10
  -3  -1  24   57.49   11.20
   4  -1  24    8.50    5.70
  -4   1  24    4.00    9.90
   4   1  24   -3.70    6.50
  -4  -1  24    7.60    8.70
   0   2  24  123.89   12.10
   0  -2  24  132.99   13.00
   1  -2  24   33.30    7.40
  -1   2  24   35.60    8.70
  -1  -2  24   36.30    9.10
   1   2  24   29.30    7.20
   2  -2  24   36.80    7.70
  -2   2  24   34.90    9.40
   2   2  24   32.00    6.80
  -2  -2  24   28.30    8.30
   3  -2  24  432.26   23.50
  -3   2  24  394.06   26.70
  -3  -2  24  426.26   27.30
   3   2  24  430.56   22.80
   4  -2  24   22.00    6.80
   0   3  24   84.89   10.30
   0  -3  24   91.29   11.20
  -1   3  24   59.49    9.30
   1  -3  24   39.20    7.90
   1   3  24   44.90    7.80
  -1  -3  24   38.30    9.10
  -2   3  24   57.69   10.50
   2  -3  24   56.29    8.80
  -2  -3  24   36.30    9.00
   2   3  24   52.99    7.90
   3  -3  24   86.39   10.20
  -3   3  24   79.69   12.80
  -3  -3  24   85.69   13.60
   0   4  24   21.10    7.00
   0  -4  24   27.40    8.00
   1  -4  24   25.00    7.20
  -1   4  24   32.30    8.00
   1   4  24   22.80    6.40
  -1  -4  24    4.60    7.20
  -2   4  24  174.78   15.80
   2  -4  24  147.59   13.70
  -2  -4  24  157.98   15.20
   2   4  24  145.69   12.90
   3  -4  24   43.10    8.20
  -3   4  24   46.10   11.00
  -3  -4  24   46.70   11.20
   0   5  24   79.59   10.00
   0  -5  24   64.29    9.60
   1  -5  24  128.59   12.90
  -1   5  24  111.39   12.50
   1   5  24  106.19   10.60
  -1  -5  24  111.19   13.50
  -2   5  24  107.09   13.10
   2  -5  24  108.59   11.60
  -2  -5  24   91.89   12.80
  -3   5  24   48.40   10.90
   3  -5  24   63.39   15.10
  -3  -5  24   49.80   10.80
   0   6  24   76.09   10.00
   0  -6  24   68.69   10.80
   1  -6  24   50.79    8.80
  -1   6  24   34.80    8.60
  -1  -6  24   30.60    8.90
   2  -6  24    3.10    6.30
  -2   6  24    4.60    7.30
  -2  -6  24    1.40    7.70
  -3   6  24   78.29   12.50
   3  -6  24   74.79   10.60
  -3  -6  24  106.79   14.30
   0  -7  24   66.39   10.50
   0   7  24   55.09   12.90
   1  -7  24   82.79   10.90
  -1   7  24   97.79   11.50
  -1  -7  24   85.29   11.70
  -2   7  24   71.19   11.60
   2  -7  24   78.59   10.40
  -2  -7  24  123.89   14.50
   0  -8  24  144.59   14.40
   1  -8  24  343.17   21.20
  -1   8  24  328.77   21.50
  -1  -8  24  312.57   22.40
   0  -9  24    3.70    7.90
   0   0  25   -2.40    6.10
  -1   0  25   75.09   11.00
   1   0  25   65.79    9.50
  -2   0  25   -6.40    7.70
   2   0  25   14.20    6.00
   3   0  25  131.79   11.90
  -3   0  25  116.49   15.20
   0   1  25   61.99    9.40
   0  -1  25   58.79    9.80
   1  -1  25   89.89   10.60
  -1   1  25   87.79   11.40
   1   1  25   86.59   10.10
  -1  -1  25   98.79   11.90
   2  -1  25   74.49    9.70
  -2   1  25   71.99   11.40
   2   1  25   80.59    9.70
  -2  -1  25   65.89   10.90
  -3   1  25   23.20    9.20
   3  -1  25   18.70    6.80
   3   1  25   20.30    6.40
  -3  -1  25    9.60    9.10
   0  -2  25   -1.20    6.10
   0   2  25    7.30    6.20
   1  -2  25   57.29    9.10
  -1   2  25   58.09    9.90
   1   2  25   46.90    8.30
  -1  -2  25   52.09   10.20
   2  -2  25  205.28   15.40
  -2   2  25  196.18   18.20
  -2  -2  25  201.98   17.90
   2   2  25  201.58   14.70
   3  -2  25   24.90    7.30
  -3   2  25   17.80    9.40
  -3  -2  25   17.40    8.90
   0  -3  25    5.30    6.80
   0   3  25   15.10    6.80
  -1   3  25   40.20    9.00
   1  -3  25   21.90    8.10
   1   3  25   31.40    7.20
  -1  -3  25   28.70    9.20
  -2   3  25   61.09   10.90
   2  -3  25   71.59   10.00
  -2  -3  25   71.99   11.30
   2   3  25   55.39    8.40
   0   4  25   33.80    7.90
   0  -4  25   31.90    8.30
   1  -4  25   91.39   11.00
  -1   4  25   74.69   10.80
  -1  -4  25   94.99   12.50
   1   4  25   83.09   10.10
   2  -4  25   47.20    9.10
  -2   4  25   50.09   10.80
  -2  -4  25   37.40    9.50
   0   5  25   86.89   10.50
   0  -5  25   91.69   12.10
  -1   5  25   41.00    9.50
   1  -5  25   55.49    9.40
  -1  -5  25   55.89   10.30
   2  -5  25   56.59    9.40
  -2   5  25   64.19   10.80
  -2  -5  25   45.80   10.70
   0  -6  25   -0.90    6.40
   0   6  25   -7.10    5.90
  -1   6  25   17.80    8.20
   1  -6  25   21.90    8.30
  -1  -6  25   38.30    9.60
   0  -7  25   99.29   12.70
   0   0  26   97.39   11.80
   1   0  26    1.70    6.50
  -1   0  26    5.80    7.60
  -2   0  26  279.27   20.90
   2   0  26  266.77   17.70
   0   1  26   33.40    8.20
   0  -1  26   41.20    9.00
  -1   1  26  255.77   19.60
   1  -1  26  243.88   17.70
   1   1  26  262.57   18.10
  -1  -1  26  250.67   19.10
  -2   1  26   87.39   12.70
   2  -1  26   67.49    9.70
   2   1  26   84.19   10.10
  -2  -1  26   71.09   11.70
   0  -2  26   61.09   11.30
   0   2  26   79.09   10.90
   1  -2  26   56.39    9.60
  -1   2  26   51.59   10.00
   1   2  26   75.69    9.90
  -1  -2  26   62.29   11.20
   0  -3  26   17.70    7.90
   0   3  26   19.80    7.50
   1  -3  26   -4.80    6.50
  -1   3  26    3.70    7.00
  -1  -3  26    7.30    7.80
   1   3  26    4.30    6.20
   0  -4  26   -0.20    7.60
   0   4  26   14.40    7.30
  -1   4  26   17.40    7.70
   1  -4  26    8.80    7.50
  -1  -4  26    6.40    8.40
   1   4  26   11.50    8.10

_computing_structure_solution     'SHELXT 2014/4 (Sheldrick, 2014)'
;
_shelx_hkl_checksum   82979
